# Supplementary material for: Visible-light-enabled spirocyclization of alkynes leading to 3-sulfonyl and 3-sulfenyl azaspiro[4,5]trienones
Source: Royal Society of Chemistry journal article supplement (doi:10.1039/c7gc02330h), 2017-01-01

## Supplementary Information

### Visible-light-enabled spirocyclization of alkynes leading to 3-sulfonyl and 3-sulfenyl azaspiro[4,5]trienones

Wei Wei,<sup>\*ab</sup> Huanhuan Cui,<sup>a</sup> Daoshan Yang,<sup>a</sup> Huilan Yue,<sup>b</sup> Chenglong He,<sup>a</sup> Yulong Zhang,<sup>a</sup> Hua Wang<sup>\*a</sup>

<sup>a</sup> *Institute of Medicine and Material Applied Technologies, Key Laboratory of Pharmaceutical Intermediates and Analysis of Natural Medicine, School of Chemistry and Chemical Engineering, Qufu Normal University, Qufu 273165, Shandong, China*

<sup>b</sup> *Key Laboratory of Tibetan Medicine Research, Northwest Institute of Plateau Biology, Chinese Academy of Sciences, Qinghai 810008, China.*

*\*E-mail: weiweiqfnu@163.com; huawang\_qfnu@126.com*

## Contents

|                                                                                                                                              |         |
|----------------------------------------------------------------------------------------------------------------------------------------------|---------|
| 1. General information .....                                                                                                                 | S2      |
| 2. Optimization of conditions for the synthesis of 3-sulfenyl azaspiro[4,5]trienone <b>5a</b> .....                                          | S2-S3   |
| 3. General procedure for visible-light-induced spirocyclization of alkynes leading to 3-sulfonyl and 3-sulfenyl azaspiro[4,5]trienones ..... | S3-S4   |
| 4. Preliminary mechanistic studies .....                                                                                                     | S4-S17  |
| 5. Characterization data of products <b>3a–5r</b> .....                                                                                      | S17-S31 |
| 6. Copies of NMR spectra for <b>3a–5r</b> .....                                                                                              | S32-S68 |

## 1. General information

All commercially available reagent grade chemicals were purchased from Aldrich, Acros, Alfa Aesar and Beijing Ouhe Chemical Company and used as received without further purification unless otherwise stated. All solvents were dried according to standard procedures.  $^1\text{H}$  NMR and  $^{13}\text{C}$  NMR were recorded in  $\text{CDCl}_3$  on a Bruker Avance III 400 spectrometer with TMS as internal standard (500 MHz  $^1\text{H}$ , 125 MHz  $^{13}\text{C}$ ) at room temperature, the chemical shifts ( $\delta$ ) were expressed in ppm and  $J$  values were given in Hz. The following abbreviations are used to indicate the multiplicity: singlet (s), doublet (d), triplet (t), quartet (q), doublet of doublets (dd), doublet of triplets (dt), and multiplet (m). All first order splitting patterns were assigned on the basis of the appearance of the multiplet. Splitting patterns that could not be easily interpreted were designated as multiplet (m). Mass analyses and HRMS were obtained on a Finnigan-LCQDECA mass spectrometer and a Bruker Daltonics Bio-TOF-Q mass spectrometer by the ESI method, respectively. Column chromatography was performed on silica gel (200-300 mesh). There is 3.0 cm distance between the reactor and LEDs.

## 2. Optimization of conditions for the synthesis of 3-sulphenyl azaspiro[4,5]trienone **5a**<sup>a</sup> (Table S1).

| 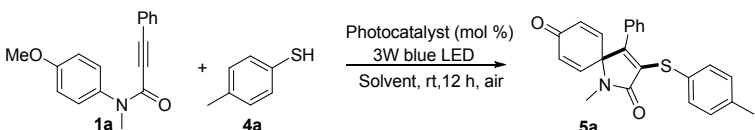 |                      |                                           |                       |
|--------------------------------------------------------------------------------------|----------------------|-------------------------------------------|-----------------------|
| Entry                                                                                | Photocatalyst (mol%) | Solvent                                   | Yield(%) <sup>b</sup> |
| 1                                                                                    | Eosin Y (5)          | $\text{CH}_3\text{CN}$                    | 66                    |
| 2                                                                                    | Eosin Y (2)          | $\text{CH}_3\text{CN}$                    | 74                    |
| 3                                                                                    | Eosin Y (1)          | $\text{CH}_3\text{CN}$                    | 87                    |
| 4                                                                                    | Eosin Y (1)          | 1,4-dioxane                               | 59                    |
| 5                                                                                    | Eosin Y (1)          | Toluene                                   | 32                    |
| 6                                                                                    | Eosin Y (1)          | $\text{CHCl}_3$                           | 58                    |
| 7                                                                                    | Eosin Y (1)          | Acetone                                   | 54                    |
| 8                                                                                    | Eosin Y (1)          | DCE                                       | 58                    |
| 9                                                                                    | Eosin Y (1)          | DMSO                                      | 25                    |
| 10                                                                                   | Eosin Y (1)          | DME                                       | 14                    |
| 11                                                                                   | Eosin Y (1)          | THF                                       | 15                    |
| 12                                                                                   | Eosin Y (1)          | $\text{CH}_3\text{CN}/\text{H}_2\text{O}$ | 52                    |
| 13                                                                                   | Eosin Y (1)          | $\text{H}_2\text{O}$                      | 14                    |
| 14                                                                                   | Eosin B (1)          | $\text{CH}_3\text{CN}$                    | 24                    |
| 15                                                                                   | Rose Bengal (1)      | $\text{CH}_3\text{CN}$                    | 42                    |
| 16                                                                                   | Rhodamine B (1)      | $\text{CH}_3\text{CN}$                    | 46                    |

|    |                                          |                    |                |
|----|------------------------------------------|--------------------|----------------|
| 17 | Acridine Red (1)                         | CH <sub>3</sub> CN | 33             |
| 18 | Na <sub>2</sub> -Eosin Y (1)             | CH <sub>3</sub> CN | 46             |
| 19 | Ru(bpy) <sub>3</sub> Cl <sub>2</sub> (1) | CH <sub>3</sub> CN | 65             |
| 20 | --                                       | CH <sub>3</sub> CN | 0              |
| 21 | Eosin Y (1)                              | CH <sub>3</sub> CN | 0 <sup>c</sup> |

<sup>a</sup> Reaction conditions: **1a** (0.125 mmol), **4a** (0.25 mmol), catalyst (1-5 mol%), Solvent 2 mL, at room temperature, 12h, under air. DME: 1,2-dimethoxyethane; DCE: 1,2-dichloroethane; THF: tetrahydrofuran; <sup>b</sup> Isolated yields based on **1a**. <sup>c</sup> Without visible-light irradiation.

### 3. General procedure

#### 3.1 The procedure for visible-light-induced difunctionalization of alkynes with sulfinic acids leading to 3-sulfonyl azaspiro[4,5]trienones.

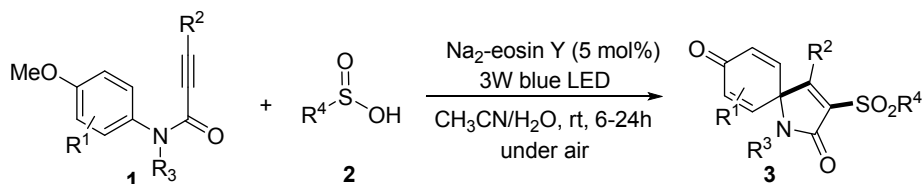

To a solution of sulfinic acid **2** (0.375 mmol) and Na<sub>2</sub>-eosin Y (0.00625mmol, 5 mol%) in CH<sub>3</sub>CN/H<sub>2</sub>O (v<sub>1</sub>/v<sub>2</sub>=1/1) 2 mL was added N-(*p*-methoxyaryl)-propiolamide **1** (0.125 mmol). The reaction vessel was allowed to stir at room temperature under the irradiation of 3W blue LED lamps for 6-24h. After the reaction, the resulting mixture was extracted with EtOAc and the solvent was then removed under vacuum. The residue was purified by flash column chromatography using a mixture of petroleum ether and ethyl acetate as eluent to give the desired product **3**.

#### 3.2 The procedure for visible-light-induced difunctionalization of alkynes with thiols leading to 3-sulfenyl azaspiro[4,5]trienones.

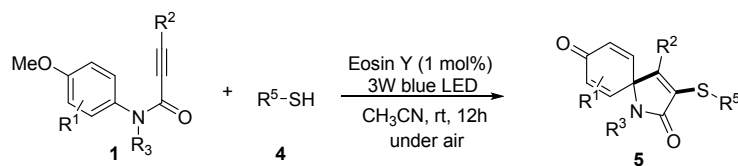

To a solution of thiol **5** (0.25 mmol) and Eosin Y (0.00125mmol, 1 mol %) in CH<sub>3</sub>CN 2 mL was added N-(*p*-methoxyaryl)-propiolamide **1** (0.125 mmol). The reaction mixture was open to the air and stirred under the irradiation of 3W blue LED lamps at room temperature for 12h. After completion of the reaction, the solution was concentrated in vacuum. The residue was purified by flash column chromatography using

a mixture of petroleum ether and ethyl acetate as eluent to give the desired product **5**.

#### 4. Preliminary mechanistic studies

**4.1 N-(p-methoxyaryl)-propiolamide **1a** was added independently under the standard conditions.**

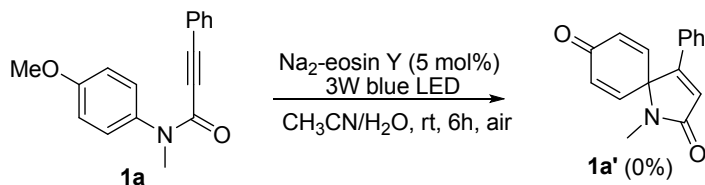

To a solution of Na<sub>2</sub>-Eosin Y (0.00625mmol, 5 mol%) in CH<sub>3</sub>CN/H<sub>2</sub>O (v<sub>1</sub>/v<sub>2</sub>=1/1) 2 mL was added N-(p-methoxyaryl)-propiolamide **1a** (0.125 mmol). The reaction mixture was open to the air and stirred under the irradiation of 3W blue LED lamps at room temperature for 6h. After completion of the reaction, the solution was concentrated in vacuum, none of the desired product **1a'** was detected.

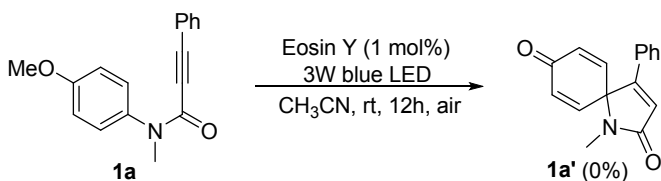

To a solution of Eosin Y (0.00125mmol, 1 mol %) in CH<sub>3</sub>CN 2 mL was added N-(p-methoxyaryl)-propiolamide **1a** (0.125 mmol). The reaction mixture was open to the air and stirred under the irradiation of 3W blue LED lamps at room temperature for 12h. After completion of the reaction, the solution was concentrated in vacuum, none of the desired product **1a'** was detected.

#### 4.2 The addition of TEMPO in the model reaction systems.

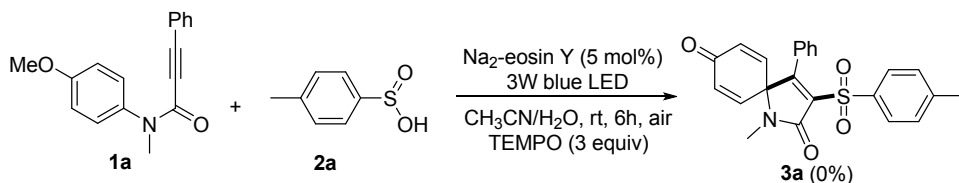

To a solution of 4-methylbenzenesulfonic acid **2a** (0.375 mmol), TEMPO (0.375 mmol), and Na<sub>2</sub>-Eosin Y (0.00625mmol, 5 mol%) in CH<sub>3</sub>CN/H<sub>2</sub>O (v<sub>1</sub>/v<sub>2</sub>=1/1) 2 mL was added N-(p-methoxyaryl)-propiolamide **1** (0.125 mmol) (0.125 mmol). The reaction

mixture was open to air and stirred under the irradiation of 3W blue LED lamps at room temperature for 6h. After completion of the reaction, the solution was concentrated in vacuum, none of desired product **3a** was detected.

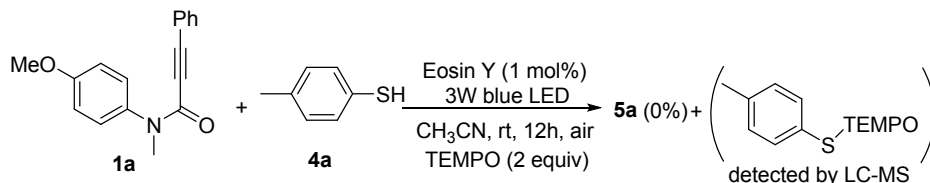

To a solution of 4-methylbenzenethiol **2a** (0.25 mmol), TEMPO (0.25 mmol), and Eosin Y (0.001 mmol, 1 mol %) in CH<sub>3</sub>CN 2 mL was added N-(*p*-methoxyaryl)-propiolamide **1** (0.125 mmol) (0.125 mmol). The reaction mixture was open to the air and stirred under the irradiation of 3W blue LED lamps at room temperature for 12h. After completion of the reaction, the solution was concentrated in vacuum, TEMPO-trapped thiyl radical complex (p-MePhS-TEMPO) was also detected by LC-MS experiment and none of desired product **5a** was obtained.

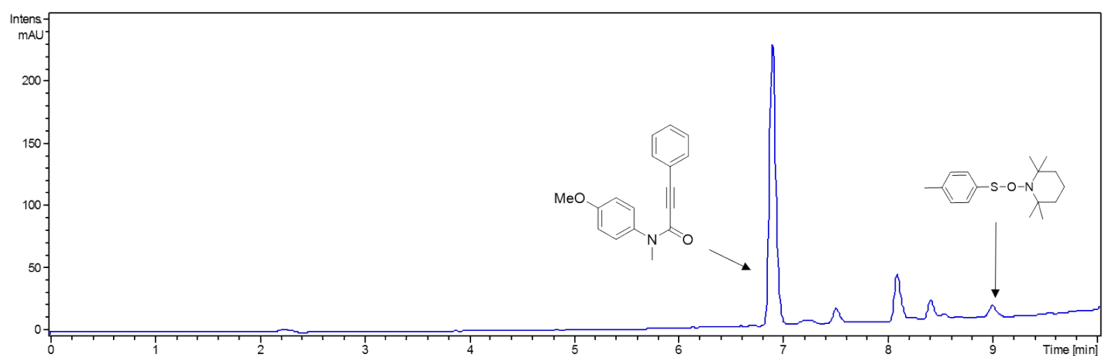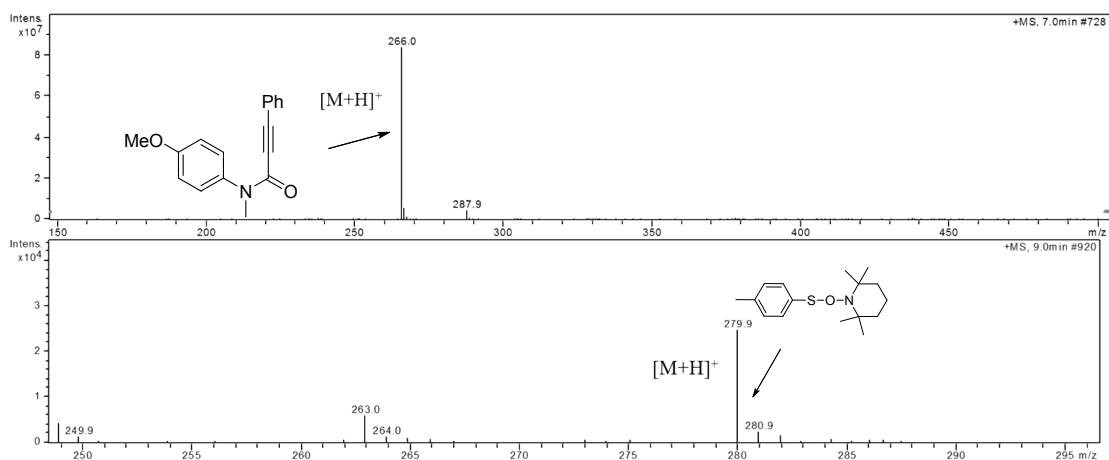

LC-MS spectra

### 4.3 Investigation of mechanism by ESR

Electron spin resonance (ESR) spectra were recorded with a JEOL JES FA200 (X-band). The sample was bubbled with Ar for over 20 min, then small amount of the sample was transferred to a flat cell, and ESR spectra were recorded under different conditions.

(1)

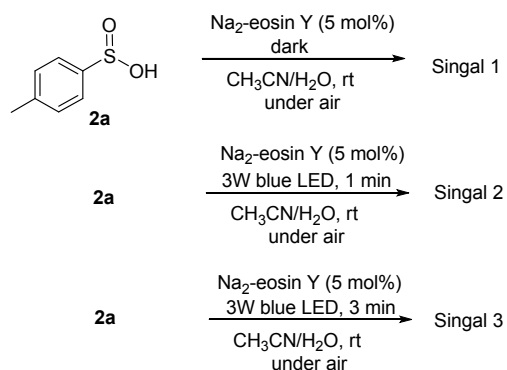

Mixture of Na<sub>2</sub>-eosin Y (2.5 mM), 4-methylbenzenesulfinic acid **2a** (50 mM), and DMPO (100 mM) in CH<sub>3</sub>CN/H<sub>2</sub>O was transferred to a capillary, and the ESR spectra were recorded under different conditions (Figure S1.). A very weak radical signal was trapped without irradiation of visible light. Notably, when the reaction mixture of **2a** was irradiated with visible light (1 min and 3 min), a distinct signal of a trapped radical was observed, suggesting the involvement of a sulfonyl radical in the transformation. These results indicated that photocatalysis plays an essential role in the formation of the sulfonyl radical.

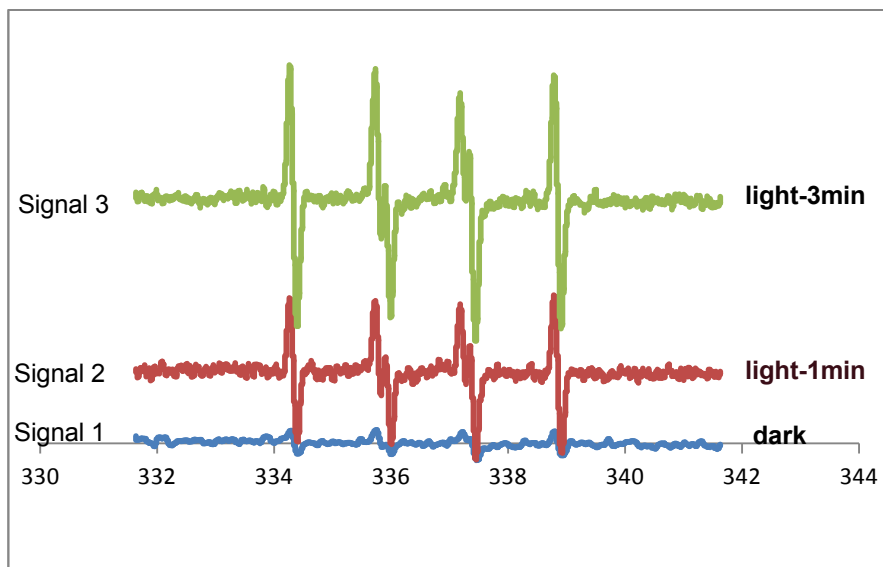

**Figure S1.** ESR spectra of mixture of Na<sub>2</sub>-eosin Y (2.5 mM), 4-methylbenzenesulfonic acid **2a** (50 mM), and DMPO (100 mM) in CH<sub>3</sub>CN/H<sub>2</sub>O under different conditions. ESR conditions: frequency (9.43 GHz), power (1 mW), modulation width (0.1 mT), center field (336.7 mT), sweep width (10 mT), sweep time (1 min), time constant (0.1 s).

(2)

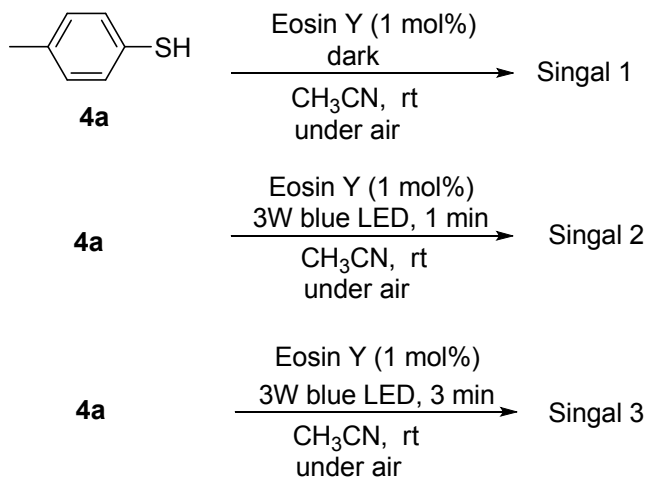

Mixture of Eosin Y (0.25mM), 4-methylbenzenethiol **4a** (25mM), and DMPO (50 mM) in CH<sub>3</sub>CN was transferred to a flat cell, and the ESR spectra were recorded under different conditions (Figure S2). No radical was trapped without irradiation of visible light. Notably, when the reaction mixture of **4a** was irradiated with visible light (1 min and 3 min), a distinct signal of a trapped radical was observed, suggesting the involvement of a thiyl radical in the transformation. These results indicated that photocatalysis plays an essential role in the formation of the thiyl radical.

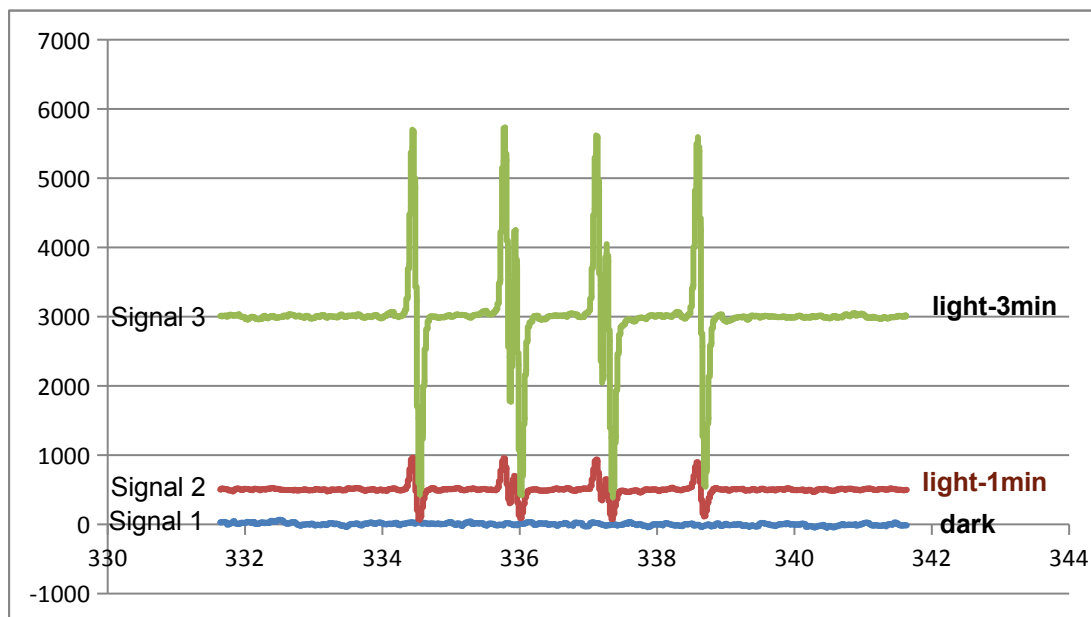

**Figure S2.** ESR spectra of mixture of Eosin Y (0.25 mM), 4-methylbenzenethiol **4a** (25 mM), and DMPO (50 mM) in CH<sub>3</sub>CN under different conditions. ESR conditions: frequency (9.43 GHz), power (1 mW), modulation width (0.1 mT), center field (336.7 mT), sweep width (10 mT), sweep time (1 min), time constant (0.1 s).

### 4.3 The UV-visible spectroscopy and Fluorescence quenching studies for the synthesis of 3-sulfonyl azaspiro[4,5]trienone (Stern–Volmer Studies)

UV-visible spectroscopy of reaction solution was recorded on a SHIMADZU UV-3600 UV-visible spectrophotometer. The sample was prepared by mixing N-(4-methoxyphenyl)-N-methyl-3-phenylpropiolamide **1a** with solvent CH<sub>3</sub>CN ( $[N-(4\text{-methoxyphenyl})-N\text{-methyl-3-phenylpropiolamide}] = 1.25 \times 10^{-2} \text{ mol/L}$  in a light path quartz UV cuvette. The absorption was collected and the result was listed in Figure S3.

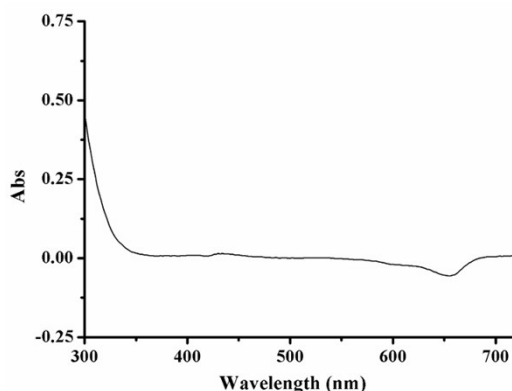

**Figure S3.** UV-vis spectra of **1a**.

UV-visible spectroscopy of reaction solution was recorded on a SHIMADZU UV-3600 UV-visible spectrophotometer. The sample was prepared by mixing 4-methylbenzenesulfinic acid **2a** with solvent CH<sub>3</sub>CN (M[4-methylbenzenesulfinic acid] =  $3.75 \times 10^{-2}$  mol/L in a light path quartz UV cuvette. The absorption was collected and the result was listed in Figure S4.

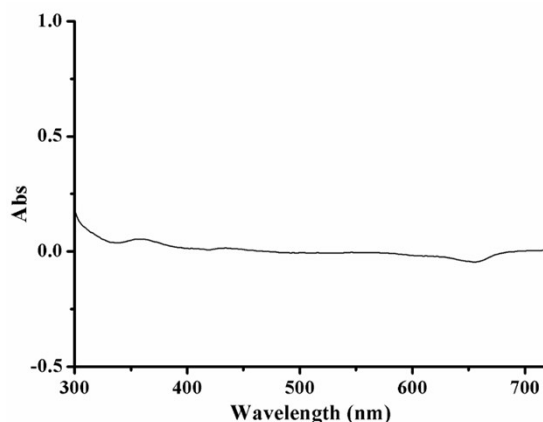

**Figure S4.** UV-vis spectra of the **2a**.

The fluorescence emission intensities were recorded on a Fluormax-4600 spectrofluorimeter. The excitation wavelength was fixed at 530 nm, and the emission wavelength was measured at 549 nm (emission maximum). The samples were prepared by mixing N-(4-methoxyphenyl)-N-methyl-3-phenylpropiolamide **1a** in CH<sub>3</sub>CN (total volume = 0.1 mL) in a light path quartz fluorescence cuvette. The concentration of N-(4-methoxyphenyl)-N-methyl-3-phenylpropiolamide **1a** stock solution is  $1.25 \times 10^{-2}$  mol/L in CH<sub>3</sub>CN. Then the emission intensity was collected and the result was presented in Figure S5.

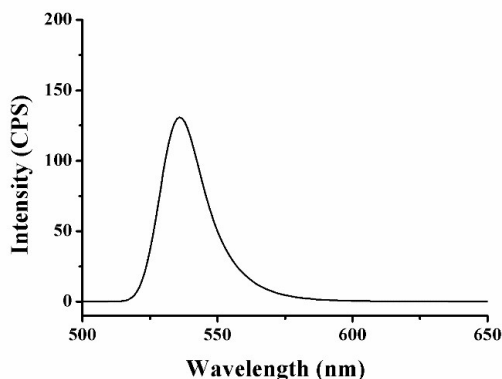

**Figure S5.** Fluorescence spectra of **1a**

The fluorescence emission intensities were recorded on a Fluormax-4600 spectrofluorimeter. The excitation wavelength was fixed at 530nm, and the emission wavelength was measured at 549 nm (emission maximum). The samples were prepared by mixing 4-methylbenzenesulfinic acid **2a** in CH<sub>3</sub>CN (total volume = 0.1 mL) in a light path quartz fluorescence cuvette. The concentration of 4-methylbenzene sulfonic acid stock solution is  $3.75 \times 10^{-2}$  mol/L in CH<sub>3</sub>CN. The concentration of 4-methylbenzenesulfinic acid **2a** stock solution is  $3.75 \times 10^{-2}$  mol/L in CH<sub>3</sub>CN. Then, the emission intensity was collected and the result was presented in Figure S6.

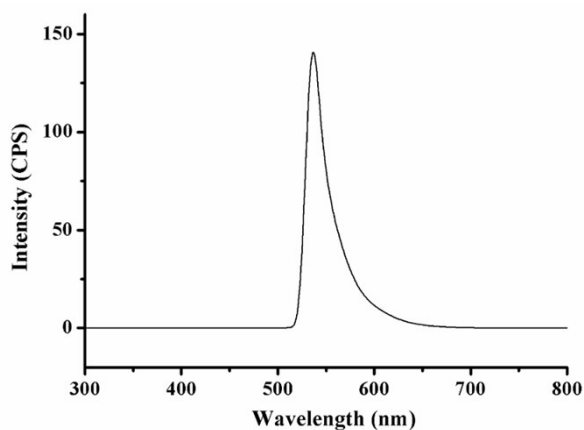

**Figure S6** Fluorescence spectra of **2a**.

UV-visible spectroscopy of reaction solution was recorded on a SHIMADZU UV-3600 UV-visible spectrophotometer. The sample was prepared by mixing Na<sub>2</sub>-EosinY, N-(4-methoxyphenyl)-N-methyl-3-phenylpropiolamide **1a** and 4-methylbenzenesulfinic acid **2a** with solvent CH<sub>3</sub>CN/H<sub>2</sub>O (V<sub>1</sub>/V<sub>2</sub>=1:1) (M[Na<sub>2</sub>-EosinY] =  $6.25 \times 10^{-4}$  mol/L, M[N-(4-methoxyphenyl)-N-methyl-3-phenylpropiolamide] =  $1.25 \times 10^{-2}$  mol/L, M[4-methylbenzenesulfinic acid] =  $3.75 \times 10^{-2}$  mol/L in a light path quartz UV cuvette. The UV-visible spectroscopy indicated that the maximum absorption wavelength of reaction solution was found to be 530 nm. The absorption was collected and the result was listed in Figure S7.

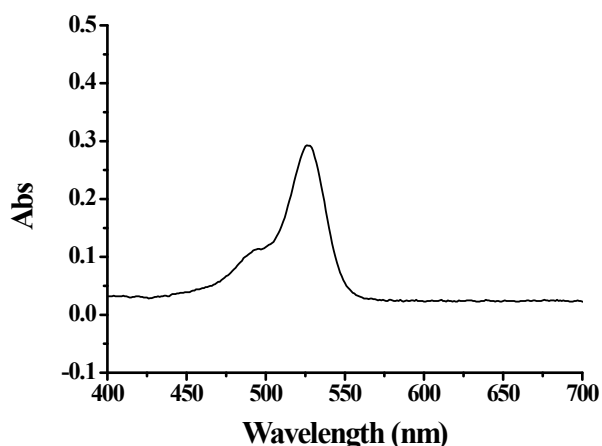

**Figure S7.** UV-vis spectra of the reaction mixture.

The fluorescence emission intensity of reaction solution was recorded on a Fluoromax-4600 spectrofluorimeter. The excitation wavelength was fixed at 530nm, and the emission wavelength was measured at 549 nm. The sample was prepared by mixing Na<sub>2</sub>-EosinY, N-(4-methoxyphenyl)-N-methyl-3-phenylpropiolamide **1a**, 4-methylbenzenesulfinic acid **2a** with solvent CH<sub>3</sub>CN/H<sub>2</sub>O (V<sub>1</sub>/V<sub>2</sub>=1:1) (M[Na<sub>2</sub>-EosinY] = 6.25×10<sup>-6</sup>mol/L, M[N-(4-methoxyphenyl)-N-methyl-3-phenylpropiolamide] = 1.25×10<sup>-4</sup>mol/L, M[4-methylbenzenesulfinic acid] = 3.75×10<sup>-4</sup>mol/L) in a light path quartz fluorescence cuvette. The emission intensity was collected and the result was listed in Figure S8.

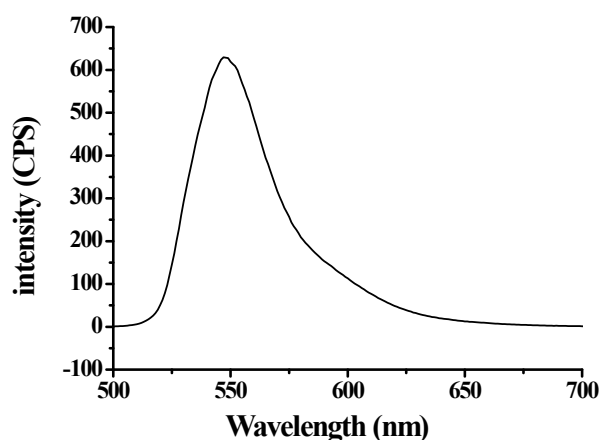

**Figure S8.** Fluorescence spectra of the reaction mixture.

The fluorescence emission intensities were recorded on a Fluormax-4600 spectrofluorimeter. The excitation wavelength was fixed at 530nm, and the emission wavelength was measured at 549 nm (emission maximum). The samples were prepared by mixing by Na<sub>2</sub>-EosinY ( $6.25 \times 10^{-6}$  mol/L) and different amount of 4-methylbenzenesulfinic acid **2a** in CH<sub>3</sub>CN (total volume = 0.1 mL) in a light path quartz fluorescence cuvette. The concentration of 4-methylbenzene sulfonic acid stock solution is  $3.75 \times 10^{-8}$  mol/L in CH<sub>3</sub>CN. For each quenching experiment, 0.1mL of 4-methylbenzenesulfinic acid **2a** stock solution was titrated to a mixed solution of Na<sub>2</sub>-EosinY (0.1mL, in a total volume = 1.0 mL). Then the emission intensity was collected and the results were presented in Figure S9.

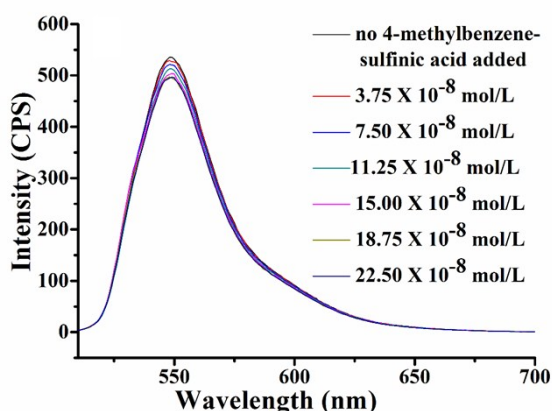

**Figure S9.** Quenching of Na<sub>2</sub>-EosinY fluorescence emission in the presence of 4-methylbenzenesulfinic acid **2a**

An indeed fluorescence quenching phenomenon of Na<sub>2</sub>-EosinY under various concentrations of 4-methylbenzenesulfinic acid **2a** was demonstrated in a curve of  $[I_0/I]$  vs  $C$  [4-methylbenzenesulfinic acid], as shown in Figure S10 (Stern-Volmer plots).

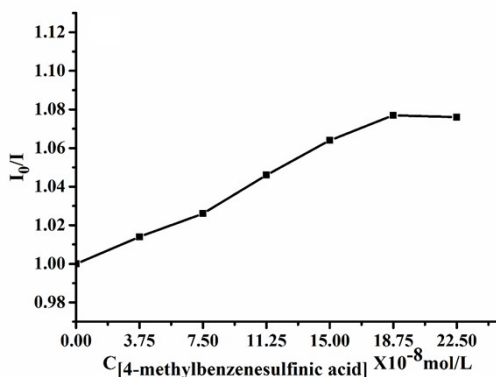

**Figure S10.** Stern-volmer plots

The fluorescence emission intensities were recorded on a Fluormax-4600 spectrofluorimeter. The excitation wavelength was fixed at 530nm, and the emission wavelength was measured at 549nm (emission maximum). The samples were prepared by mixing by Na<sub>2</sub>-EosinY ( $6.25 \times 10^{-6}$  mol/L) and different amount of N-(4-methoxyphenyl)-N-methyl-3-phenylpropiolamide **1a** in CH<sub>3</sub>CN (total volume = 0.1 mL) in a light path quartz fluorescence cuvette. The concentration of N-(4-methoxyphenyl)-N-methyl-3-phenylpropiolamide **1a** stock solution is  $1.25 \times 10^{-8}$  mol/L in CH<sub>3</sub>CN. For each quenching experiment, 0.1mL of alkynes stock solution was titrated to a mixed solution of Na<sub>2</sub>-EosinY (0.1mL, in a total volume = 1.0 mL). Then the emission intensity was collected and the results were presented in Figure S11. An fluorescence quenching phenomenon of Na<sub>2</sub>-EosinY under various concentrations of alkyne **1a** was shown in Figure S12 (Stern-Volmer plots).

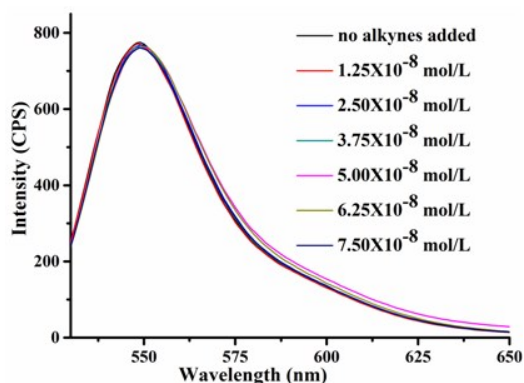

**Figure S11.** Quenching of Na<sub>2</sub>-EosinY fluorescence emission in the presence of alkyne **1a**

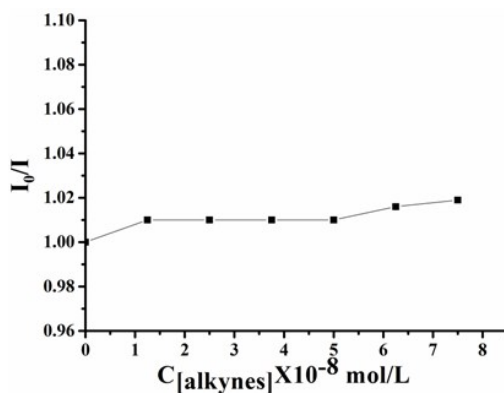

**Figure S12.** Stern-volmer plots.

#### 4.4 The UV-visible spectroscopy and Fluorescence quenching studies for the

### synthesis of 3-sulfenyl azaspiro[4,5]trienone (Stern–Volmer Studies)

UV-visible spectroscopy of reaction solution was recorded on a SHIMADZU UV-3600 UV-visible spectrophotometer. The sample was prepared by mixing of Eosin Y, N-(4-methoxyphenyl)-N-methyl-3-phenylpropiolamide **1a** and thiophenol **4a** with solvent (CH<sub>3</sub>CN) ( $M[\text{EosinY}] = 1.25 \times 10^{-5} \text{ mol/L}$ ,  $M[\text{alkynes}] = 1.25 \times 10^{-3} \text{ mol/L}$ ,  $M[\text{thiophenol}] = 2.5 \times 10^{-3} \text{ mol/L}$  in a light path quartz UV cuvette. The UV-visible spectroscopy indicated that the maximum absorption wavelength of reaction solution was found to be 530 nm. The absorption was collected and the result was listed in Figure S13.

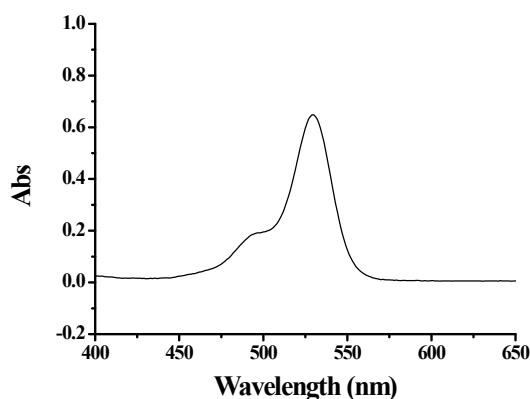

**Figure S13.** UV–vis spectra of the reaction mixture.

The fluorescence emission intensity of reaction solution was recorded on a Fluoromax-4600 spectrofluorimeter. The excitation wavelength was fixed at 500nm, and the emission wavelength was measured at 558 nm. The sample was prepared by mixing EosinY, alkynes, thiophenol with solvent (CH<sub>3</sub>CN) ( $M[\text{EosinY}] = 1.25 \times 10^{-6} \text{ mol/L}$ ,  $M[\text{alkyne}] = 1.25 \times 10^{-4} \text{ mol/L}$ ,  $M[\text{thiophenol}] = 2.5 \times 10^{-4} \text{ mol/L}$ ) in a light path quartz fluorescence cuvette. The emission intensity was collected and the result was listed in Figure S14.

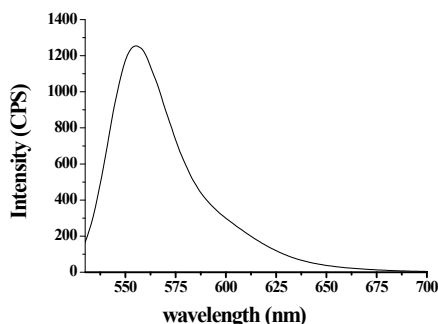

**Figure S14.** Fluorescence spectra of the reaction mixture

The fluorescence emission intensities were recorded on a Fluormax-4600 spectrofluorimeter. The excitation wavelength was fixed at 500nm, and the emission wavelength was measured at 558 nm (emission maximum). The samples were prepared by mixing by EosinY ( $1.25 \times 10^{-6}$  mol/L) and different amount of Thiophenol in  $\text{CH}_3\text{CN}$  (total volume = 0.1 mL) in a light path quartz fluorescence cuvette. The concentration of Thiophenol stock solution is  $2.5 \times 10^{-8}$  mol/L in  $\text{CH}_3\text{CN}$ . For each quenching experiment, 0.1mL of Thiophenol stock solution was titrated to a mixed solution of EosinY (0.1mL, in a total volume = 1.0 mL). Then the emission intensity was collected and the results were presented in Figure S15.

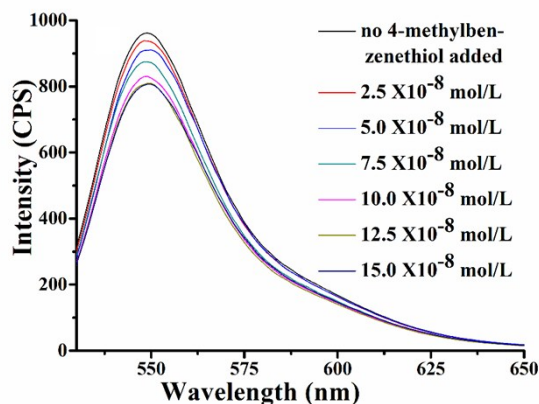

**Figure S15.** Quenching of EosinY fluorescence emission in the presence of thiophenol **4a**.

An indeed fluorescence quenching phenomenon of EosinY under various concentrations of thiophenol was demonstrated in a curve of  $[I_0/I]$  vs  $C_{[\text{Thiophenol}]}$ , as shown in Figure S16 (Stern-Volmer plots).

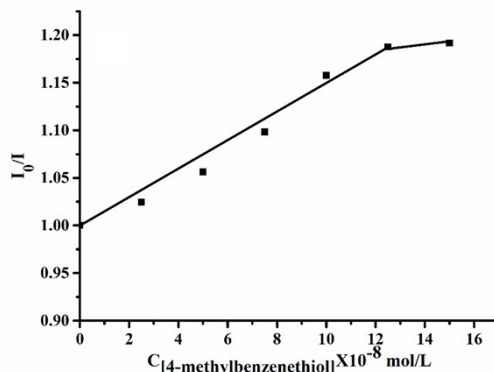

**Figure S16.** Stern-volmer plots.

The fluorescence emission intensities were recorded on a Fluormax-4600 spectrofluorimeter. The excitation wavelength was fixed at 500 nm, and the emission wavelength was measured at 557nm (emission maximum). The samples were prepared by mixing by Eosin Y ( $1.25 \times 10^{-6}$  mol/L) and different amount of styrene in  $\text{CH}_3\text{CN}$  (total volume = 0.1 mL) in a light path quartz fluorescence cuvette. The concentration of alkynes stock solution is  $1.25 \times 10^{-8}$  mol/L in  $\text{CH}_3\text{CN}$ . For each quenching experiment, 0.1mL of alkynes stock solution was titrated to a mixed solution of Eosin Y (0.1mL, in a total volume = 1.0 mL). Then the emission intensity was collected and the results were presented in Figure S17. An fluorescence quenching phenomenon of EosinY under various concentrations of alkynes was shown in Figure S18 (Stern-Volmer plots).

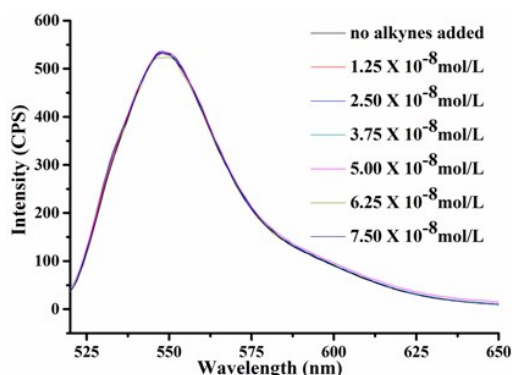

**Figure S17.** Quenching of Eosin Y fluorescence emission in the presence of alkyne **1a**.

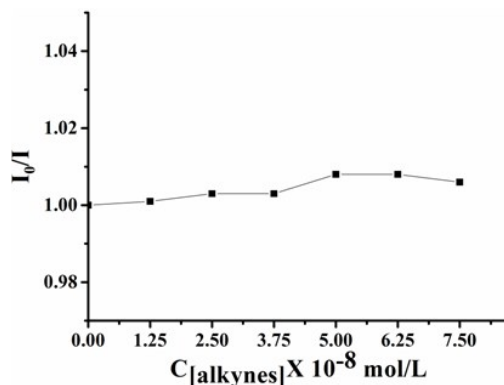

**Figure S18.** Stern-volmer plots.

## 5.Characterization data of products 3a-5r

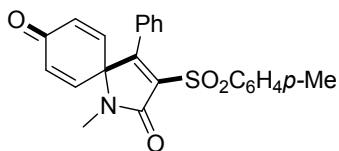

**1-methyl-4-phenyl-3-tosyl-1-azaspiro[4.5]deca-3,6,9-triene-2,8-dione (3a)**, Compound **3a** was obtained in 76% yield according to the general procedure (6h). White solid; mp 273.2-274.6 °C. <sup>1</sup>H NMR (CDCl<sub>3</sub>, 500 MHz, ppm): δ 7.93 (d, *J* = 8.3 Hz, 2H), 7.44 (t, *J* = 7.5 Hz, 1H), 7.39-7.33 (m, 4H), 7.15 (d, *J* = 7.2 Hz, 2H), 6.43 (s, 4H), 2.83 (s, 3H), 2.44 (s, 3H); <sup>13</sup>C NMR (CDCl<sub>3</sub>, 125 MHz, ppm): δ 183.1, 163.6, 161.5, 145.6, 142.3, 137.0, 136.2, 134.3, 130.3, 129.7, 129.3, 128.6, 128.0, 127.8, 68.2, 26.4, 21.8; HRMS calc. for C<sub>23</sub>H<sub>19</sub>NO<sub>4</sub>SNa (M+Na)<sup>+</sup>, 428.0932; found, 428.0935.

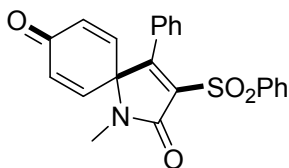

**1-methyl-4-phenyl-3-(phenylsulfonyl)-1-azaspiro[4.5]deca-3,6,9-triene-2,8-dione (3b)**, Compound **3b** was obtained in 60% yield according to the general procedure (8h). White solid; mp 215.7-217.0 °C. <sup>1</sup>H NMR (CDCl<sub>3</sub>, 500 MHz, ppm): δ 8.05 (d, *J* = 8.1 Hz, 2H), 7.66 (d, *J* = 7.5 Hz, 1H), 7.55 (t, *J* = 8.1 Hz, 2H), 7.44 (t, *J* = 8.5 Hz, 1H), 7.38 (t, *J* = 7.8 Hz, 2H), 7.15 (d, *J* = 7.1 Hz, 2H), 6.44 (s, 4H), 2.83 (s, 3H); <sup>13</sup>C NMR (CDCl<sub>3</sub>, 125 MHz, ppm): δ 183.1, 163.5, 162.1, 142.2, 139.2, 136.7, 134.4, 130.4, 129.2, 129.1, 128.6, 128.0, 127.8, 68.3, 26.4; HRMS calc. for C<sub>22</sub>H<sub>17</sub>NO<sub>4</sub>SNa (M+Na)<sup>+</sup>, 414.0776; found, 414.0777.

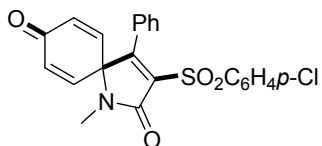

**3-(4-chlorophenylsulfonyl)-1-methyl-4-phenyl-1-azaspiro[4.5]deca-3,6,9-triene-2,8-dione (3c)**, Compound **3c** was obtained in 55% yield according to the general procedure (10 h). Yellow solid; mp 267.9-268.6 °C. <sup>1</sup>H NMR (CDCl<sub>3</sub>, 500 MHz, ppm): δ 7.99 (d, *J* = 8.7 Hz, 2H), 7.52 (d, *J* = 8.7 Hz, 2H), 7.46 (t, *J* = 7.5 Hz, 1H), 7.39 (t, *J* = 7.9 Hz, 2H), 7.15 (d, *J* = 7.1 Hz, 2H), 6.47-6.42 (m, 4H), 2.84 (s, 3H); <sup>13</sup>C NMR (CDCl<sub>3</sub>, 125 MHz, ppm): δ 183.0, 163.4, 162.4, 142.0, 141.3, 137.5, 136.4, 134.5, 130.8, 130.6, 129.4, 128.4,

128.1, 127.8, 68.4, 26.4; HRMS calc. for  $C_{22}H_{16}^{35}ClNO_4SNa$  ( $M+Na$ )<sup>+</sup>, 448.0386; found, 448.0384.

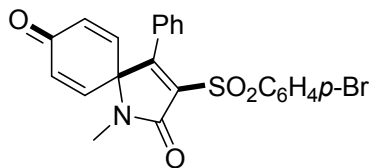

**3-(4-bromophenylsulfonyl)-1-methyl-4-phenyl-1-azaspiro[4.5]deca-3,6,9-triene-2,8-dione (3d)**, Compound **3d** was obtained in 85% yield according to the general procedure (12h). Yellow solid; mp 274.4-275.2 °C. <sup>1</sup>H NMR (CDCl<sub>3</sub>, 500 MHz, ppm): δ 7.91 (d, *J* = 8.7 Hz, 2H), 7.69 (d, *J* = 8.7 Hz, 2H), 7.46 (t, *J* = 7.5 Hz, 1H), 7.39 (t, *J* = 7.9 Hz, 2H), 7.14 (d, *J* = 7.1 Hz, 2H), 6.47-6.42 (m, 4H), 2.84 (s, 3H); <sup>13</sup>C NMR (CDCl<sub>3</sub>, 125 MHz, ppm): δ 182.9, 163.4, 162.5, 142.0, 138.1, 136.3, 134.5, 132.4, 130.8, 130.6, 130.1, 128.4, 128.1, 127.8, 68.4, 26.4; HRMS calc. for  $C_{22}H_{16}^{79}BrNO_4SNa$  ( $M+Na$ )<sup>+</sup>, 491.9881; found, 491.9883.

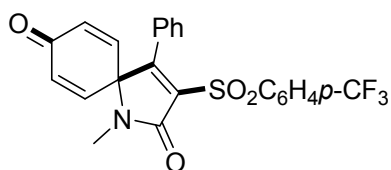

**1-methyl-4-phenyl-3-(4-(trifluoromethyl)phenylsulfonyl)-1-azaspiro[4.5]deca-3,6,9-triene-2,8-dione (3e)**, Compound **3e** was obtained in 81% yield according to the general procedure (6h). Yellow solid; mp 254.7-255.5 °C. <sup>1</sup>H NMR (CDCl<sub>3</sub>, 500 MHz, ppm): δ 8.19 (d, *J* = 8.2 Hz, 2H), 7.81 (d, *J* = 8.4 Hz, 2H), 7.47 (t, *J* = 7.5 Hz, 1H), 7.40 (t, *J* = 7.9 Hz, 2H), 7.16 (d, *J* = 7.4 Hz, 2H), 6.48-6.42 (m, 4H), 2.84 (s, 3H); <sup>13</sup>C NMR (CDCl<sub>3</sub>, 125 MHz, ppm): δ 182.9, 163.3 (d, *J* = 6.8 Hz), 142.6, 141.8, 136.0, 135.7, 134.5, 130.7, 129.9, 128.2, 128.1, 127.8, 126.2 (q, *J* = 3.7 Hz), 123.1 (d, *J* = 271.6 Hz), 68.5, 26.4; HRMS calc. for  $C_{23}H_{16}F_3NO_4SNa$  ( $M+Na$ )<sup>+</sup>, 482.0650; found, 482.0655.

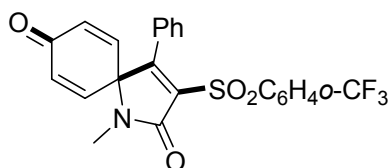

**1-methyl-4-phenyl-3-(2-(trifluoromethyl)phenylsulfonyl)-1-azaspiro[4.5]deca-3,6,9-triene-2,8-dione (3f)**, Compound **3f** was obtained in 80% yield according to the general procedure (8h). White solid; mp 219.6-220.9 °C. <sup>1</sup>H NMR (CDCl<sub>3</sub>, 500 MHz, ppm): δ

8.52 (d,  $J = 7.4$  Hz, 1H), 7.82-7.78 (m, 3H), 7.44 (t,  $J = 7.5$  Hz, 1H), 7.38 (t,  $J = 7.9$  Hz, 2H), 7.30 (d,  $J = 7.3$  Hz, 2H), 6.51-6.45 (m, 4H), 2.79 (s, 3H);  $^{13}\text{C}$  NMR ( $\text{CDCl}_3$ , 125 MHz, ppm):  $\delta$  183.2, 162.3, 161.4, 142.2, 137.4, 136.0, 134.4, 134.2, 132.2, 130.8, 128.7 (d,  $J = 33.3$  Hz), 128.3, 128.1, 128.1, 128.0 (q,  $J = 6.0$  Hz), 122.9 (d,  $J = 272.9$  Hz), 68.0, 26.2; HRMS calc. for  $\text{C}_{23}\text{H}_{16}\text{F}_3\text{NO}_4\text{SNa}$  ( $\text{M}+\text{Na}$ ) $^+$ , 482.0650; found, 482.0653.

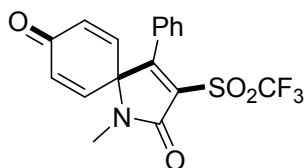

**1-methyl-4-phenyl-3-(trifluoromethylsulfonyl)-1-azaspiro[4.5]deca-3,6,9-triene-2,8-dione (3g)**, Compound **3g** was obtained in 37% yield according to the general procedure (24h). White solid; mp 198.7-200.4 °C.  $^1\text{H}$  NMR ( $\text{CDCl}_3$ , 500 MHz, ppm):  $\delta$  7.41-7.38 (m, 5H), 6.54-6.49 (m, 4H), 2.95 (s, 3H);  $^{13}\text{C}$  NMR ( $\text{CDCl}_3$ , 125 MHz, ppm):  $\delta$  183.7, 165.8, 151.3, 144.1, 133.5, 130.3, 130.2, 128.8, 127.8, 119.9, 68.3, 26.7; HRMS calc. for  $\text{C}_{17}\text{H}_{12}\text{F}_3\text{NO}_4\text{SNa}$  ( $\text{M}+\text{Na}$ ) $^+$ , 406.0337; found, 406.0341.

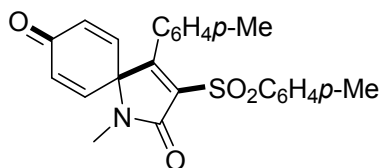

**1-methyl-4-p-tolyl-3-tosyl-1-azaspiro[4.5]deca-3,6,9-triene-2,8-dione (3h)**, Compound **3h** was obtained in 52% yield according to the general procedure (6h). Yellow solid; mp 213.5-215.1 °C.  $^1\text{H}$  NMR ( $\text{CDCl}_3$ , 500 MHz, ppm):  $\delta$  7.93 (d,  $J = 8.3$  Hz, 2H), 7.34 (d,  $J = 8.1$  Hz, 2H), 7.17 (d,  $J = 7.9$  Hz, 2H), 7.07 (d,  $J = 8.2$  Hz, 2H), 6.45-6.40 (m, 4H), 2.81 (s, 3H), 2.44 (s, 3H), 2.37 (s, 3H);  $^{13}\text{C}$  NMR ( $\text{CDCl}_3$ , 125 MHz, ppm):  $\delta$  183.2, 163.7, 161.9, 145.5, 142.5, 140.8, 136.5, 136.3, 134.2, 129.7, 129.3, 128.7, 127.8, 125.7, 68.2, 26.3, 21.8, 21.5; HRMS calc. for  $\text{C}_{24}\text{H}_{21}\text{NO}_4\text{SNa}$  ( $\text{M}+\text{Na}$ ) $^+$ , 442.1089; found, 442.1091.

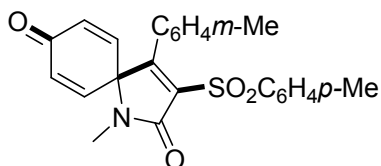

**1-methyl-4-m-tolyl-3-tosyl-1-azaspiro[4.5]deca-3,6,9-triene-2,8-dione(3i)**, Compound **3i** was obtained in 60% yield according to the general procedure (20h). Yellow solid; mp 266.7-268.4 °C.  $^1\text{H}$  NMR ( $\text{CDCl}_3$ , 400 MHz, ppm):  $\delta$  7.92 (d,  $J = 8.3$  Hz, 2H), 7.34 (d,  $J$

= 8.1 Hz, 2H), 7.25-7.22 (m, 2H), 6.94-6.91 (m, 2H), 6.45-6.40 (m, 4H), 2.82 (s, 3H), 2.44 (s, 3H), 2.35 (s, 3H);  $^{13}\text{C}$  NMR ( $\text{CDCl}_3$ , 125 MHz, ppm):  $\delta$  183.2, 163.7, 161.8, 145.5, 142.4, 137.6, 136.7, 136.3, 134.2, 131.2, 130.0, 129.3, 128.6, 128.4, 127.8, 124.8, 68.2, 26.3, 21.8, 21.4; HRMS calc. for  $\text{C}_{24}\text{H}_{21}\text{NO}_4\text{SNa}$  ( $\text{M}+\text{Na}$ ) $^+$ , 442.1089; found, 442.1091.

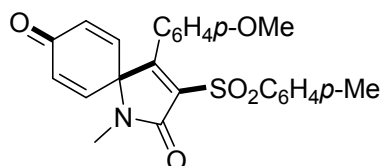

**4-(4-methoxyphenyl)-1-methyl-3-tosyl-1-azaspiro[4.5]deca-3,6,9-triene-2,8-dione (3j),** Compound **3j** was obtained in 81% yield according to the general procedure (6h). White solid; mp 216.5-218.3 °C.  $^1\text{H}$  NMR ( $\text{CDCl}_3$ , 500 MHz, ppm):  $\delta$  7.94 (d,  $J$  = 8.3 Hz, 2H), 7.34 (d,  $J$  = 8.0 Hz, 2H), 7.19 (d,  $J$  = 8.9 Hz, 2H), 6.88 (d,  $J$  = 8.9 Hz, 2H), 6.48-6.40 (m, 4H), 3.83 (s, 3H), 2.80 (s, 3H), 2.44 (s, 3H);  $^{13}\text{C}$  NMR ( $\text{CDCl}_3$ , 125 MHz, ppm):  $\delta$  183.3, 163.8, 161.5, 161.4, 145.4, 142.8, 136.4, 135.9, 134.1, 129.8, 129.7, 129.3, 120.7, 113.6, 68.1, 55.3, 26.2, 21.8; HRMS calc. for  $\text{C}_{24}\text{H}_{21}\text{NO}_5\text{SNa}$  ( $\text{M}+\text{Na}$ ) $^+$ , 458.1038; found, 458.1037.

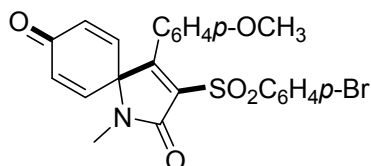

**3-(4-bromophenylsulfonyl)-4-(4-methoxyphenyl)-1-methyl-1-azaspiro[4.5]deca-3,6,9-triene-2,8-dione (3k),** Compound **3k** was obtained in 53% yield according to the general procedure (10h). White solid; mp 223.0-224.1 °C.  $^1\text{H}$  NMR ( $\text{CDCl}_3$ , 500 MHz, ppm):  $\delta$  7.92 (d,  $J$  = 8.7 Hz, 2H), 7.68 (d,  $J$  = 8.7 Hz, 2H), 7.19 (d,  $J$  = 8.9 Hz, 2H), 6.89 (d,  $J$  = 8.3 Hz, 2H), 6.48 (d,  $J$  = 10.3 Hz, 2H), 6.41 (d,  $J$  = 10.3 Hz, 2H), 3.83 (s, 3H), 2.80 (s, 3H);  $^{13}\text{C}$  NMR ( $\text{CDCl}_3$ , 125 MHz, ppm):  $\delta$  183.1, 163.6, 162.4, 161.6, 142.5, 138.2, 135.2, 134.2, 132.3, 130.9, 130.0, 129.8, 120.5, 113.7, 68.2, 55.3, 26.2; HRMS calc. for  $\text{C}_{23}\text{H}_{18}^{79}\text{BrNO}_5\text{SNa}$  ( $\text{M}+\text{Na}$ ) $^+$ , 521.9987; found, 521.9989.

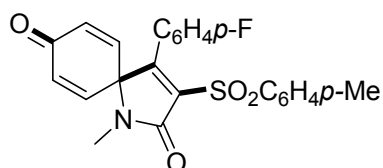

**4-(4-fluorophenyl)-1-methyl-3-tosyl-1-azaspiro[4.5]deca-3,6,9-triene-2,8-dione (3l),**

Compound **3l** was obtained in 61% yield according to the general procedure (6h). White solid; mp 267.8-268.1 °C. <sup>1</sup>H NMR (CDCl<sub>3</sub>, 500 MHz, ppm): δ 7.92 (d, *J* = 8.3 Hz, 2H), 7.35 (d, *J* = 8.1 Hz, 2H), 7.19-7.16 (m, 2H), 7.08 (t, *J* = 8.5 Hz, 2H), 6.46 (t, *J* = 8.2 Hz, 2H), 6.42 (t, *J* = 8.6 Hz, 2H), 2.82 (s, 3H), 2.45 (s, 3H); <sup>13</sup>C NMR (CDCl<sub>3</sub>, 125 MHz, ppm): δ 182.9, 163.8 (d, *J* = 250.5 Hz), 163.4, 160.3, 145.8, 142.2, 137.3, 136.0, 134.5, 130.1 (d, *J* = 8.6 Hz), 129.8, 129.3, 124.5 (d, *J* = 3.6 Hz), 115.5 (d, *J* = 22.0 Hz), 68.2, 26.4, 21.8; HRMS calc. for C<sub>23</sub>H<sub>18</sub>FNO<sub>4</sub>SNa (M+Na)<sup>+</sup>, 446.0838; found, 446.0839.

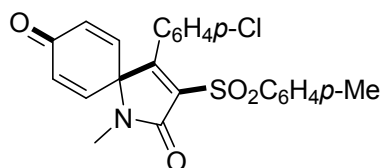

**4-(4-chlorophenyl)-1-methyl-3-tosyl-1-azaspiro[4.5]deca-3,6,9-triene-2,8-dione (3m),**

Compound **3m** was obtained in 53% yield according to the general procedure (6h). Yellow solid; mp 231.2-232.7 °C. <sup>1</sup>H NMR (CDCl<sub>3</sub>, 500 MHz, ppm): δ 7.92 (d, *J* = 8.4 Hz, 2H), 7.37-7.34 (m, 4H), 7.11 (d, *J* = 8.6 Hz, 2H), 6.47-6.40 (m, 4H), 2.82 (s, 3H), 2.45 (s, 3H); <sup>13</sup>C NMR (CDCl<sub>3</sub>, 125 MHz, ppm): δ 182.9, 163.3, 160.1, 145.8, 142.1, 137.5, 136.8, 135.9, 134.5, 129.8, 129.3, 129.3, 128.5, 127.0, 68.1, 26.4, 21.8; HRMS calc. for C<sub>23</sub>H<sub>18</sub><sup>35</sup>ClNO<sub>4</sub>SNa (M+Na)<sup>+</sup>, 462.0543; found, 462.0544.

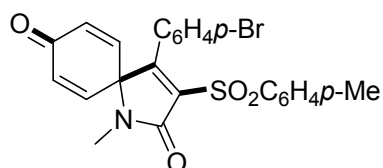

**4-(4-bromophenyl)-1-methyl-3-tosyl-1-azaspiro[4.5]deca-3,6,9-triene-2,8-dione (3n),**

Compound **3n** was obtained in 49% yield according to the general procedure (7h). Yellow solid; mp 258.1-259.4 °C. <sup>1</sup>H NMR (CDCl<sub>3</sub>, 500 MHz, ppm): δ 7.91 (d, *J* = 8.1 Hz, 2H), 7.51 (d, *J* = 8.3 Hz, 2H), 7.35 (d, *J* = 8.1 Hz, 2H), 7.04 (d, *J* = 8.4 Hz, 2H), 6.46 (d, *J* = 10.1 Hz, 2H), 6.40 (d, *J* = 10.1 Hz, 2H), 2.82 (s, 3H), 2.45 (s, 3H); <sup>13</sup>C NMR (CDCl<sub>3</sub>, 125 MHz, ppm): δ 182.8, 163.3, 160.0, 145.8, 142.0, 137.5, 135.9, 134.6, 131.4, 129.8, 129.4, 129.4, 127.5, 125.2, 68.0, 26.4, 21.8; HRMS calc. for C<sub>23</sub>H<sub>18</sub><sup>79</sup>BrNO<sub>4</sub>SNa (M+Na)<sup>+</sup>, 506.0038; found, 506.0041.

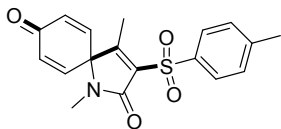

**1,4-dimethyl-3-tosyl-1-azaspiro[4.5]deca-3,6,9-triene-2,8-dione**, Compound **3o** was obtained in 25% yield according to the general procedure (24h). White solid; mp 231.2-232.4 °C.  $^1\text{H}$  NMR ( $\text{CDCl}_3$ , 500 MHz, ppm):  $\delta$  8.01 (d,  $J$  = 8.2 Hz, 2H), 7.37 (d,  $J$  = 8.1 Hz, 2H), 6.61 (d,  $J$  = 10.0 Hz, 2H), 6.29 (d,  $J$  = 10.1 Hz, 2H), 2.77 (s, 3H), 2.45 (s, 3H), 2.31 (s, 3H);  $^{13}\text{C}$  NMR ( $\text{CDCl}_3$ , 125 MHz, ppm):  $\delta$  183.3, 163.8, 161.2, 145.6, 143.4, 136.4, 135.6, 134.5, 129.8, 129.0, 68.2, 26.3, 21.8, 12.1; HRMS calc. for  $\text{C}_{18}\text{H}_{17}\text{NO}_4\text{SNa}$  ( $\text{M}+\text{Na}$ ) $^+$ , 366.0776; found, 366.0779.

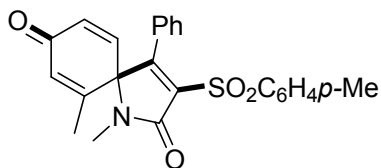

**1,6-dimethyl-4-phenyl-3-tosyl-1-azaspiro[4.5]deca-3,6,9-triene-2,8-dione (3p)**, Compound **3o** was obtained in 80% yield according to the general procedure (10h). Yellow solid; mp 219.1-220.7 °C.  $^1\text{H}$  NMR ( $\text{CDCl}_3$ , 500 MHz, ppm):  $\delta$  7.92 (d,  $J$  = 8.3 Hz, 2H), 7.45 (t,  $J$  = 8.4 Hz, 1H), 7.37 (t,  $J$  = 8.0 Hz, 2H), 7.34 (d,  $J$  = 8.1 Hz, 2H), 7.16 (d,  $J$  = 7.2 Hz, 2H), 6.44-6.31 (m, 3H), 2.73 (s, 3H), 2.44 (s, 3H), 1.73 (s, 3H);  $^{13}\text{C}$  NMR ( $\text{CDCl}_3$ , 125 MHz, ppm):  $\delta$  183.8, 164.0, 161.7, 150.7, 145.5, 142.4, 137.4, 136.3, 133.9, 133.0, 130.7, 129.7, 129.2, 128.4, 128.1, 127.8, 70.5, 26.0, 21.8, 17.7; HRMS calc. for  $\text{C}_{24}\text{H}_{21}\text{NO}_4\text{SNa}$  ( $\text{M}+\text{Na}$ ) $^+$ , 442.1089; found, 442.1092.

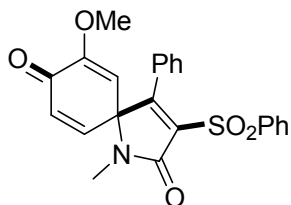

**7-methoxy-1-methyl-4-phenyl-3-(phenylsulfonyl)-1-azaspiro[4.5]deca-3,6,9-triene-2,8-dione (3q)**, Compound **3p** was obtained in 64% yield according to the general procedure (8h). Yellow solid; mp 238.1-239.8 °C.  $^1\text{H}$  NMR ( $\text{CDCl}_3$ , 500 MHz, ppm):  $\delta$  8.06 (t,  $J$  = 7.3 Hz, 2H), 7.66 (d,  $J$  = 7.4 Hz, 1H), 7.55 (t,  $J$  = 8.1 Hz, 2H), 7.42 (d,  $J$  = 7.5 Hz, 1H), 7.37 (t,  $J$  = 7.8 Hz, 2H), 7.12 (t,  $J$  = 7.2 Hz, 2H), 6.42 (s, 2H), 5.28 (s, 1H), 3.66 (s, 3H), 2.82 (s, 3H);  $^{13}\text{C}$  NMR ( $\text{CDCl}_3$ , 125 MHz, ppm):  $\delta$  178.7, 163.3, 163.2, 154.6,

142.9, 139.3, 136.1, 134.3, 133.8, 130.3, 129.3, 129.1, 128.9, 128.7, 128.0, 127.7, 108.5, 69.7, 55.7, 26.2; HRMS calc. for  $C_{23}H_{19}NO_5SNa$  ( $M+Na$ )<sup>+</sup>, 444.0882; found, 444.0883.

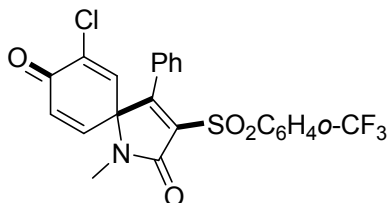

**7-chloro-1-methyl-4-phenyl-3-(2-(trifluoromethyl)phenylsulfonyl)-1-**

**azaspiro[4.5]deca-3,6,9-triene-2,8-dione (3q)**, Compound **3r** was obtained in 71% yield according to the general procedure (10h). White solid; mp 196.7-198.5 °C. <sup>1</sup>H NMR (CDCl<sub>3</sub>, 500 MHz, ppm): δ 8.50 (d, *J* = 7.2 Hz, 1H), 7.83-7.79 (m, 3H), 7.46 (t, *J* = 7.5 Hz, 1H), 7.39 (t, *J* = 7.9 Hz, 2H), 7.27-7.25 (m, 2H), 6.66 (d, *J* = 2.8 Hz, 1H), 6.56-6.51 (m, 2H), 2.81 (s, 3H); <sup>13</sup>C NMR (CDCl<sub>3</sub>, 125 MHz, ppm): δ 176.4, 162.9, 160.5, 142.9, 137.9, 137.8, 136.7 (d, *J* = 119.6 Hz), 134.3 (d, *J* = 16.7 Hz), 133.3, 132.2, 131.0, 128.8, 128.7 (d, *J* = 33.2 Hz), 128.3, 128.0, 127.9, 122.9 (d, *J* = 272.9 Hz), 69.7, 26.4; HRMS calc. for  $C_{23}H_{15}^{35}ClF_3NO_4SNa$  ( $M+Na$ )<sup>+</sup>, 516.0260; found, 516.0261.

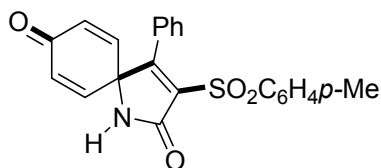

**4-phenyl-3-tosyl-1-azaspiro[4.5]deca-3,6,9-triene-2,8-dione (3s)**, Compound **3r** was obtained in 24% yield according to the general procedure (24h). Grey oil. <sup>1</sup>H NMR (CDCl<sub>3</sub>, 500 MHz, ppm): δ 7.87 (d, *J* = 8.3 Hz, 2H), 7.44 (t, *J* = 7.4 Hz, 1H), 7.37 (t, *J* = 7.8 Hz, 2H), 7.32 (d, *J* = 8.2 Hz, 2H), 7.11 (d, *J* = 7.4 Hz, 2H), 6.56 (s, 1H), 6.55 (d, *J* = 10.0 Hz, 2H), 6.31 (d, *J* = 10.0 Hz, 2H), 2.44 (s, 3H); <sup>13</sup>C NMR (CDCl<sub>3</sub>, 125 MHz, ppm): δ 183.2, 165.5, 164.6, 145.6, 142.5, 136.3, 136.3, 132.6, 130.4, 129.8, 129.2, 128.4, 128.0, 127.8, 64.0, 21.8; HRMS calc. for  $C_{22}H_{17}NO_4SNa$  ( $M+Na$ )<sup>+</sup>, 414.0770; found, 414.0764.

**Characterization data of products 5a-5q**

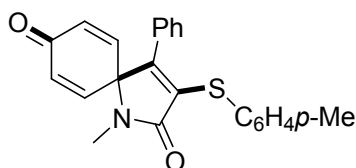

**1-methyl-4-phenyl-3-(p-tolylthio)-1-azaspiro[4.5]deca-3,6,9-triene-2,8-dione**

Compound **5a** was obtained in 87% yield according to the general procedure (12h). Yellow solid; mp 159.3-160.2 °C. <sup>1</sup>H NMR (CDCl<sub>3</sub>, 500 MHz, ppm): δ 7.31-7.28 (m, 1H), 7.25-7.20 (m, 2H), 7.23-7.19 (m, 4H), 6.99 (d, *J* = 8.0 Hz, 2H), 6.51 (d, *J* = 10.2 Hz, 2H), 6.45 (d, *J* = 10.3 Hz, 2H), 2.88 (s, 3H), 2.26 (s, 3H); <sup>13</sup>C NMR (CDCl<sub>3</sub>, 125MHz, ppm): δ 184.0, 167.8, 151.7, 145.3, 137.8, 133.1, 132.8, 131.7, 130.8, 129.7, 129.5, 128.3, 128.2, 127.7, 67.7, 26.3, 21.1; HRMS calc. for C<sub>23</sub>H<sub>19</sub>NO<sub>2</sub>SNa (M+Na)<sup>+</sup>, 396.1034; found, 396.1036.

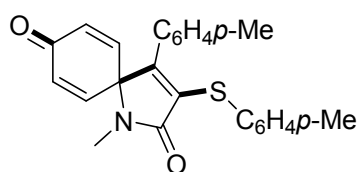

**1-methyl-4-p-tolyl-3-(p-tolylthio)-1-azaspiro[4.5]deca-3,6,9-triene-2,8-dione,**

Compound **5b** was obtained in 69% yield according to the general procedure (12h). Yellow solid; mp 183.9-184.5 °C. <sup>1</sup>H NMR (CDCl<sub>3</sub>, 500 MHz, ppm): δ 7.21 (d, *J* = 7.9 Hz, 2H), 7.15 (d, *J* = 7.9 Hz, 2H), 7.07 (d, *J* = 7.9 Hz, 2H), 7.00 (d, *J* = 7.9 Hz, 2H), 6.51 (d, *J* = 10.1 Hz, 2H), 6.46 (d, *J* = 10.1 Hz, 2H), 2.86 (s, 3H), 2.31 (s, 3H), 2.27 (s, 3H); <sup>13</sup>C NMR (CDCl<sub>3</sub>, 125MHz, ppm): δ 184.1, 167.8, 152.3, 145.5, 139.9, 137.7, 133.1, 132.0, 131.5, 129.7, 129.0, 128.1, 128.0, 127.8, 67.6, 26.2, 21.3, 21.1; HRMS calc. for C<sub>24</sub>H<sub>21</sub>NO<sub>2</sub>SNa (M+Na)<sup>+</sup>, 410.1191; found, 410.1195.

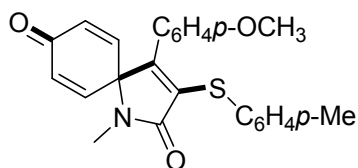

**4-(4-methoxyphenyl)-1-methyl-3-(p-tolylthio)-1-azaspiro[4.5]deca-3,6,9-triene-2,8-**

**dione**, Compound **5c** was obtained in 65% yield according to the general procedure (12h). Yellow solid; mp 145.1-145.9 °C. <sup>1</sup>H NMR (CDCl<sub>3</sub>, 500 MHz, ppm): δ 7.28 (t, *J* = 8.6 Hz, 2H), 7.21 (d, *J* = 7.9 Hz, 2H), 7.02 (d, *J* = 7.8 Hz, 2H), 6.78 (d, *J* = 8.6 Hz, 2H), 6.51 (d, *J* = 10.2 Hz, 2H), 6.48 (d, *J* = 10.2 Hz, 2H), 3.78 (s, 3H), 2.86 (s, 3H), 2.28 (s, 3H); <sup>13</sup>C NMR (CDCl<sub>3</sub>, 125 MHz, ppm): δ 184.1, 167.9, 160.7, 152.2, 145.7, 137.6, 133.0,

131.1, 130.9, 130.0, 129.7, 128.3, 123.1, 113.8, 67.4, 55.3, 26.1, 21.1; HRMS calc. for  $C_{24}H_{21}NO_3SNa$  ( $M+Na$ )<sup>+</sup>, 426.1140; found, 426.1143.

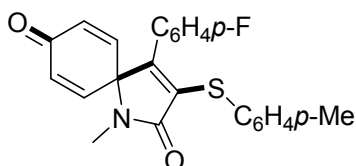

**4-(4-fluorophenyl)-1-methyl-3-(p-tolylthio)-1-azaspiro[4.5]deca-3,6,9-triene-2,8-dione**, Compound **5d** was obtained in 70% yield according to the general procedure (12h). Yellow solid; mp 144.4-145.7 °C. <sup>1</sup>H NMR (CDCl<sub>3</sub>, 500 MHz, ppm):  $\delta$  7.18 (d,  $J$  = 7.9 Hz, 4H), 6.98 (d,  $J$  = 7.9 Hz, 2H), 6.91 (t,  $J$  = 8.5 Hz, 2H), 6.50 (d,  $J$  = 10.1 Hz, 2H), 6.50 (d,  $J$  = 10.1 Hz, 2H), 2.88 (s, 3H), 2.27 (s, 3H); <sup>13</sup>C NMR (CDCl<sub>3</sub>, 125 MHz, ppm):  $\delta$  183.8, 167.7, 163.1 (d,  $J$  = 249.4 Hz), 149.7, 145.2, 138.1, 133.3, 133.2, 131.9, 130.2 (d,  $J$  = 33.5 Hz), 129.7, 127.2, 126.7 (d,  $J$  = 13.7 Hz), 115.5 (d,  $J$  = 21.7 Hz), 67.7, 26.3, 21.1; HRMS calc. for  $C_{23}H_{18}FNO_2SNa$  ( $M+Na$ )<sup>+</sup>, 414.0940; found, 414.0937.

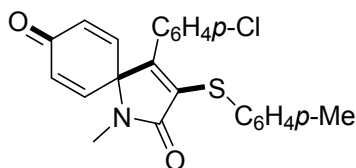

**4-(4-chlorophenyl)-1-methyl-3-(p-tolylthio)-1-azaspiro[4.5]deca-3,6,9-triene-2,8-dione**, Compound **5e** was obtained in 57% yield according to the general procedure (12h). Yellow oil; <sup>1</sup>H NMR (CDCl<sub>3</sub>, 500 MHz, ppm):  $\delta$  7.10 (d,  $J$  = 7.6 Hz, 4H), 7.01 (d,  $J$  = 8.3 Hz, 2H), 6.90 (d,  $J$  = 7.9 Hz, 2H), 6.42 (d,  $J$  = 10.0 Hz, 2H), 6.38 (d,  $J$  = 10.1 Hz, 2H), 2.81 (s, 3H), 2.20 (s, 3H); <sup>13</sup>C NMR (CDCl<sub>3</sub>, 125 MHz, ppm):  $\delta$  182.7, 166.5, 147.7, 144.0, 137.3, 134.5, 132.8, 132.2, 131.2, 128.7, 128.5, 128.0, 127.5, 125.7, 66.6, 25.3, 20.1; HRMS calc. for  $C_{23}H_{18}^{35}ClNO_2SNa$  ( $M+Na$ )<sup>+</sup>, 430.0644; found, 430.0649.

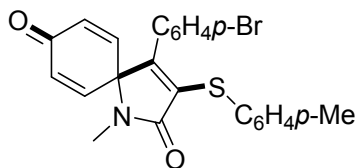

**4-(4-bromophenyl)-1-methyl-3-(p-tolylthio)-1-azaspiro[4.5]deca-3,6,9-triene-2,8-dione**, Compound **5f** was obtained in 53% yield according to the general procedure (12h).

Yellow oil;  $^1\text{H}$  NMR ( $\text{CDCl}_3$ , 500 MHz, ppm):  $\delta$  7.32 (d,  $J$  = 8.4 Hz, 2H), 7.16 (d,  $J$  = 8.0 Hz, 2H), 7.00 (d,  $J$  = 8.4 Hz, 2H), 6.96 (d,  $J$  = 7.9 Hz, 2H), 6.48 (d,  $J$  = 10.2 Hz, 2H), 6.45 (d,  $J$  = 10.2 Hz, 2H), 2.88 (s, 3H), 2.28 (s, 3H);  $^{13}\text{C}$  NMR ( $\text{CDCl}_3$ , 125 MHz, ppm):  $\delta$  183.7, 167.5, 148.5, 145.0, 138.4, 133.9, 133.3, 132.3, 131.4, 129.8, 129.7, 129.5, 126.6, 123.8, 67.6, 26.3, 21.2; HRMS calc. for  $\text{C}_{23}\text{H}_{18}^{79}\text{BrNO}_2\text{SNa}$  ( $\text{M}+\text{Na}$ ) $^+$ , 474.0139; found, 474.0141.

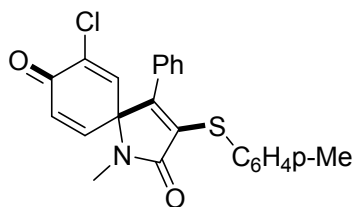

**7-chloro-1-methyl-4-phenyl-3-(p-tolylthio)-1-azaspiro[4.5]deca-3,6,9-triene-2,8-dione**, Compound **5g** was obtained in 71% yield according to the general procedure (12h). Yellow solid; mp 169.8-171.6 °C.  $^1\text{H}$  NMR ( $\text{CDCl}_3$ , 500 MHz, ppm):  $\delta$  7.30 (t,  $J$  = 7.1 Hz, 1H), 7.24 (d,  $J$  = 7.3 Hz, 2H), 7.19 (d,  $J$  = 8.0 Hz, 2H), 7.13 (d,  $J$  = 7.5 Hz, 2H), 6.97 (d,  $J$  = 7.8 Hz, 2H), 6.72 (d,  $J$  = 2.2 Hz, 1H), 6.55-6.49 (m, 2H), 2.90 (s, 3H), 2.26 (s, 3H);  $^{13}\text{C}$  NMR ( $\text{CDCl}_3$ , 125 MHz, ppm):  $\delta$  177.2, 167.4, 150.0, 145.9, 141.0, 138.1, 136.3, 133.5, 132.2, 132.0, 130.2, 129.7, 129.6, 128.4, 128.2, 127.1, 69.5, 26.5, 21.1; HRMS calc. for  $\text{C}_{23}\text{H}_{18}^{35}\text{ClNO}_2\text{SNa}$  ( $\text{M}+\text{Na}$ ) $^+$ , 430.0644; found, 430.0641.

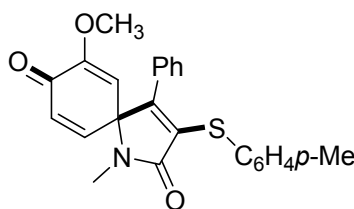

**(R)-7-methoxy-1-methyl-4-phenyl-3-(p-tolylthio)-1-azaspiro[4.5]deca-3,6,9-triene-2,8-dione**, Compound **5h** was obtained in 58% yield according to the general procedure (12h). Yellow oil.  $^1\text{H}$  NMR ( $\text{CDCl}_3$ , 500 MHz, ppm):  $\delta$  7.29 (t,  $J$  = 7.2 Hz, 1H), 7.25-7.21 (m, 4H), 7.18 (d,  $J$  = 7.5 Hz, 2H), 6.99 (d,  $J$  = 7.9 Hz, 2H), 6.52-6.44 (m, 2H), 5.35 (d,  $J$  = 2.1 Hz, 1H), 3.66 (s, 3H), 2.87 (s, 3H), 2.27 (s, 3H);  $^{13}\text{C}$  NMR ( $\text{CDCl}_3$ , 125 MHz, ppm):  $\delta$  179.5, 167.5, 153.8, 152.9, 146.0, 137.8, 132.3, 132.1, 131.8, 130.9, 129.7, 129.5, 128.3, 128.2, 127.8, 111.4, 69.1, 55.5, 26.0, 21.1; HRMS calc. for  $\text{C}_{24}\text{H}_{21}\text{NO}_3\text{SNa}$  ( $\text{M}+\text{Na}$ ) $^+$ , 426.1140; found, 426.1147.

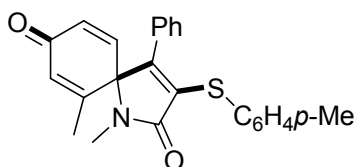

**(S)-1,6-dimethyl-4-phenyl-3-(p-tolylthio)-1-azaspiro[4.5]deca-3,6,9-triene-2,8-dione**, Compound **5i** was obtained in 87% yield according to the general procedure (12h). Yellow oil.  $^1\text{H}$  NMR ( $\text{CDCl}_3$ , 500 MHz, ppm):  $\delta$  7.34-7.32 (m, 1H), 7.29-7.25 (m, 4H), 7.23 (d,  $J = 8.0$  Hz, 2H), 7.02 (d,  $J = 7.9$  Hz, 2H), 6.49 (s, 2H), 6.37 (s, 1H), 2.79 (s, 3H), 2.29 (s, 3H), 1.78 (s, 3H);  $^{13}\text{C}$  NMR ( $\text{CDCl}_3$ , 125 MHz, ppm):  $\delta$  184.7, 168.1, 153.5, 152.1, 145.5, 137.8, 133.0, 132.6, 132.0, 131.5, 130.6, 129.8, 128.4, 128.1, 127.9, 69.7, 25.8, 21.1, 17.9; HRMS calc. for  $\text{C}_{24}\text{H}_{21}\text{NO}_2\text{SNa}$  ( $\text{M}+\text{Na}$ ) $^+$ , 410.1191; found, 410.1196.

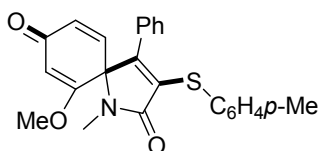

**6-methoxy-1-methyl-4-phenyl-3-(p-tolylthio)-1-azaspiro[4.5]deca-3,6,9-triene-2,8-dione**, Compound **5j** was obtained in 68% yield according to the general procedure (12h). Yellow oil.  $^1\text{H}$  NMR ( $\text{CDCl}_3$ , 500 MHz, ppm):  $\delta$  7.30-7.22 (m, 3H), 7.19-7.14 (m, 4H), 6.99 (d,  $J = 8.0$  Hz, 2H), 6.40-6.37 (dd,  $J_1 = 1.3$  Hz,  $J_2 = 9.8$  Hz, 1H), 6.30 (d,  $J = 9.8$  Hz, 1H), 5.76 (d,  $J = 1.1$  Hz, 1H), 3.74 (s, 3H), 2.78 (s, 3H), 2.26 (s, 3H);  $^{13}\text{C}$  NMR ( $\text{CDCl}_3$ , 125 MHz, ppm):  $\delta$  186.2, 168.7, 168.5, 152.8, 141.0, 137.3, 132.4, 132.2, 130.8, 130.6, 129.7, 129.5, 128.5, 128.3, 128.0, 106.2, 69.0, 56.3, 26.0, 21.1; HRMS calc. for  $\text{C}_{24}\text{H}_{21}\text{NO}_3\text{SNa}$  ( $\text{M}+\text{Na}$ ) $^+$ , 426.1140; found, 426.1146.

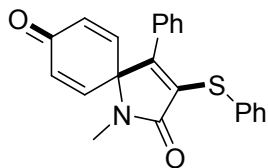

**1-methyl-4-phenyl-3-(phenylthio)-1-azaspiro[4.5]deca-3,6,9-triene-2,8-dione**, Compound **5k** was obtained in 56% yield according to the general procedure (12h). Yellow oil.  $^1\text{H}$  NMR ( $\text{CDCl}_3$ , 500 MHz, ppm):  $\delta$  7.29-7.23 (m, 7H), 7.20-7.17 (m, 3H), 6.53 (d,  $J = 10.0$  Hz, 2H), 6.47 (d,  $J = 10.1$  Hz, 2H), 2.89 (s, 3H);  $^{13}\text{C}$  NMR ( $\text{CDCl}_3$ , 125 MHz, ppm):  $\delta$  183.9, 167.7, 152.8, 145.1, 133.2, 132.2, 131.7, 131.0, 130.7, 129.7, 128.9,

128.3, 128.1, 127.5, 67.7, 26.3; HRMS calc. for  $C_{22}H_{17}NO_2SNa$  ( $M+Na$ )<sup>+</sup>, 382.0878; found, 382.0879.

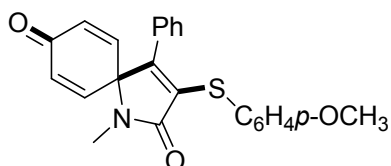

**3-(4-methoxyphenylthio)-1-methyl-4-phenyl-1-azaspiro[4.5]deca-3,6,9-triene-2,8-dione**, Compound **5l** was obtained in 50% yield according to the general procedure (12h). Yellow solid; mp 156.3-157.6 °C. <sup>1</sup>H NMR (CDCl<sub>3</sub>, 500 MHz, ppm): δ 7.28-7.27 (m, 2H), 7.24-7.22 (m, 3H), 7.17-7.15 (m, 2H), 6.69 (d, *J* = 8.9 Hz, 2H), 6.49 (d, *J* = 10.3 Hz, 2H), 6.43 (d, *J* = 10.2 Hz, 2H), 3.74 (s, 3H), 2.87 (s, 3H); <sup>13</sup>C NMR (CDCl<sub>3</sub>, 125 MHz, ppm): δ 184.0, 167.9, 159.8, 150.2, 145.3, 134.6, 133.5, 133.1, 130.7, 129.4, 128.3, 128.2, 121.1, 114.5, 67.7, 55.3, 26.3; HRMS calc. for  $C_{23}H_{19}NO_3SNa$  ( $M+Na$ )<sup>+</sup>, 412.0983; found, 412.0985.

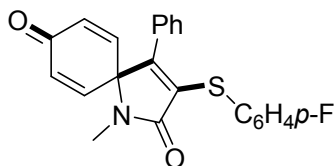

**3-(4-fluorophenylthio)-1-methyl-4-phenyl-1-azaspiro[4.5]deca-3,6,9-triene-2,8-dione**, Compound **5m** was obtained in 62% yield according to the general procedure (12h). Yellow solid; mp 126.7-127.6 °C. <sup>1</sup>H NMR (CDCl<sub>3</sub>, 500 MHz, ppm): δ 7.31-7.30 (m, 3H), 7.24 (d, *J* = 7.4 Hz, 2H), 7.17 (d, *J* = 7.5 Hz, 2H), 6.87 (d, *J* = 8.5 Hz, 2H), 6.51 (d, *J* = 10.0 Hz, 2H), 6.45 (d, *J* = 10.3 Hz, 2H), 2.88 (s, 3H); <sup>13</sup>C NMR (CDCl<sub>3</sub>, 125 MHz, ppm): δ 183.9, 167.6, 162.5, 151.6, 145.0, 134.2 (d, *J* = 8.3 Hz), 133.2, 132.7, 130.5, 129.7, 128.3, 128.2, 126.1 (d, *J* = 3.3 Hz), 116.1 (d, *J* = 22.0 Hz), 67.7, 26.3; HRMS calc. for  $C_{22}H_{16}FNO_2SNa$  ( $M+Na$ )<sup>+</sup>, 400.0783; found, 400.0788.

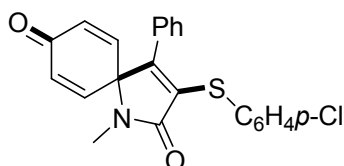

**3-(4-chlorophenylthio)-1-methyl-4-phenyl-1-azaspiro[4.5]deca-3,6,9-triene-2,8-dio,**

Compound **5n** was obtained in 71% yield according to the general procedure (12h). Yellow solid; mp 180.7-181.3 °C. <sup>1</sup>H NMR (CDCl<sub>3</sub>, 500 MHz, ppm): δ 7.35-7.32 (m, 1H), 7.29-7.26 (m, 2H), 7.24-7.19 (m, 4H), 7.15 (d, *J* = 8.7 Hz, 2H), 6.52-6.46 (m, 4H), 2.89 (s, 3H); <sup>13</sup>C NMR (CDCl<sub>3</sub>, 125 MHz, ppm): δ 183.8, 167.5, 152.9, 144.9, 133.9, 133.3, 132.7, 132.0, 130.5, 130.0, 129.9, 129.1, 128.4, 128.1, 67.8, 26.3; HRMS calc. for C<sub>22</sub>H<sub>16</sub><sup>35</sup>ClNO<sub>2</sub>SNa (M+Na)<sup>+</sup>, 416.0488; found, 416.0489.

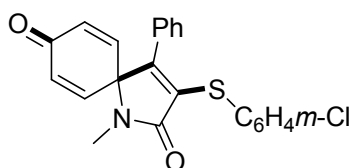**3-(3-chlorophenylthio)-1-methyl-4-phenyl-1-azaspiro[4.5]deca-3,6,9-triene-2,8-dione,**

Compound **5o** was obtained in 54% yield according to the general procedure (12h). Yellow solid; mp 187.9-189.3 °C. <sup>1</sup>H NMR (CDCl<sub>3</sub>, 500 MHz, ppm): δ 7.33-7.27 (m, 1H), 7.28-7.25 (m, 2H), 7.22-7.17 (m, 4H), 7.13-7.11 (m, 2H), 6.53 (d, *J* = 10.3 Hz, 2H), 6.48 (d, *J* = 10.3 Hz, 2H), 2.91 (s, 3H); <sup>13</sup>C NMR (CDCl<sub>3</sub>, 125 MHz, ppm): δ 183.8, 167.4, 153.4, 144.8, 134.6, 133.5, 133.3, 131.5, 130.7, 130.4, 129.9, 129.0, 128.4, 128.0, 127.7, 67.9, 26.4; HRMS calc. for C<sub>22</sub>H<sub>16</sub><sup>35</sup>ClNO<sub>2</sub>SNa (M+Na)<sup>+</sup>, 416.0488; found, 416.0486.

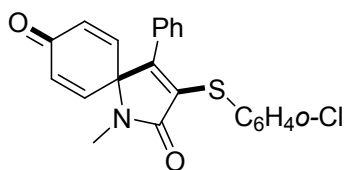**3-(2-chlorophenylthio)-1-methyl-4-phenyl-1-azaspiro[4.5]deca-3,6,9-triene-2,8-dione,**

Compound **5p** was obtained in 53% yield according to the general procedure (12h). Yellow solid; mp 138.4-140.0 °C. <sup>1</sup>H NMR (CDCl<sub>3</sub>, 500 MHz, ppm): δ 7.32-7.30 (m, 1H), 7.27-7.26 (m, 1H), 7.25-7.21 (m, 5H), 7.12-7.07 (m, 2H), 6.53 (d, *J* = 10.2 Hz, 2H), 6.46 (d, *J* = 10.2 Hz, 2H), 2.90 (s, 3H); <sup>13</sup>C NMR (CDCl<sub>3</sub>, 125 MHz, ppm): δ 184.0, 167.4, 152.0, 145.1, 135.8, 133.2, 131.1, 130.5, 130.2, 130.0, 129.7, 129.0, 128.3, 127.9, 127.0, 67.9, 26.3; HRMS calc. for C<sub>22</sub>H<sub>16</sub><sup>35</sup>ClNO<sub>2</sub>SNa (M+Na)<sup>+</sup>, 416.0488; found, 416.0489.

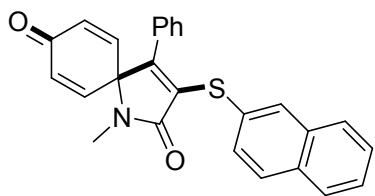

**1-methyl-3-(naphthalen-2-ylthio)-4-phenyl-1-azaspiro[4.5]deca-3,6,9-triene-2,8-dione**, Compound **5q** was obtained in 60% yield according to the general procedure (12h). Yellow solid; mp 153.4-154.0 °C.  $^1\text{H}$  NMR ( $\text{CDCl}_3$ , 500 MHz, ppm):  $\delta$  7.79 (d,  $J$  = 1.5 Hz, 1H), 7.74-7.72 (m, 1H), 7.68-7.66 (m, 1H), 7.63 (d,  $J$  = 8.6 Hz, 1H), 7.45-7.43 (m, 2H), 7.34-7.32 (m, 1H), 7.23-7.16 (m, 5H), 6.54 (d,  $J$  = 10.2 Hz, 2H), 6.46 (d,  $J$  = 10.2 Hz, 2H), 2.89 (s, 3H);  $^{13}\text{C}$  NMR ( $\text{CDCl}_3$ , 125 MHz, ppm):  $\delta$  183.9, 167.8, 152.5, 145.1, 133.4, 133.2, 132.5, 132.4, 130.7, 130.6, 130.0, 128.7, 128.6, 128.4, 128.2, 128.1, 127.7, 127.5, 126.5, 126.4, 67.8, 26.3; HRMS calc. for  $\text{C}_{26}\text{H}_{19}\text{NO}_2\text{SNa}$  ( $\text{M}+\text{Na}$ ) $^+$ , 432.1034; found, 432.1037.

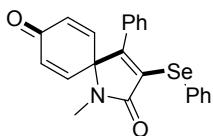

**1-methyl-4-phenyl-3-(phenylselanyl)-1-azaspiro[4.5]deca-3,6,9-triene-2,8-dione**, Compound **5r** was obtained in 63% yield according to the general procedure (12h). White solid; mp:128.1-129.4.  $^1\text{H}$  NMR ( $\text{CDCl}_3$ , 500 MHz, ppm):  $\delta$  7.31 (d,  $J$  = 7.3 Hz, 2H), 7.18 (t,  $J$  = 7.4 Hz, 1H), 7.13-7.08 (m, 3H), 7.05-7.01 (m, 4H), 6.43 (d,  $J$  = 10.2 Hz, 2H), 6.35 (d,  $J$  = 10.2 Hz, 2H), 2.83 (s, 3H);  $^{13}\text{C}$  NMR ( $\text{CDCl}_3$ , 125MHz, ppm):  $\delta$  182.9, 167.8, 153.1, 144.0, 132.9, 132.1, 130.2, 129.2, 128.4, 128.0, 127.2, 127.0, 126.9, 126.1, 68.0, 25.4; HRMS calc. for  $\text{C}_{22}\text{H}_{17}\text{NO}_2\text{SeNa}$  ( $\text{M}+\text{Na}$ ) $^+$ , 430.0322; found, 430.0318.

# 6.Copies of NMR spectra for 3a–5r 3a

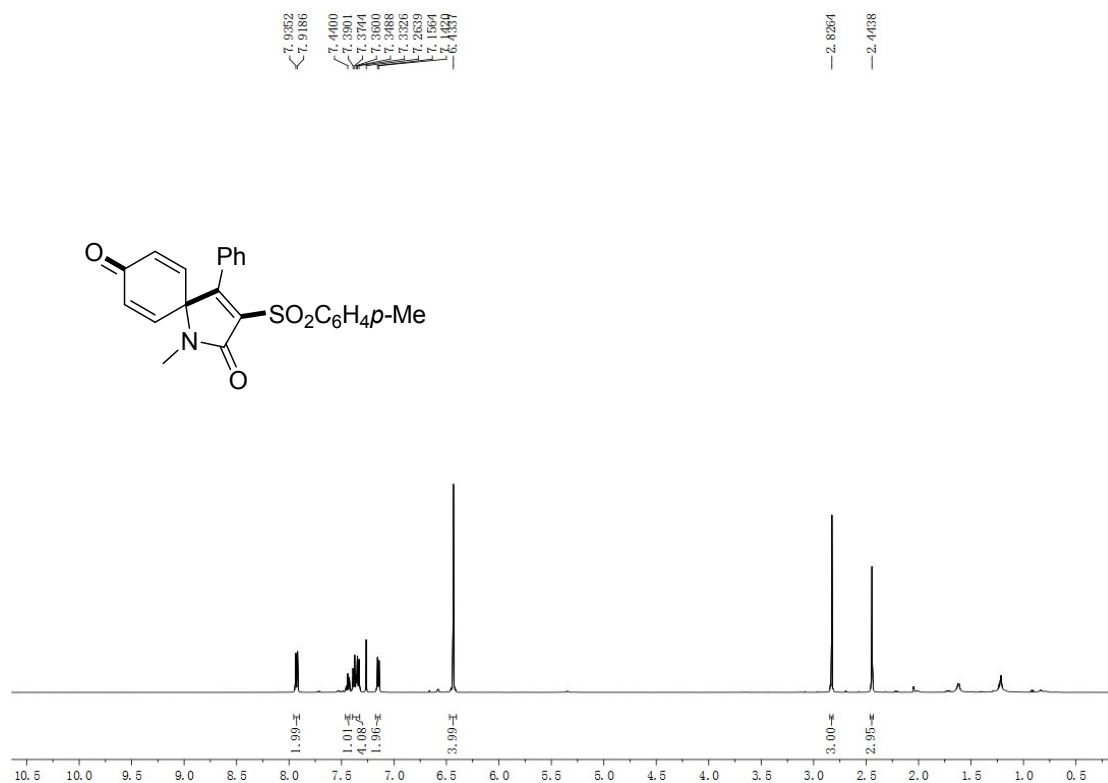

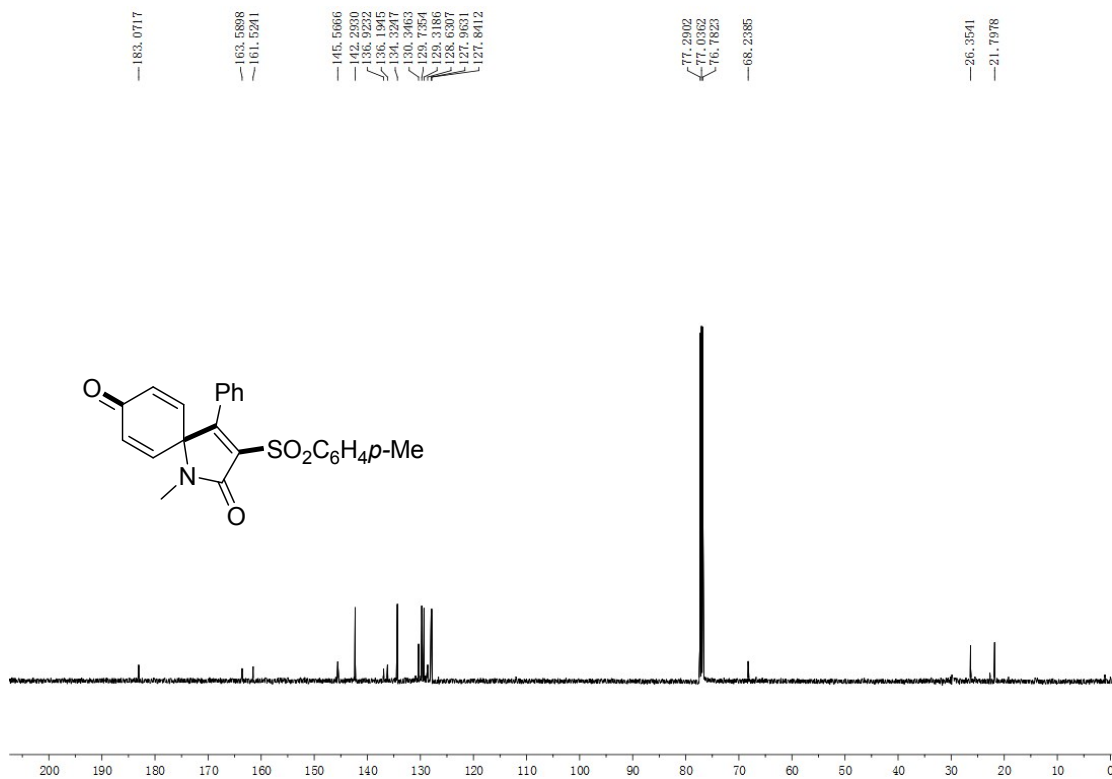

3b

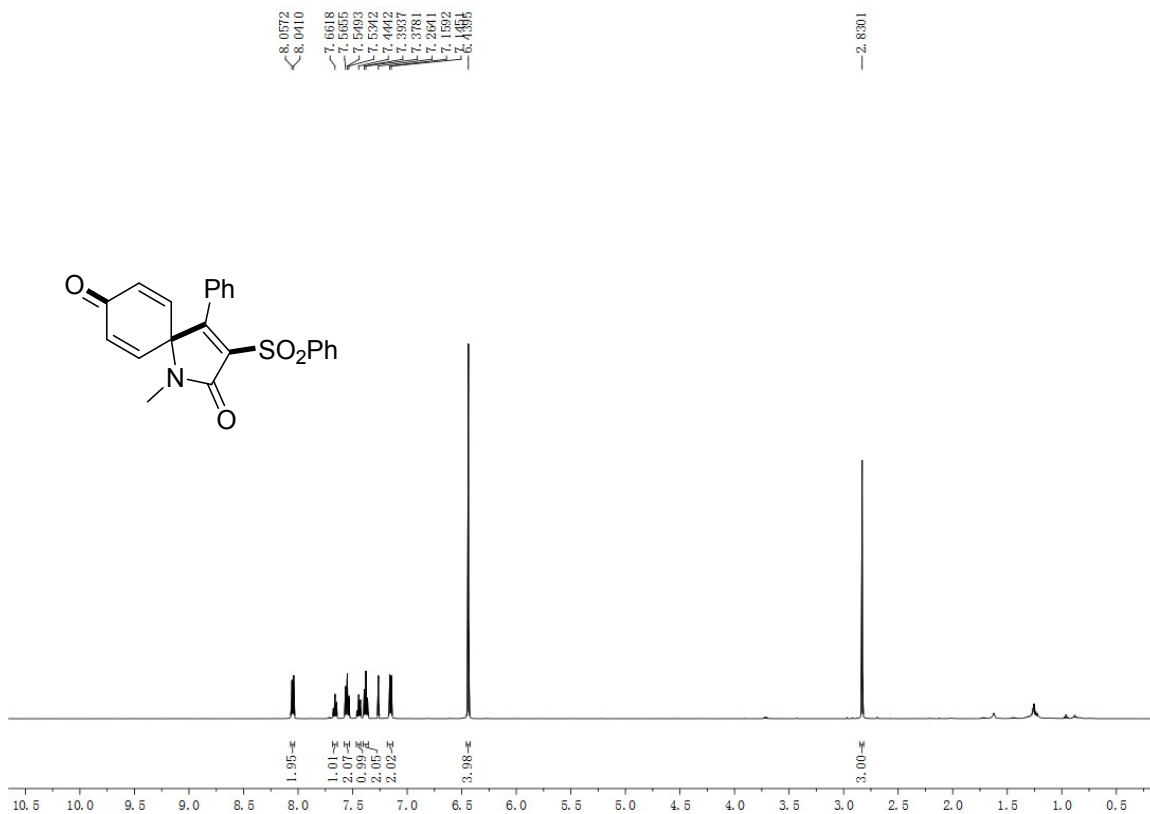

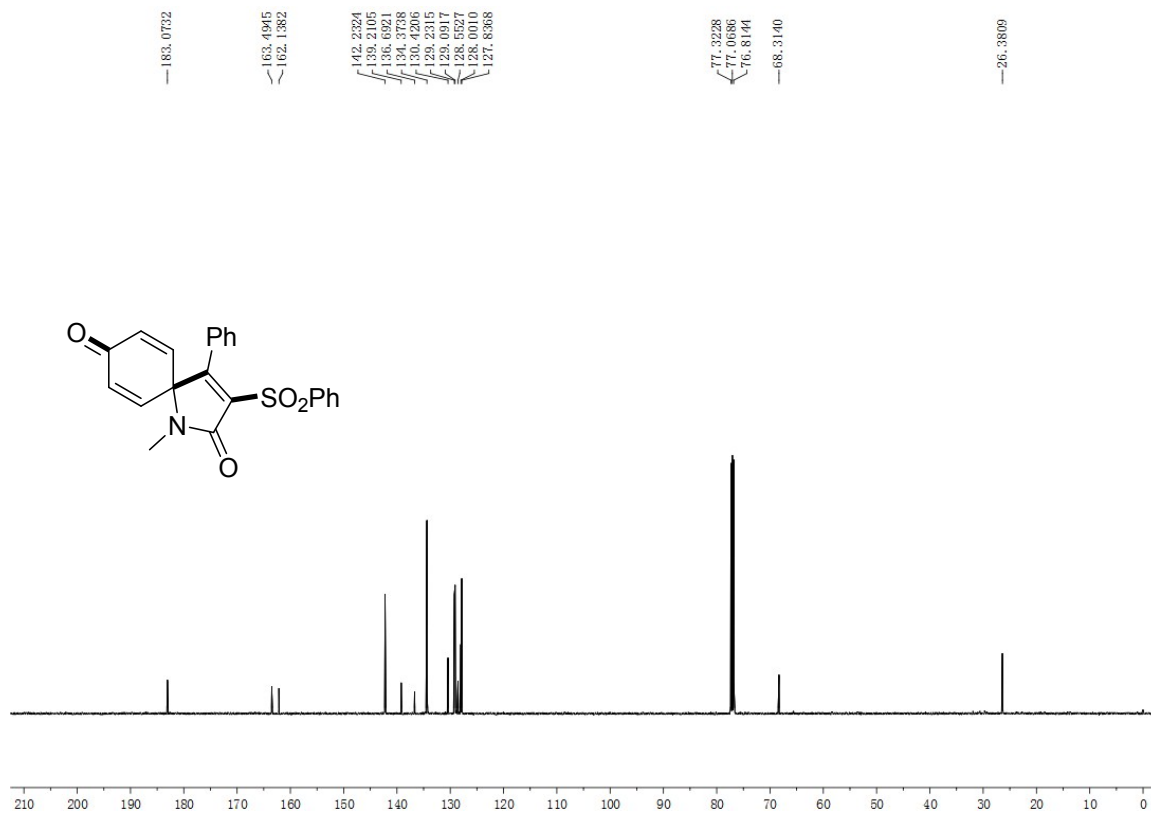

3c

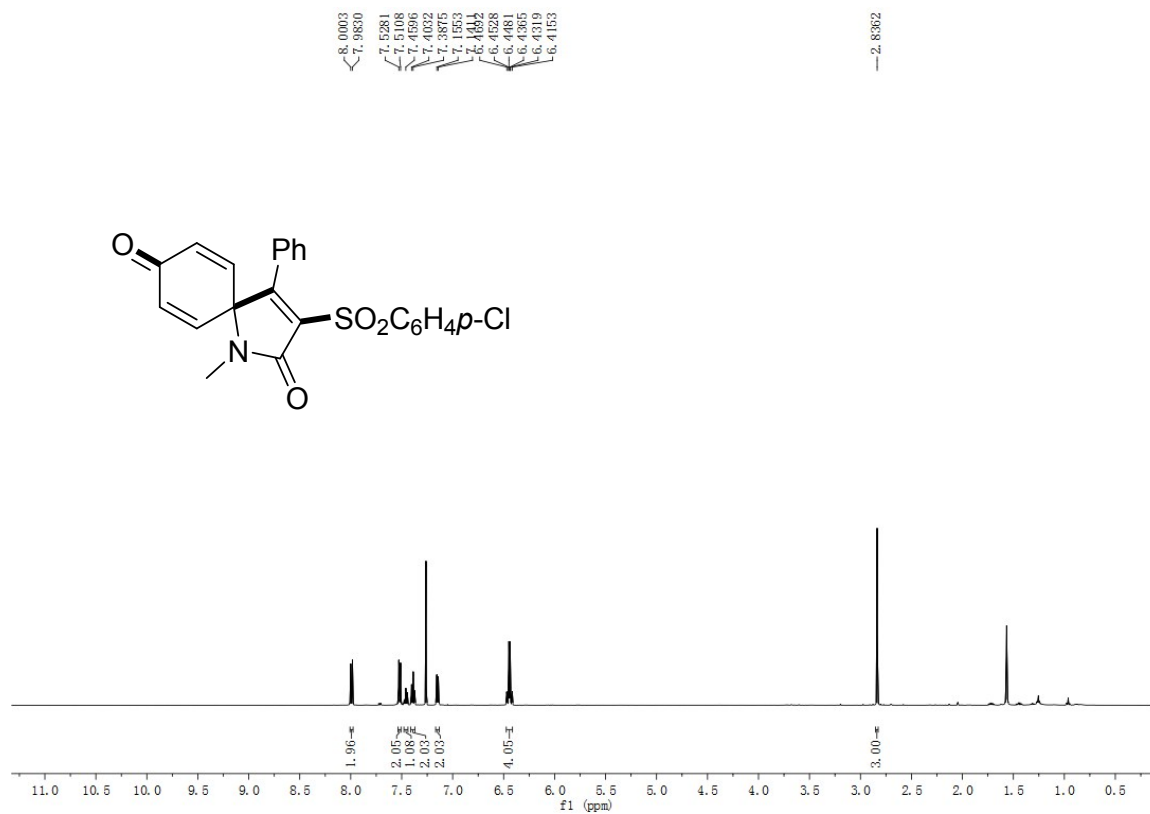

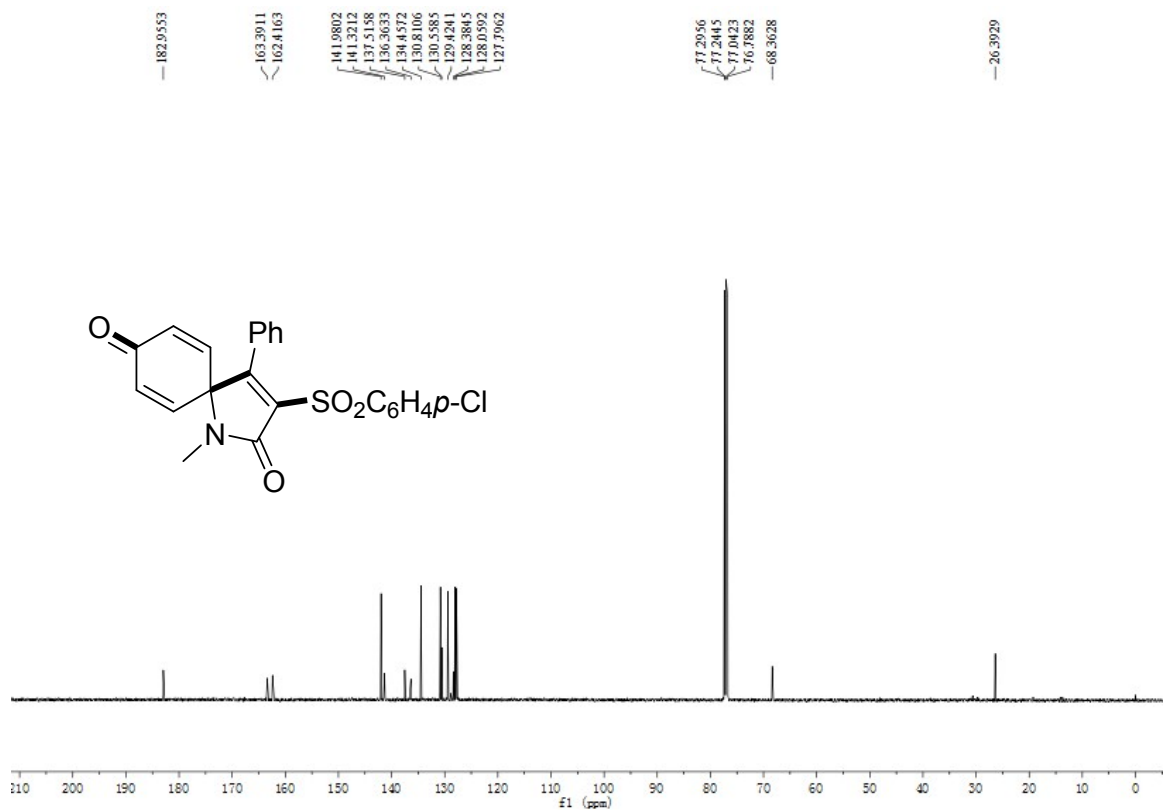

3d

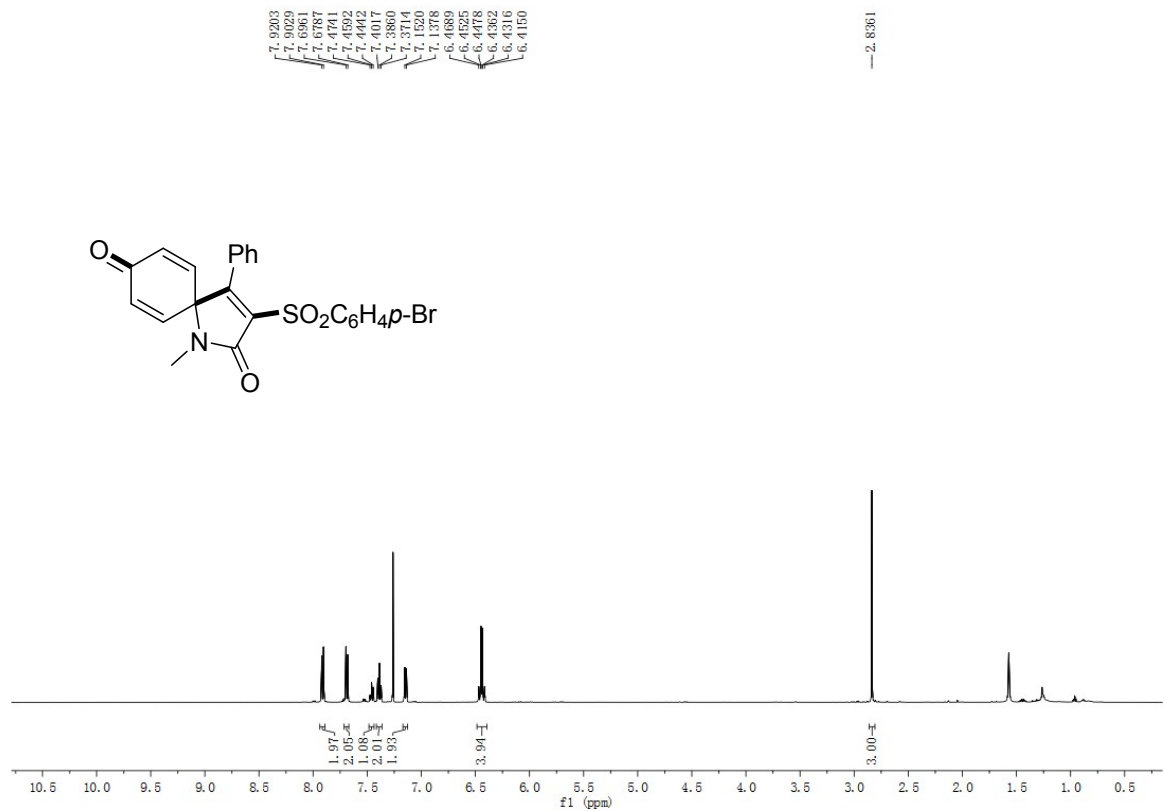

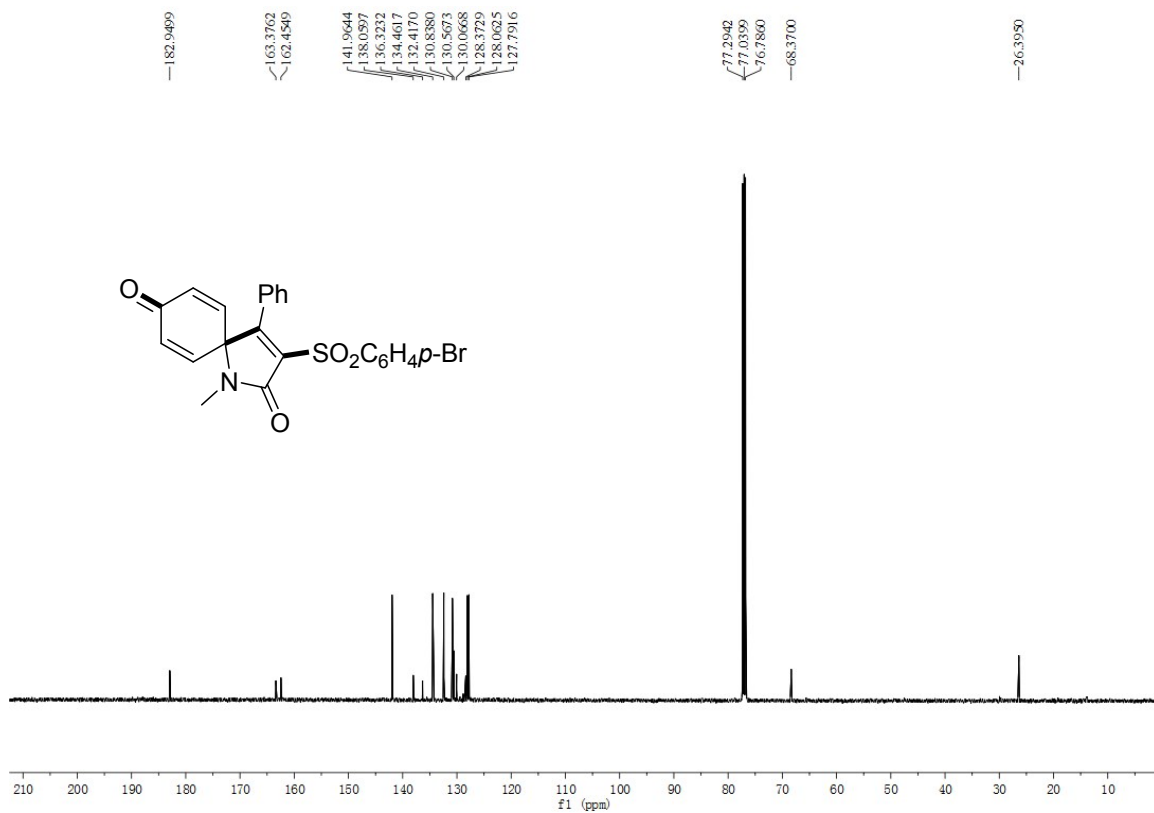

**3e**

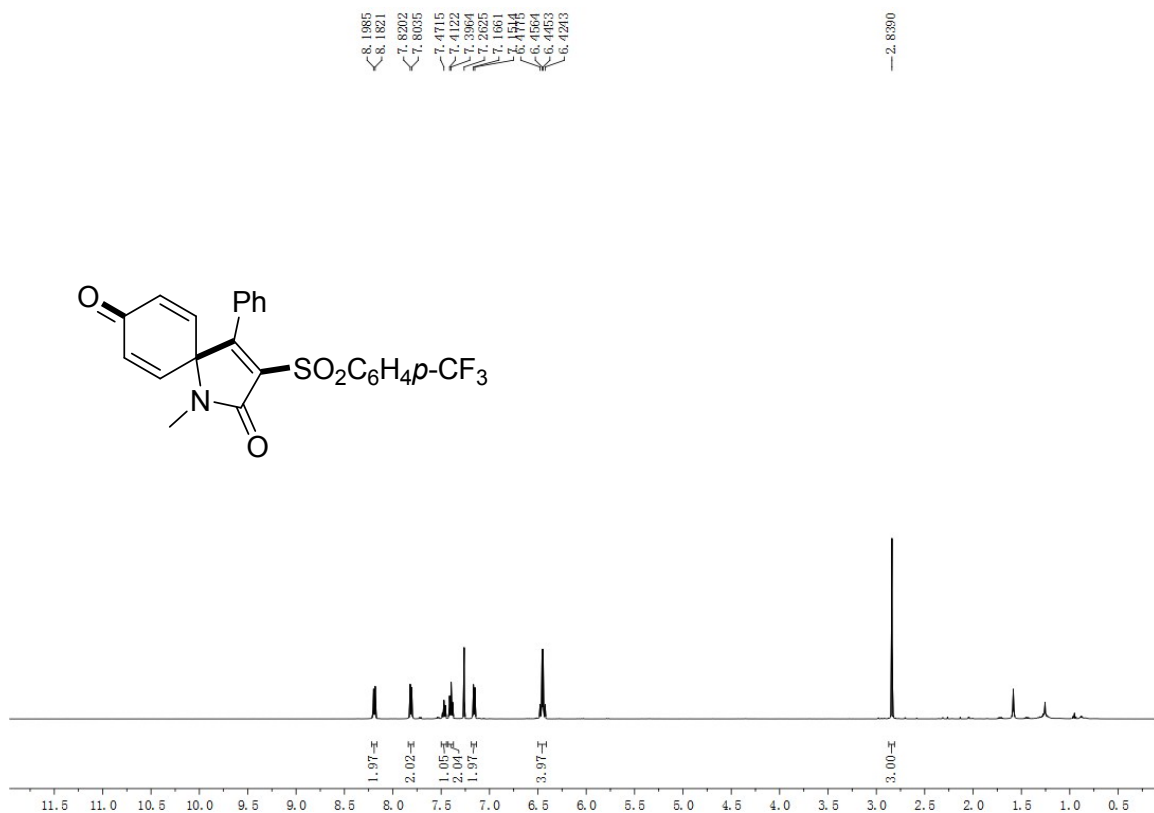

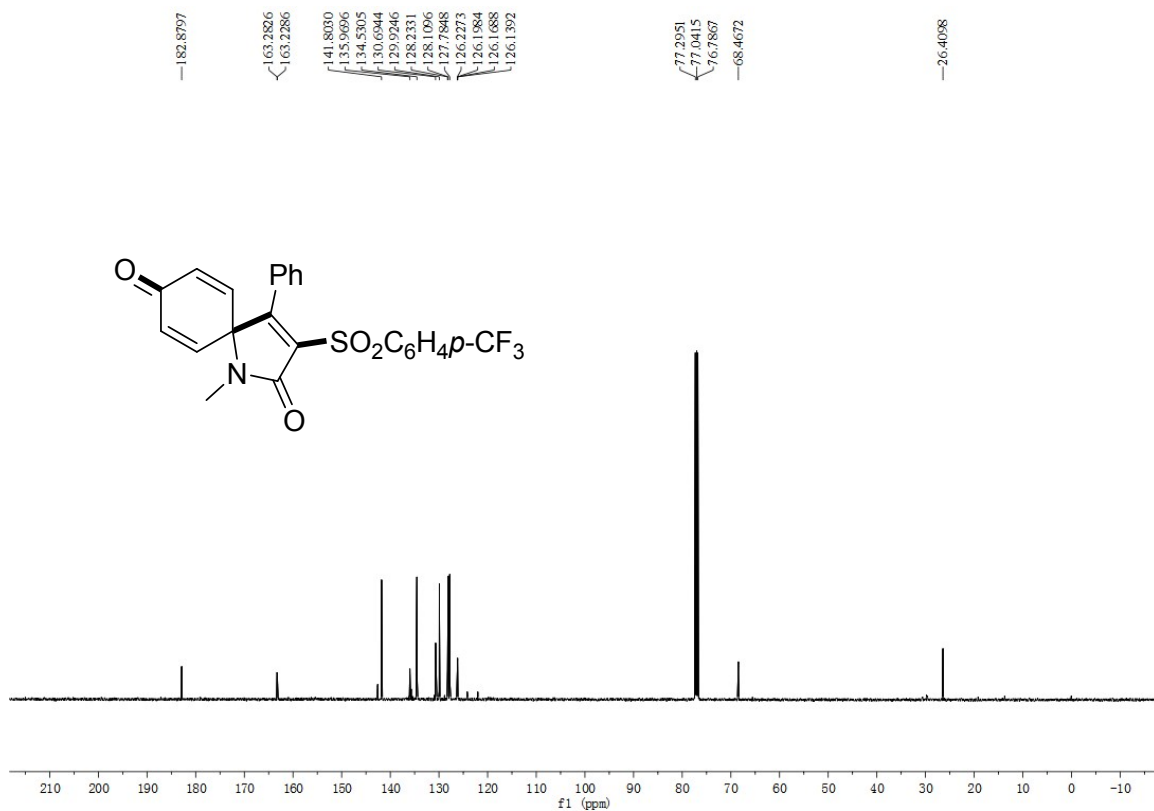

3f

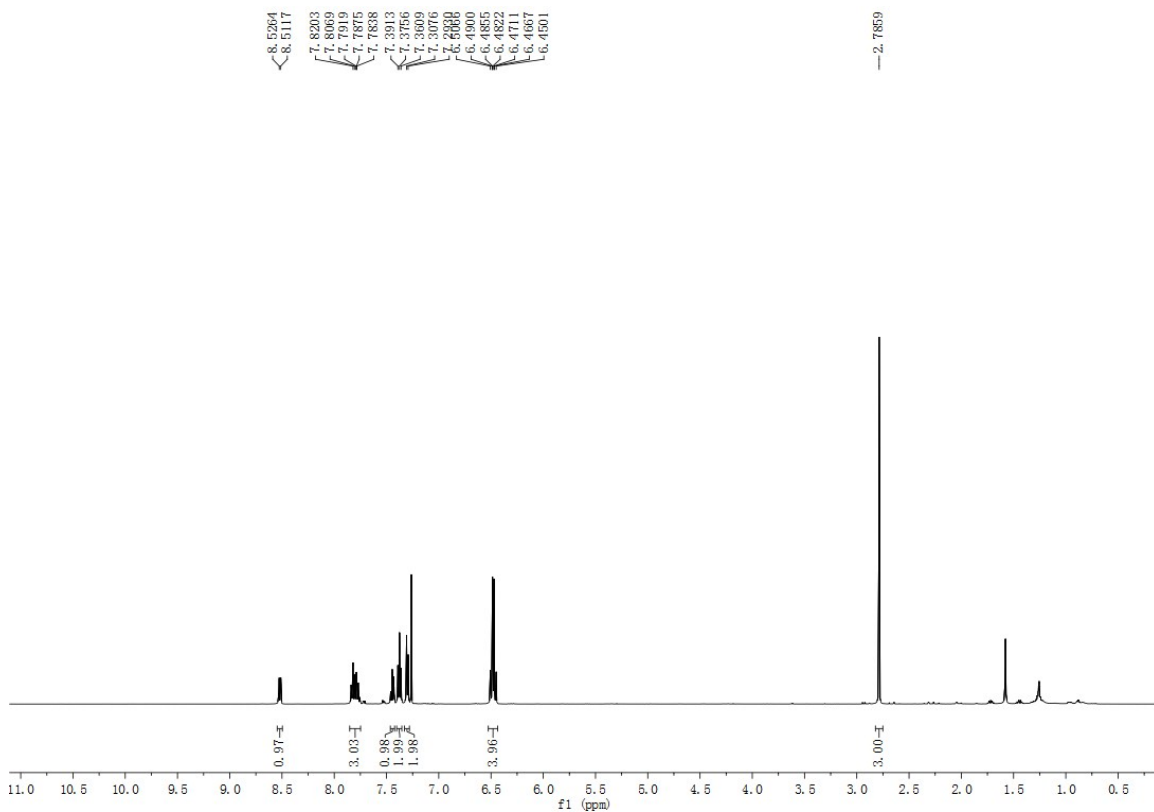

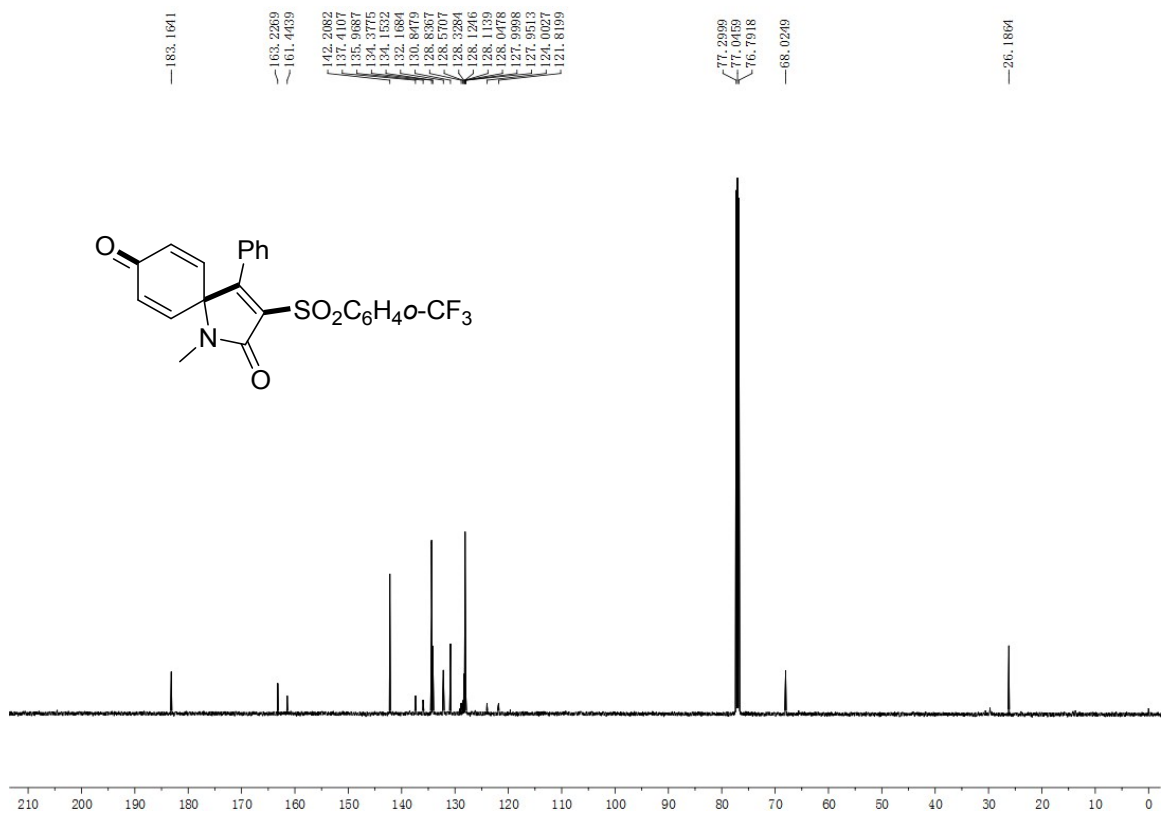

3g

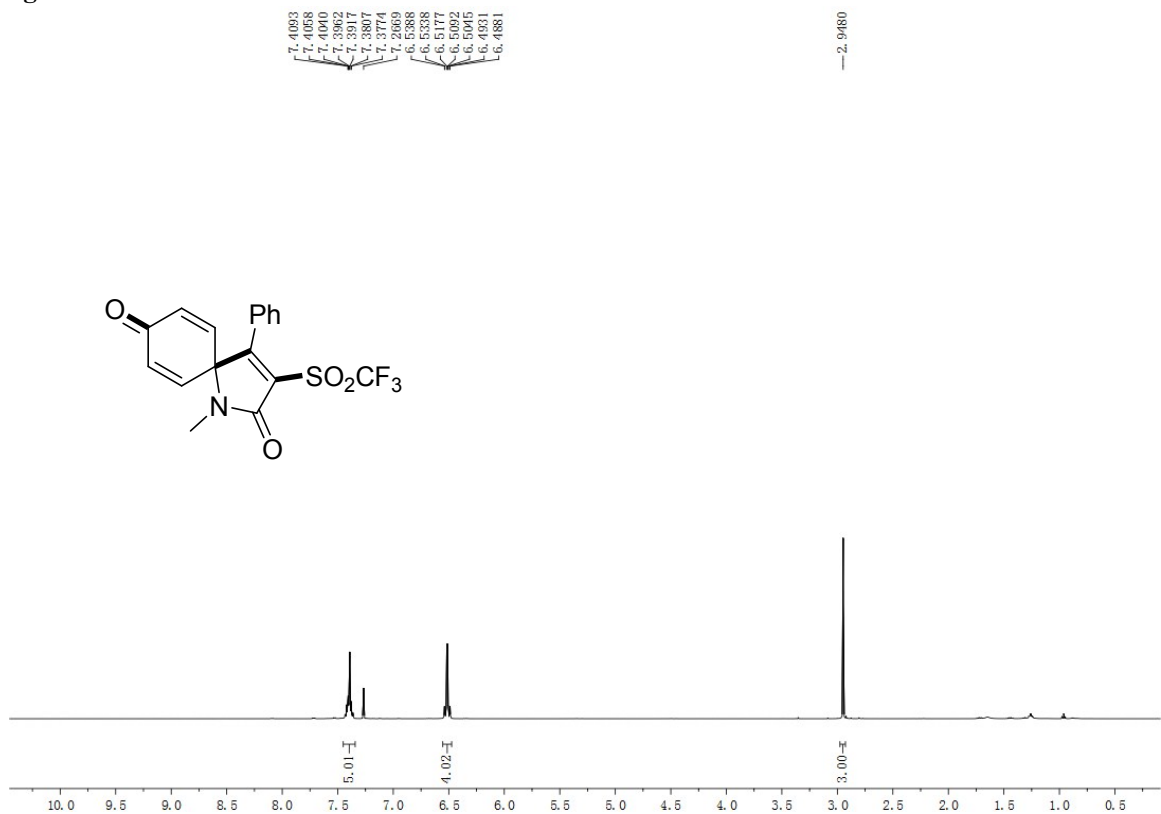

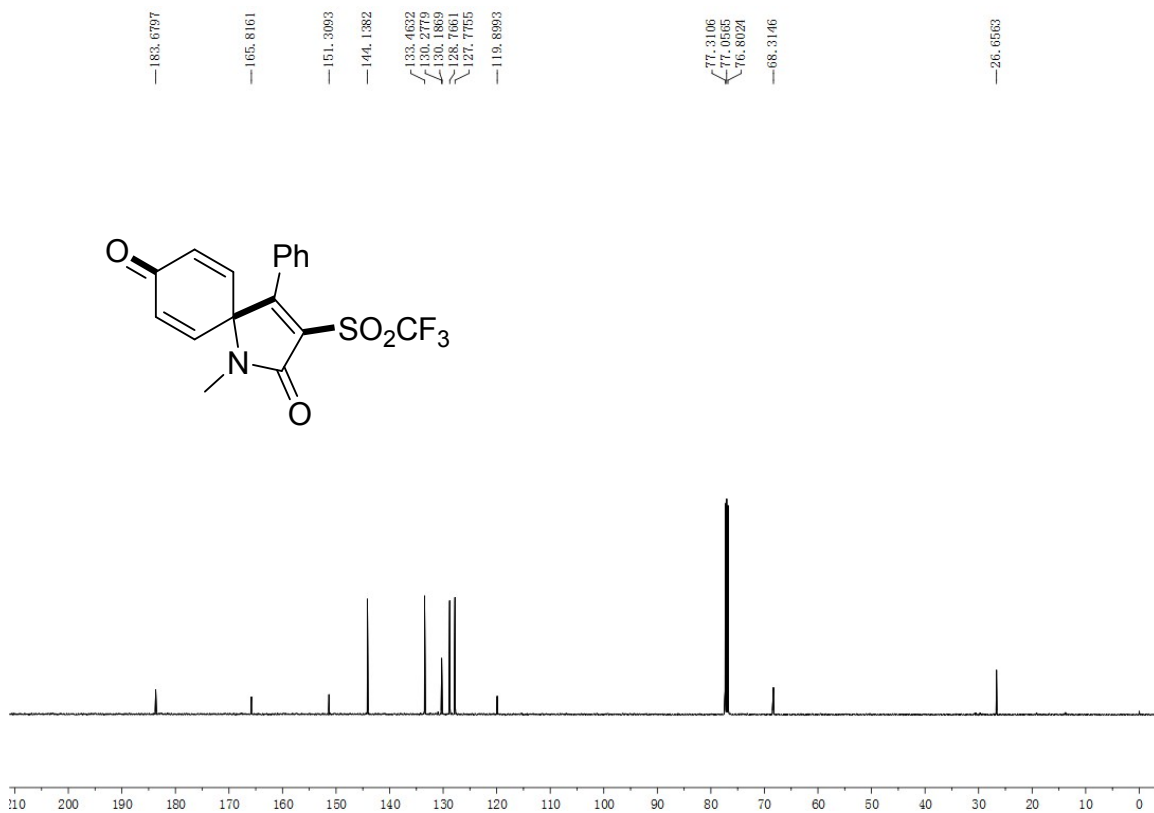

**3h**

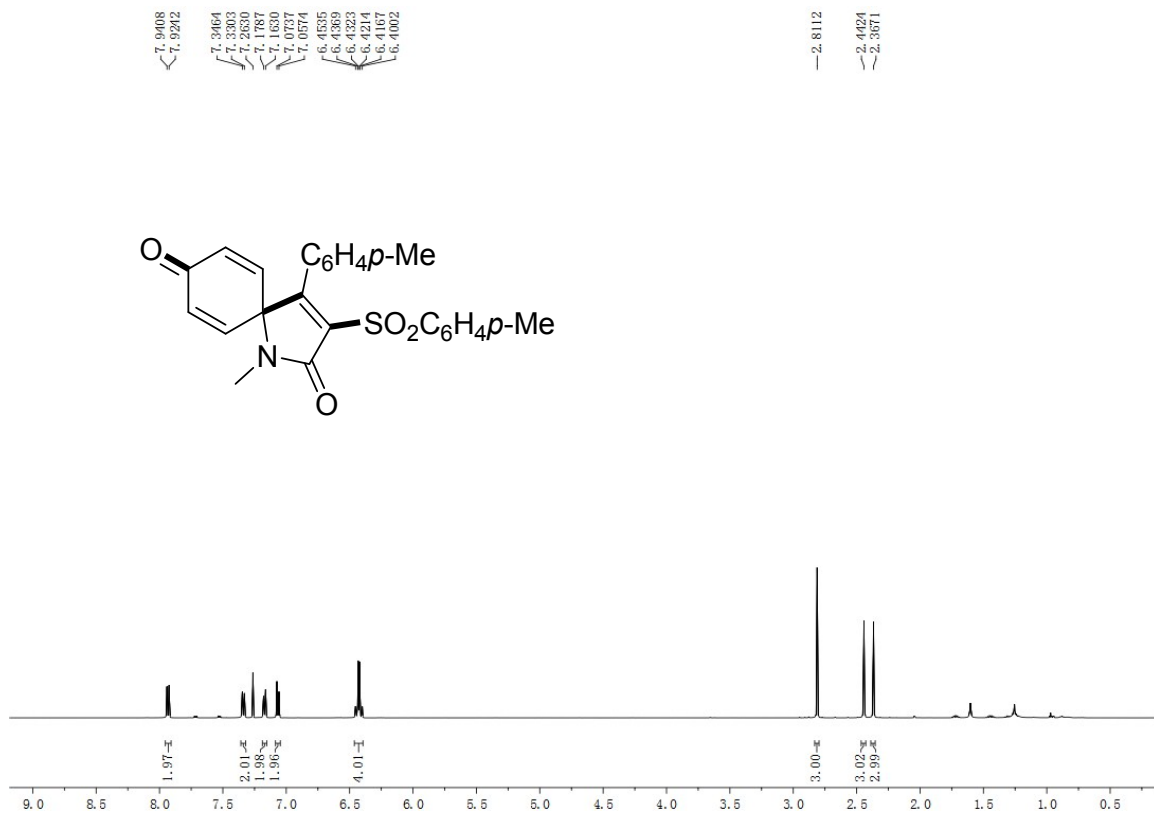

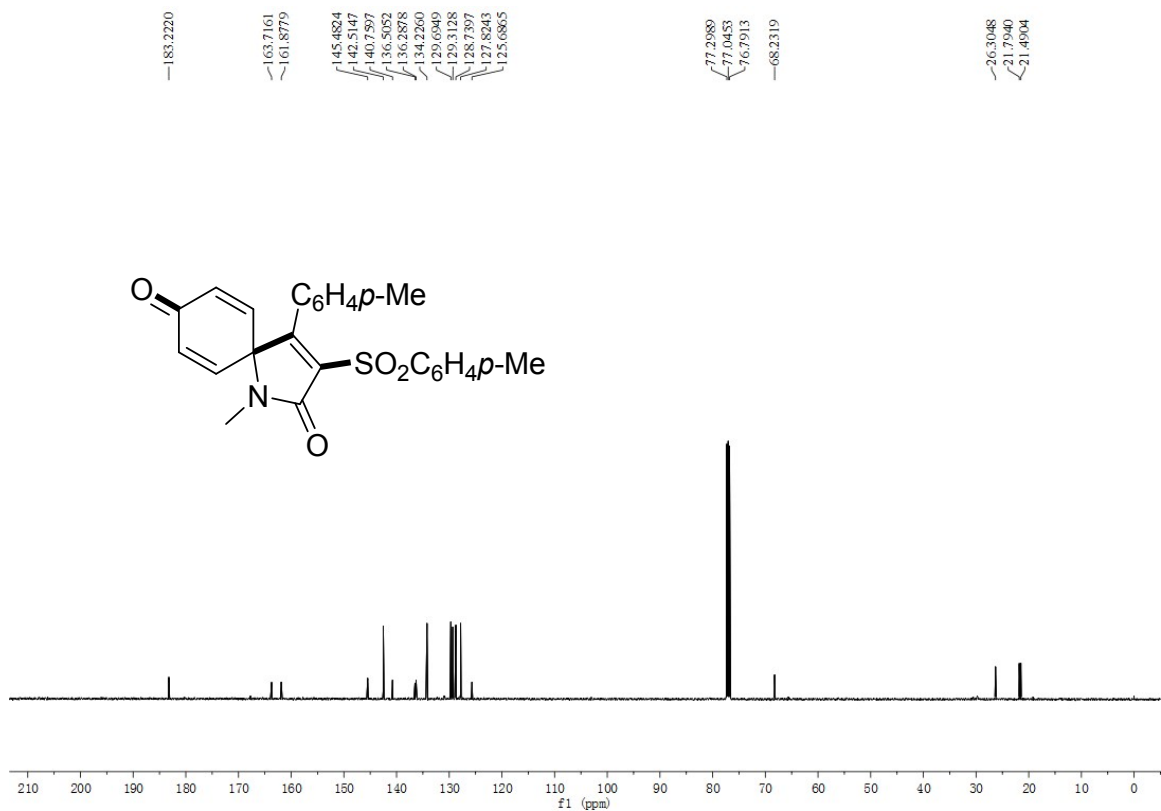

**3i**

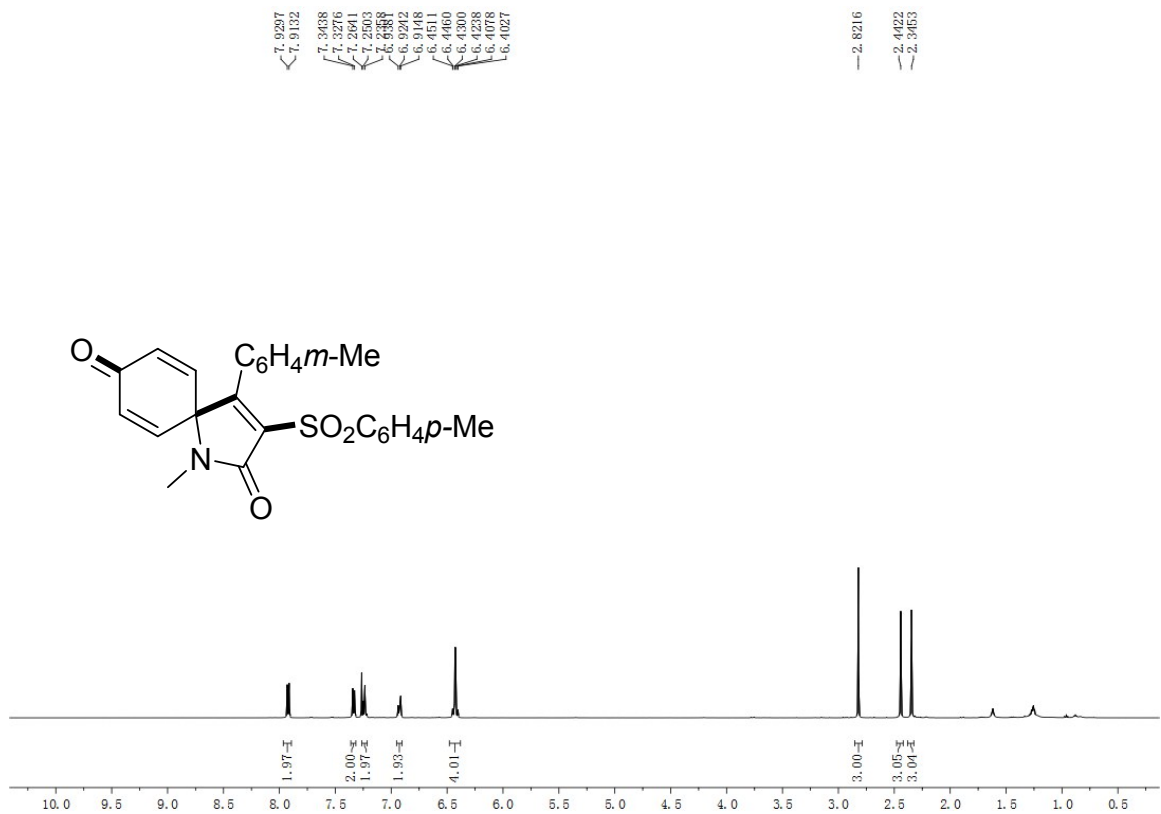

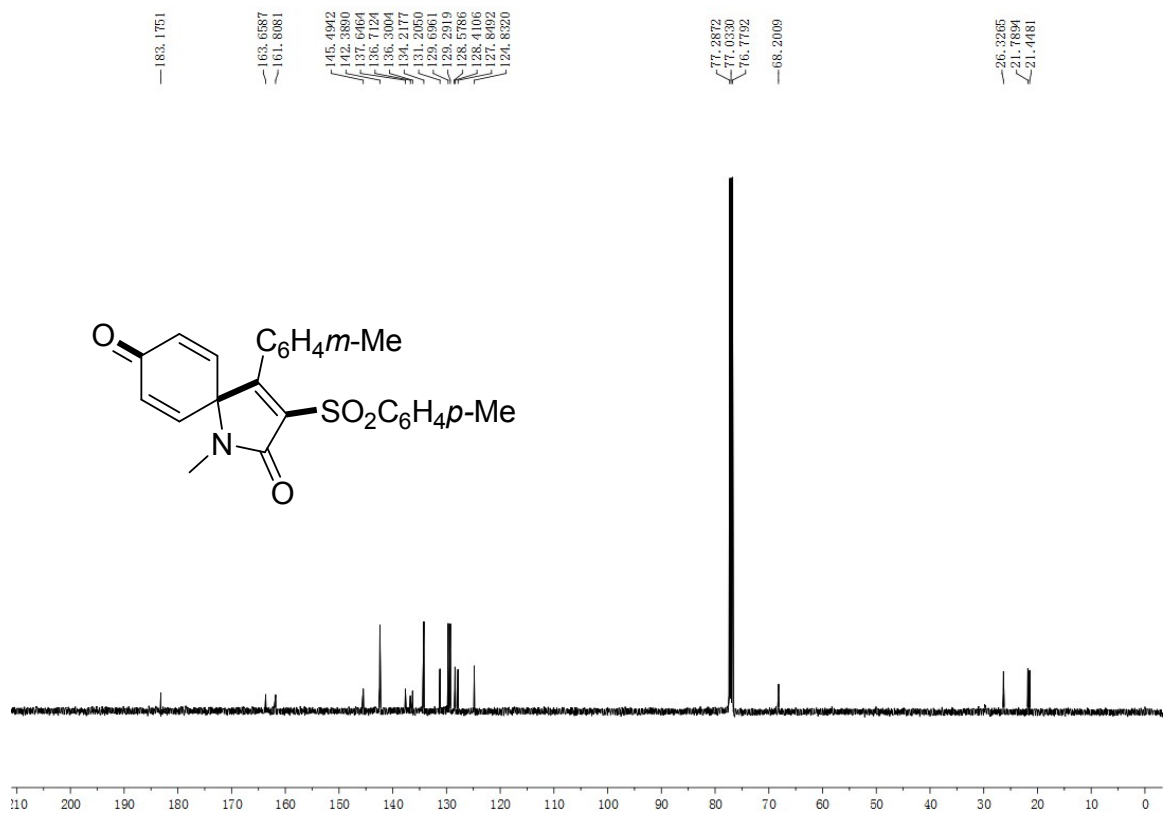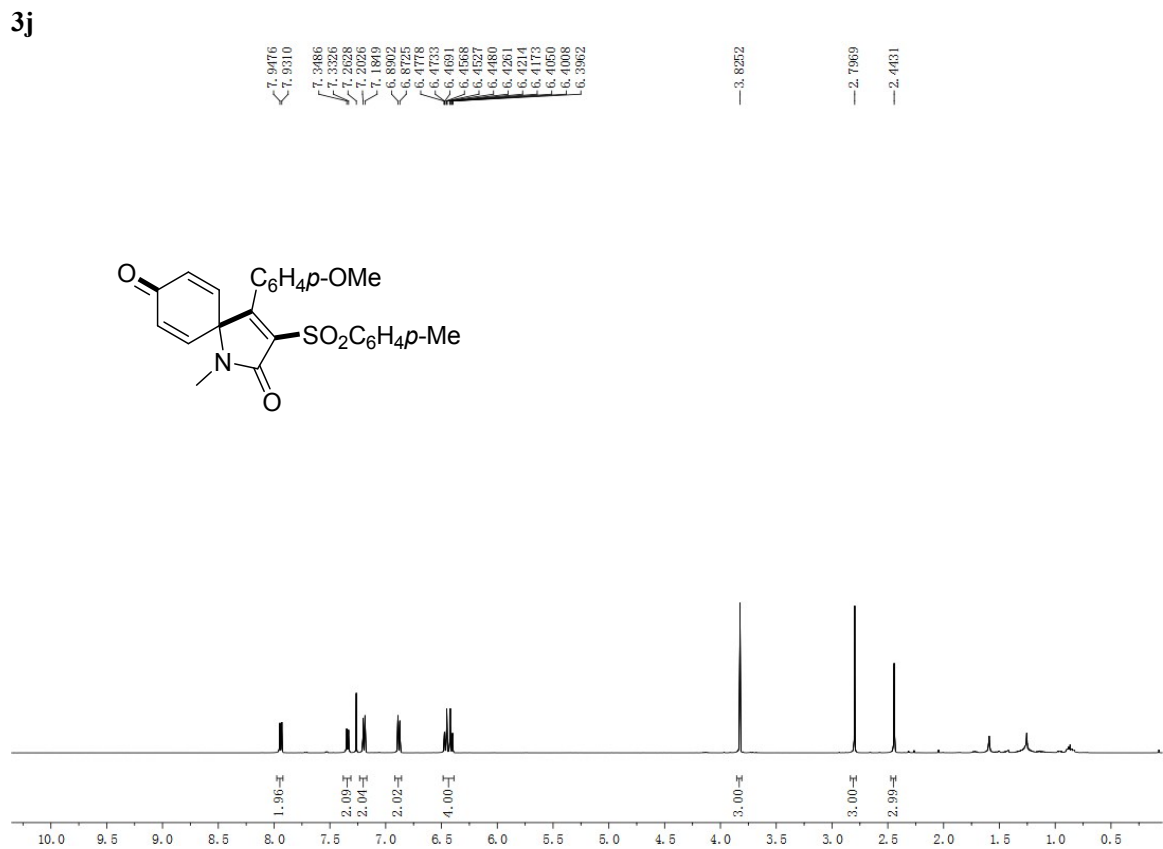

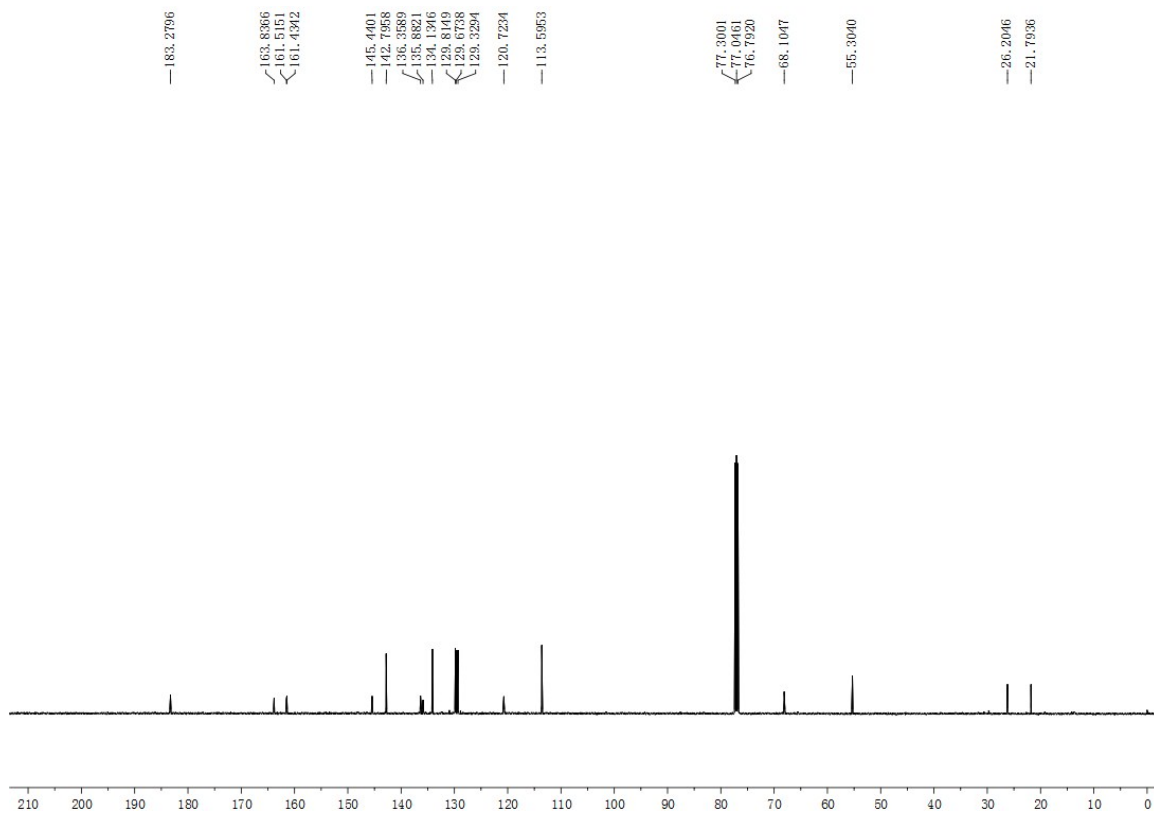

3k

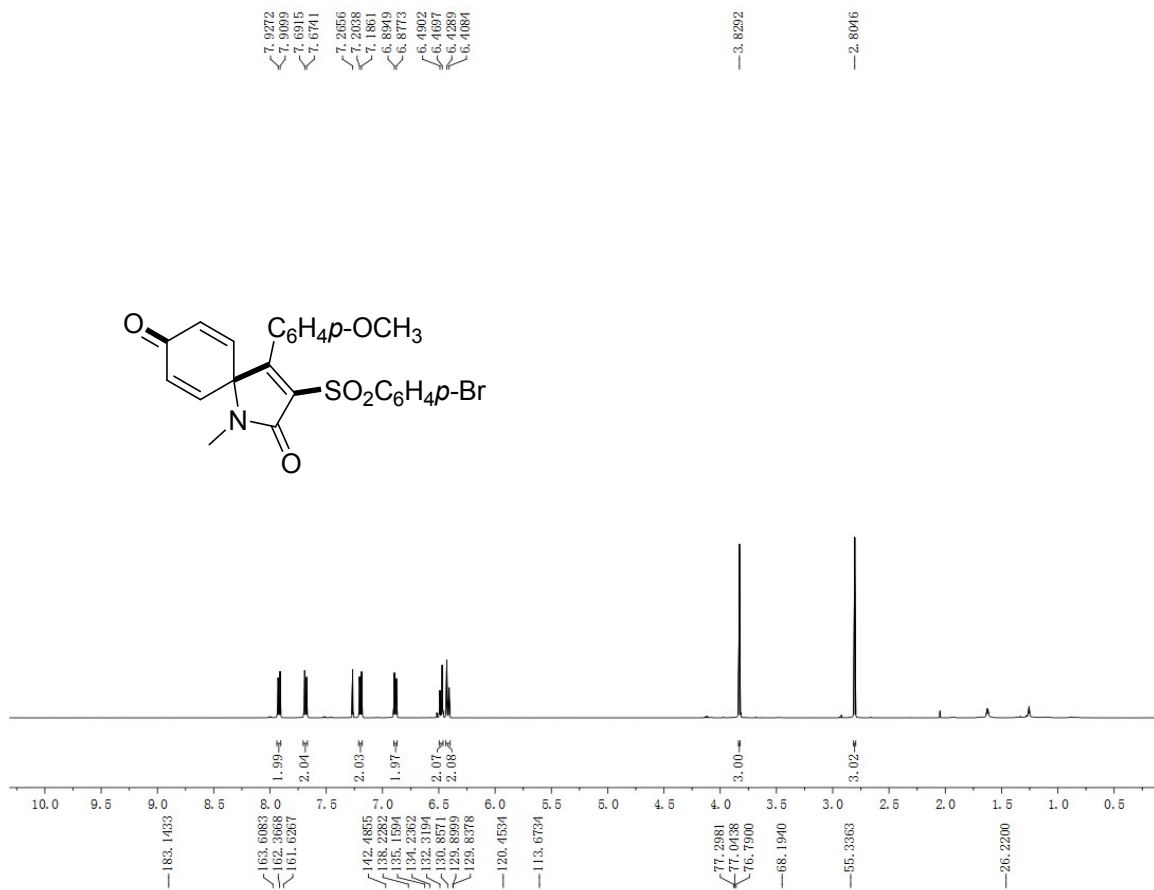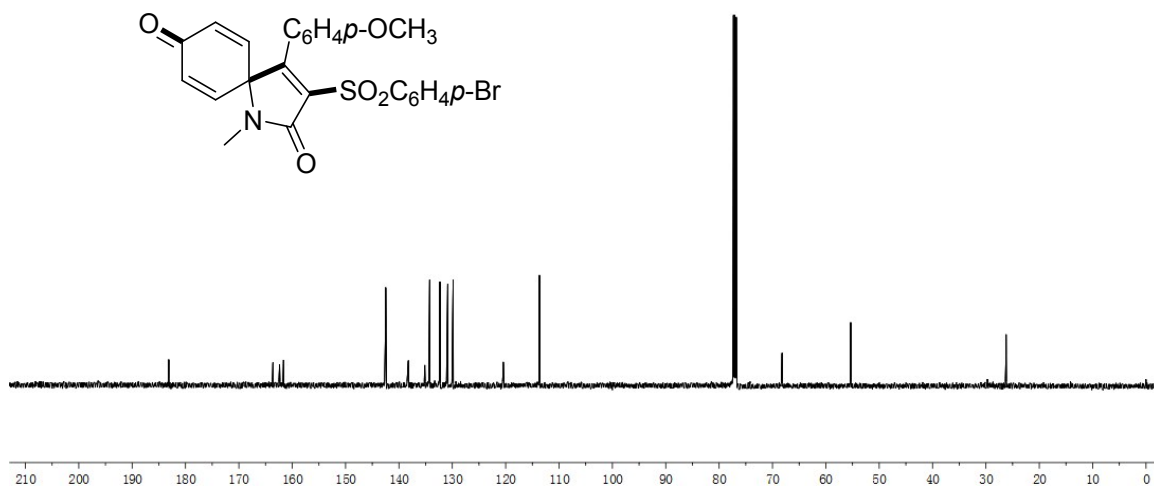



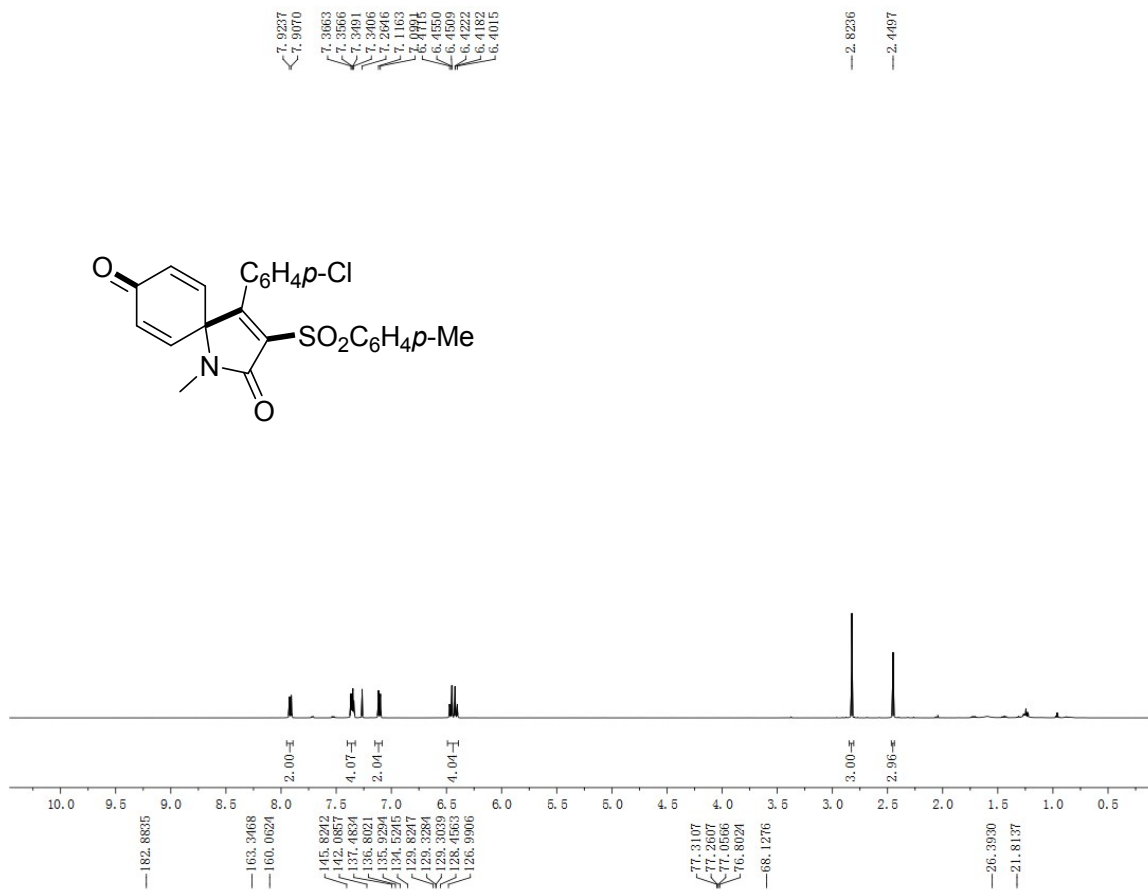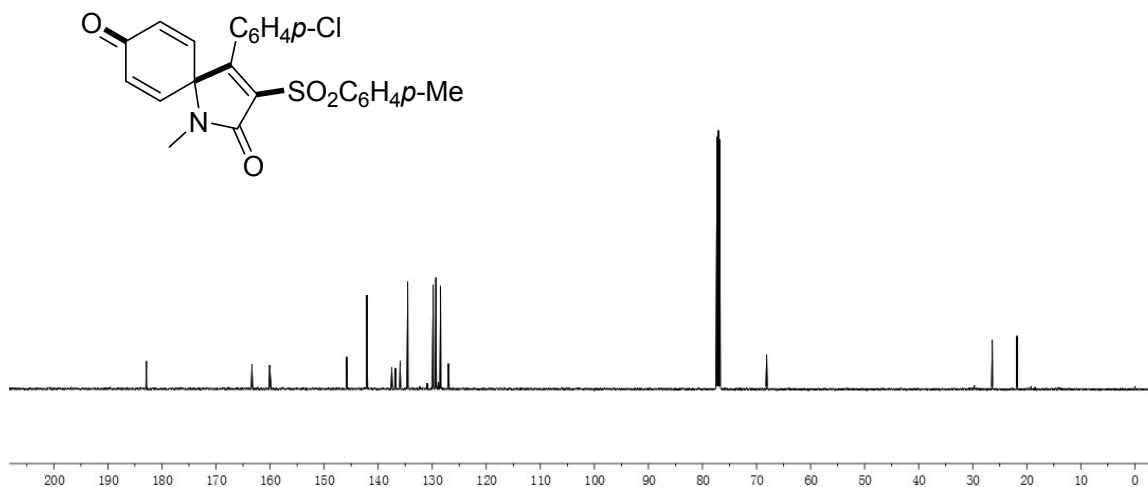

**3n**

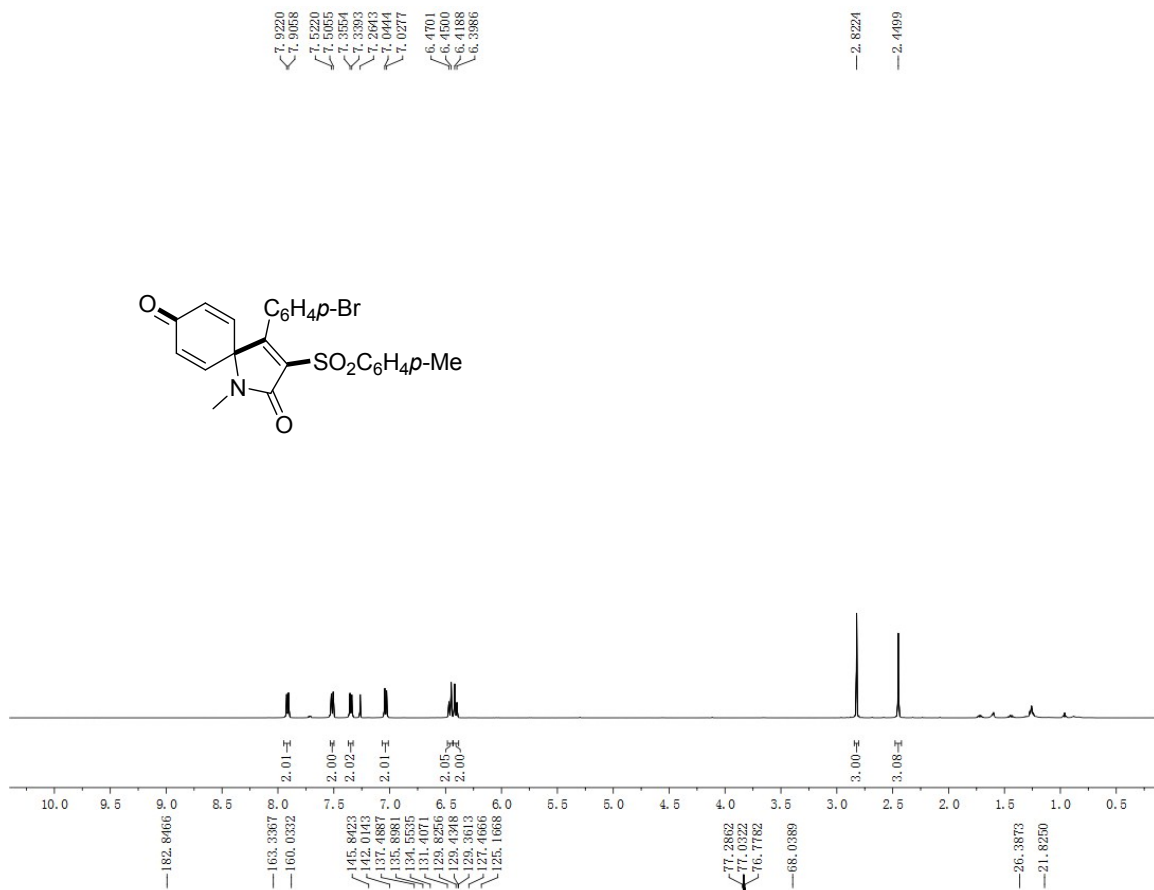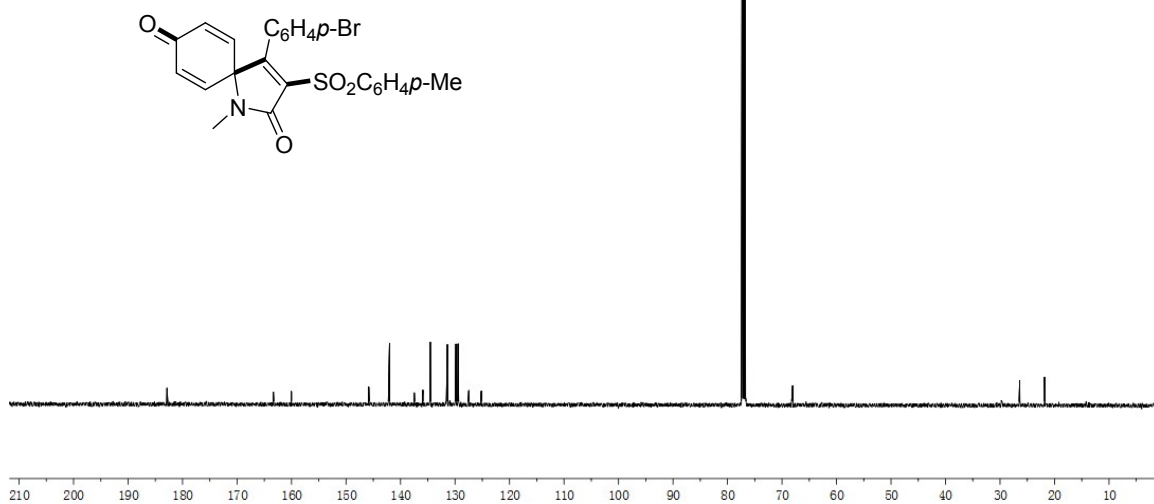

**3o**

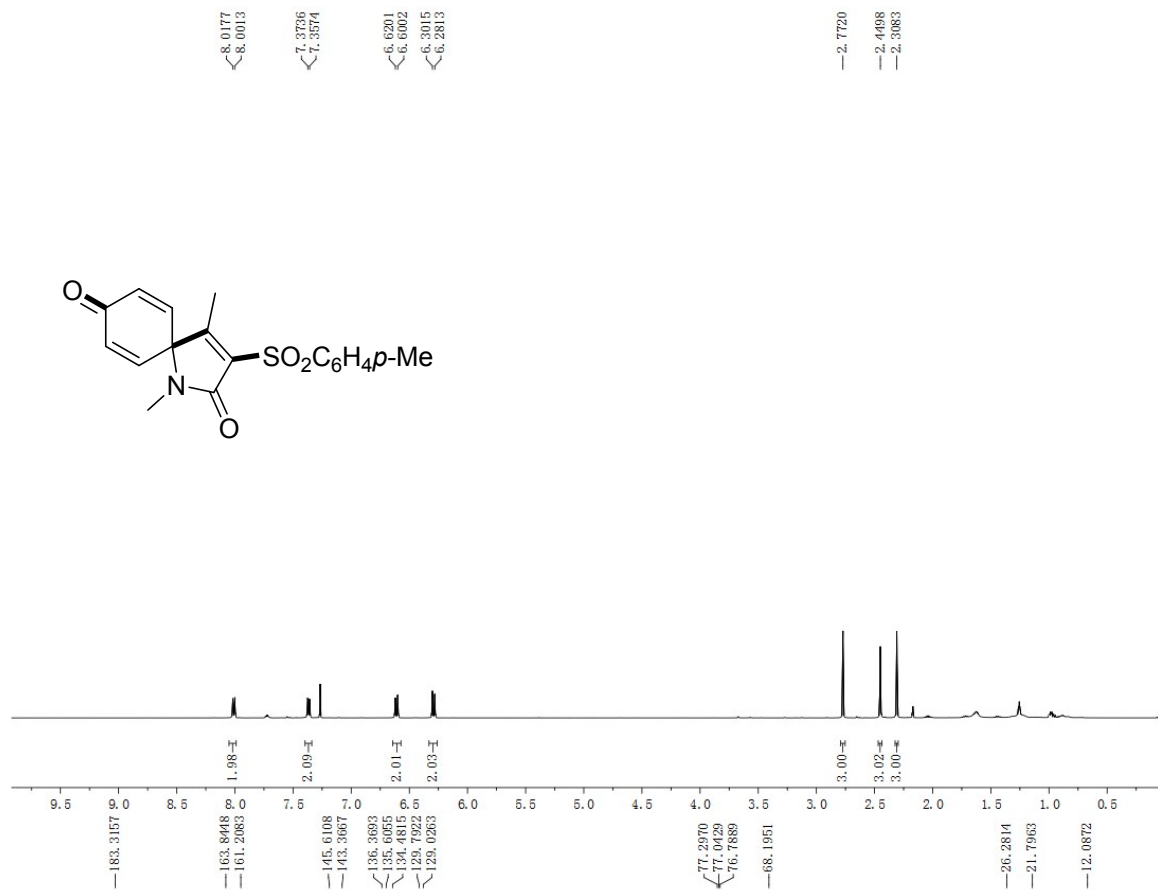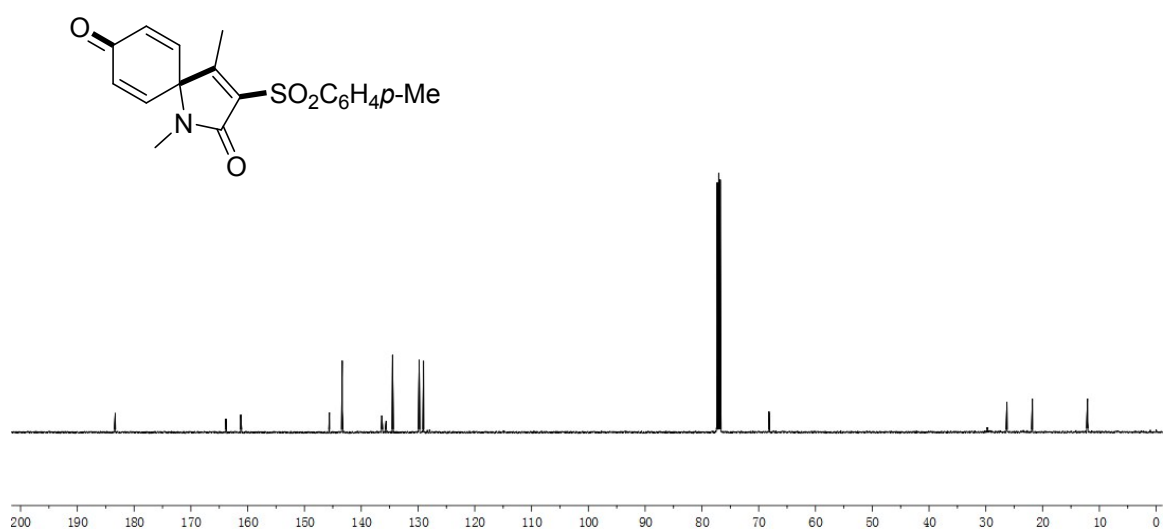

3p

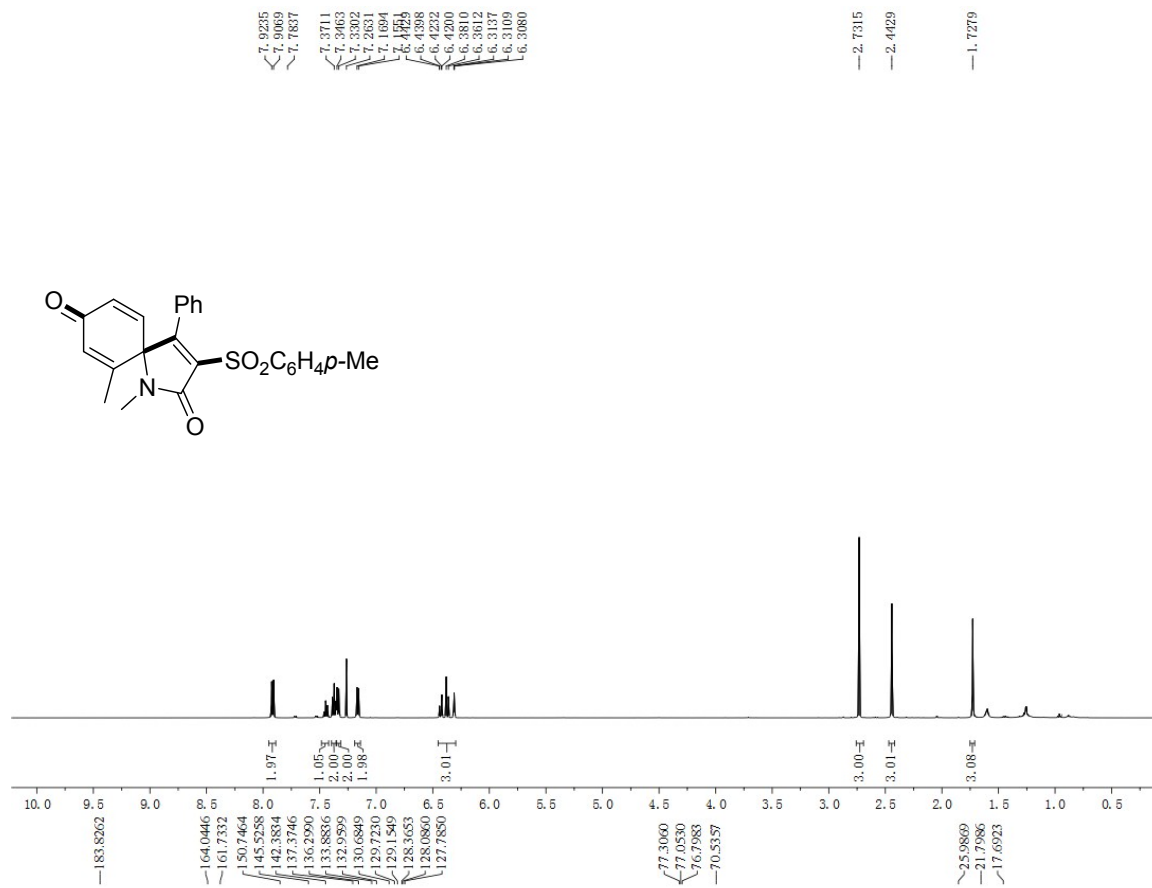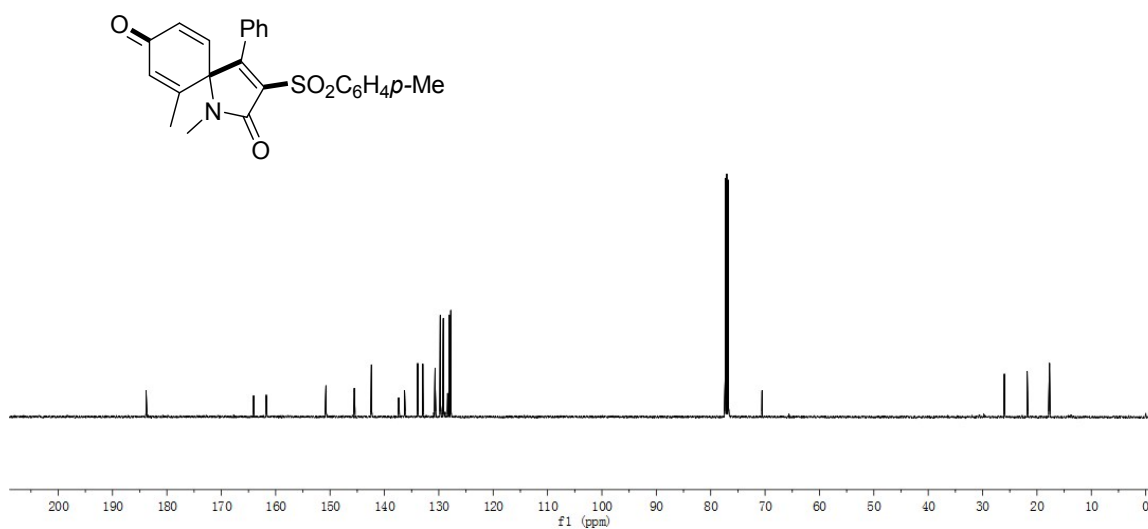

3q

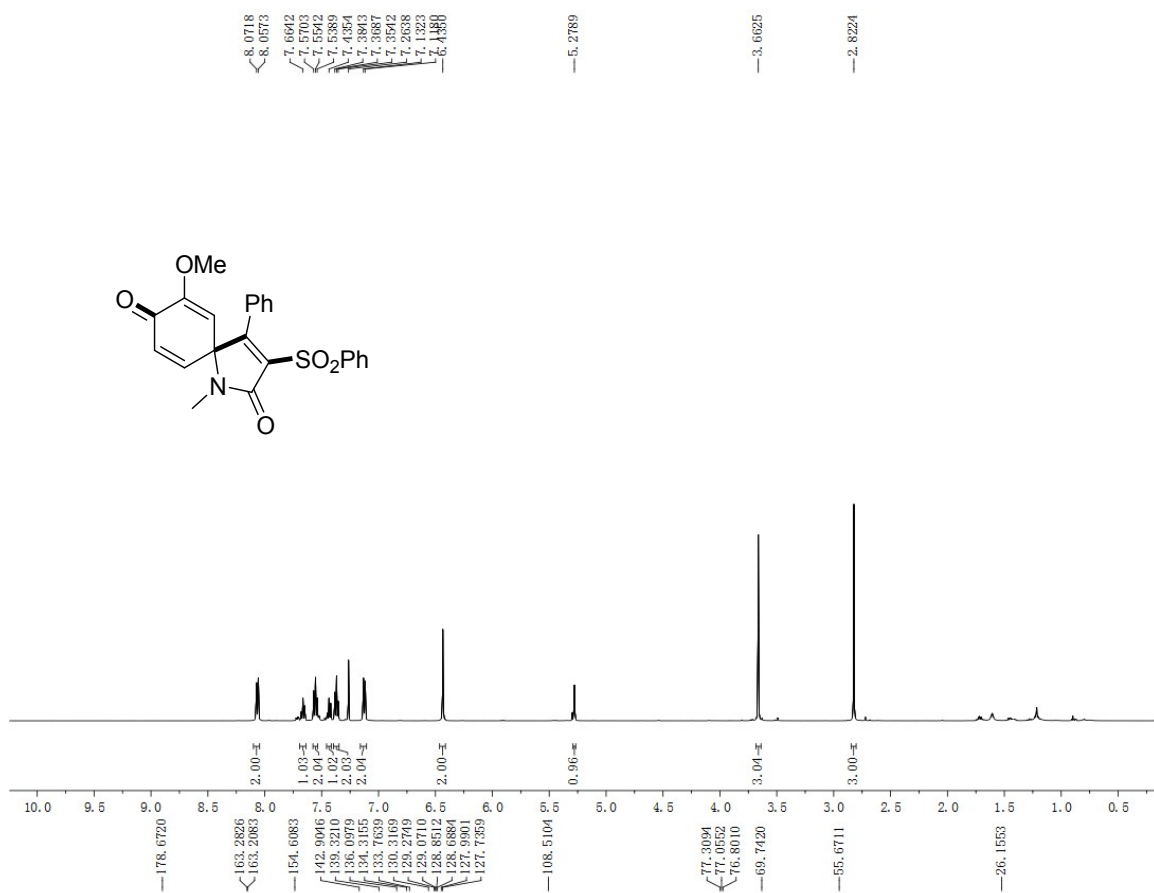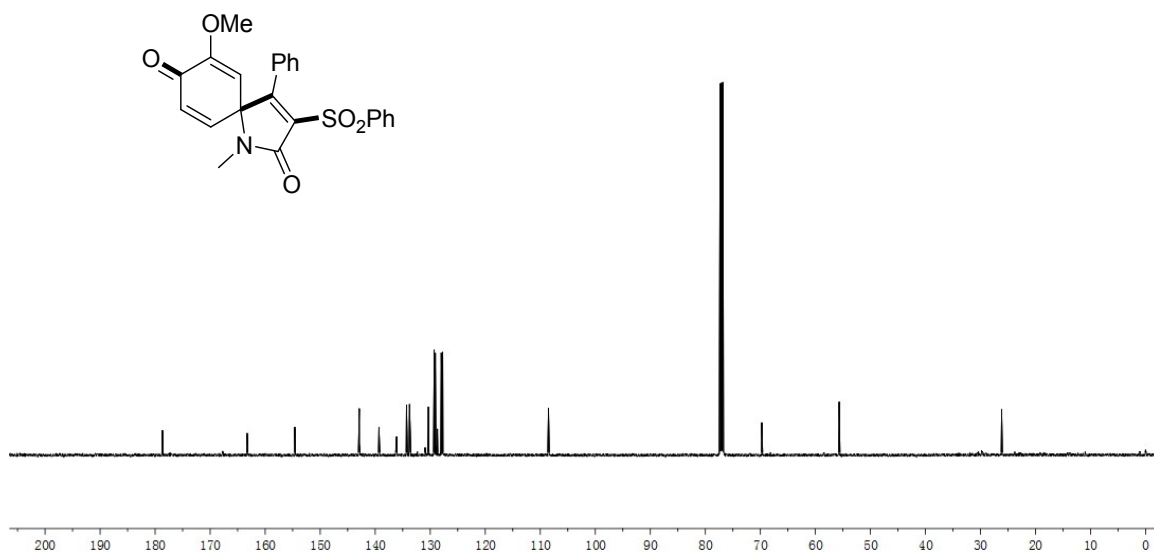

3r

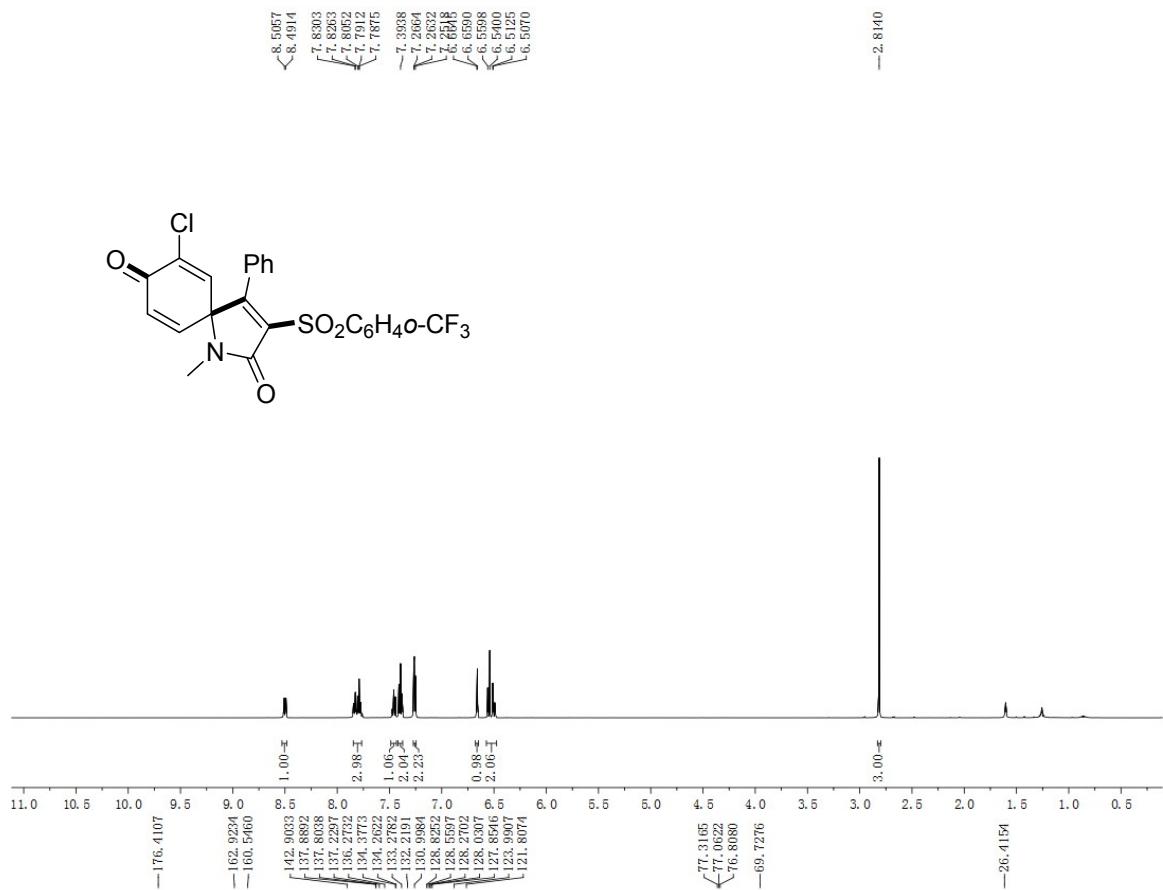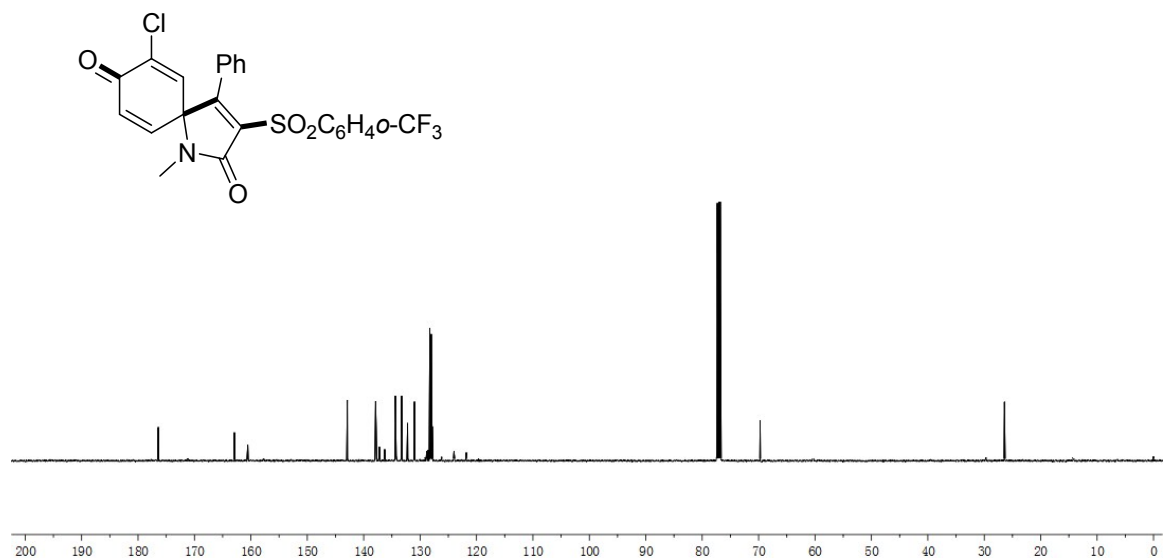

3s

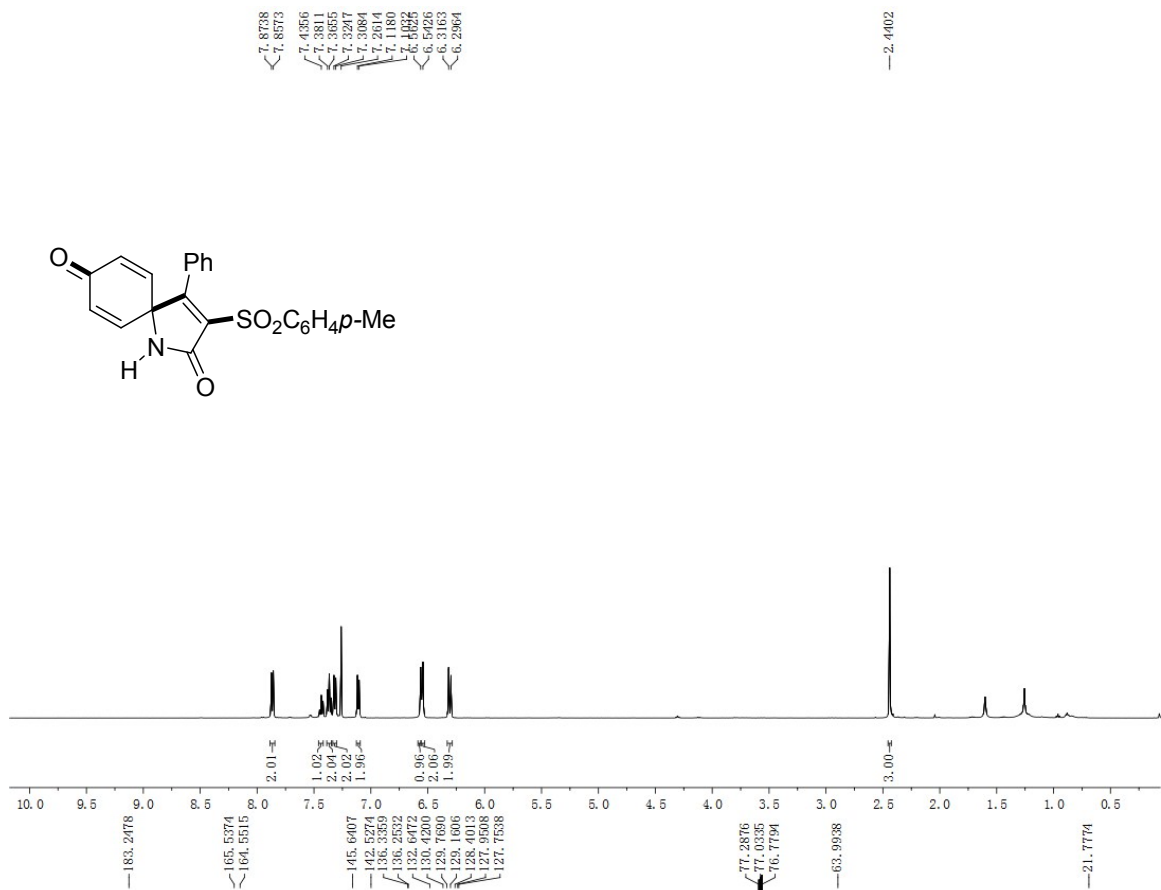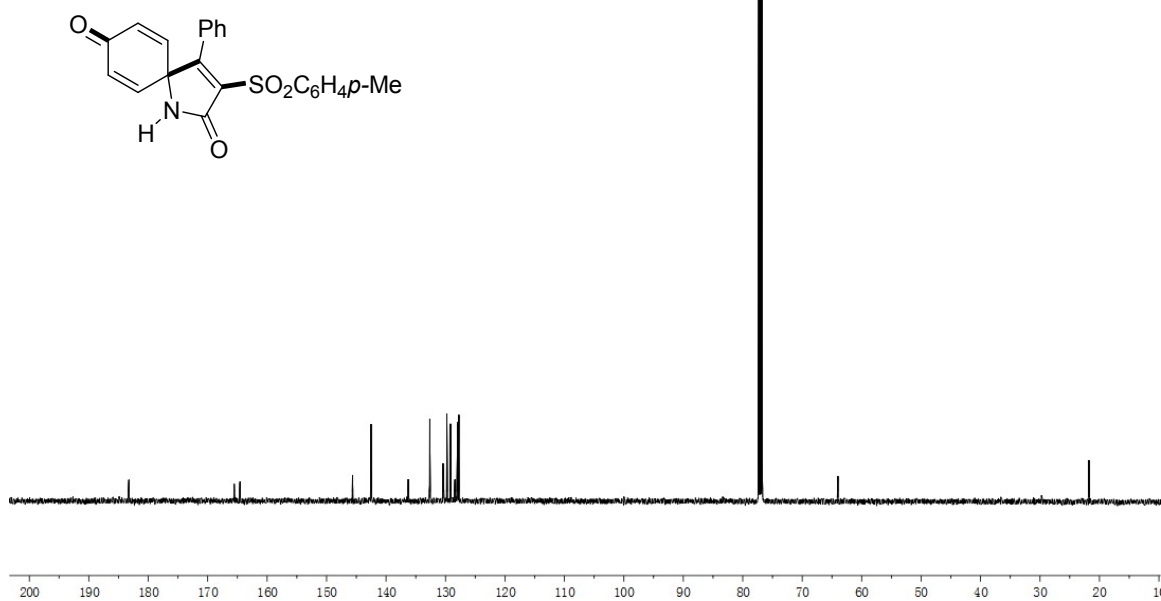

5a

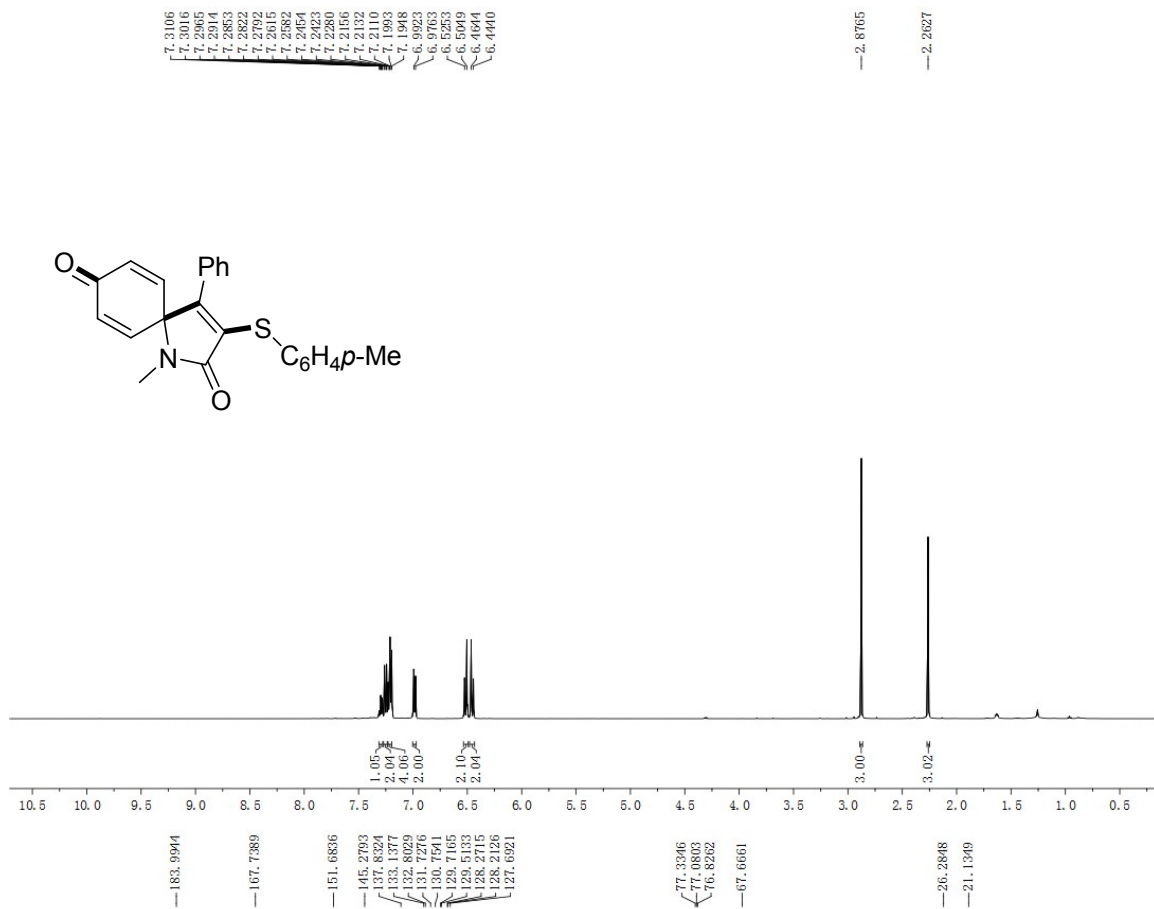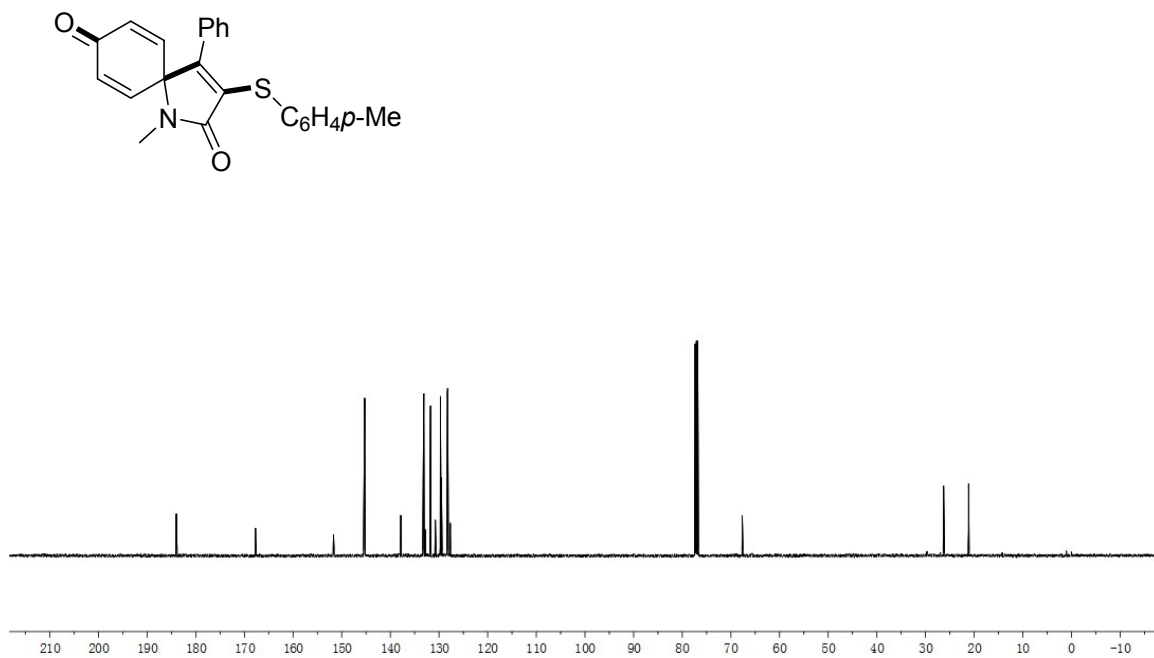

5b

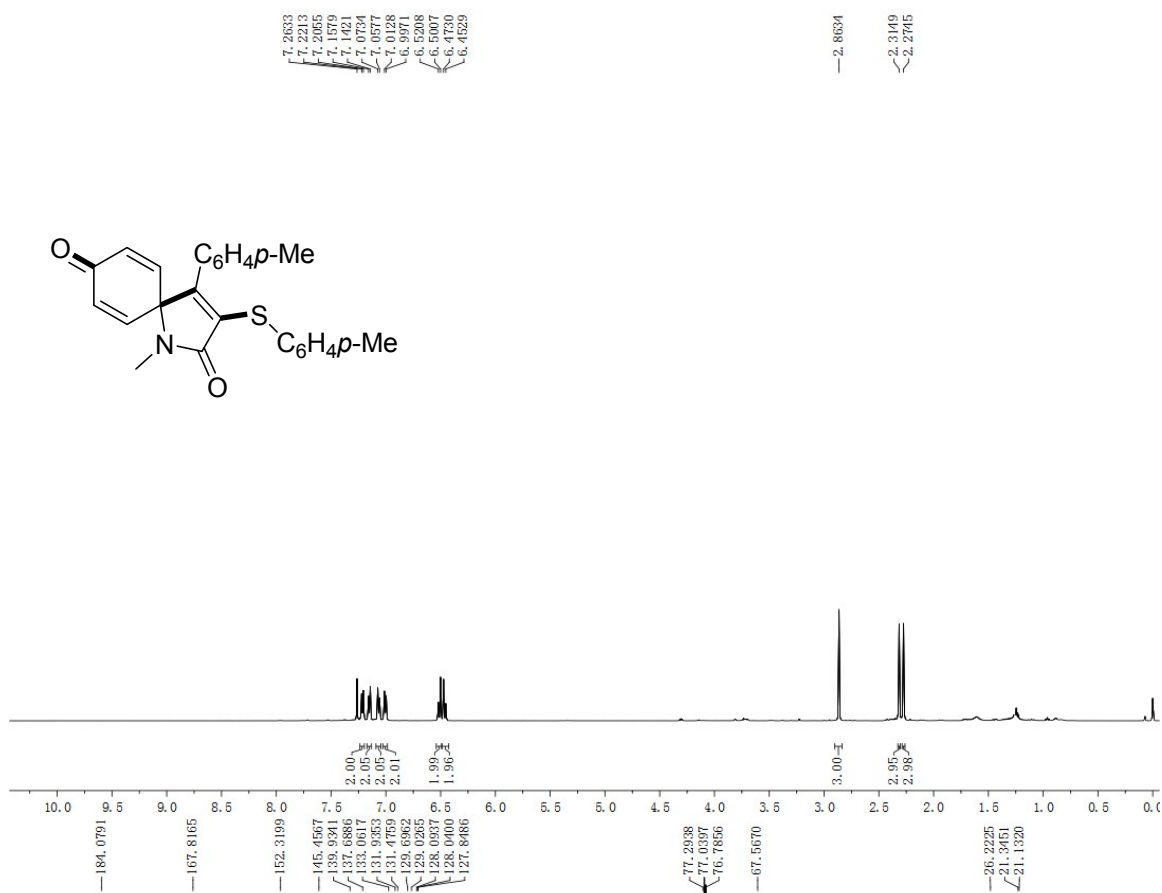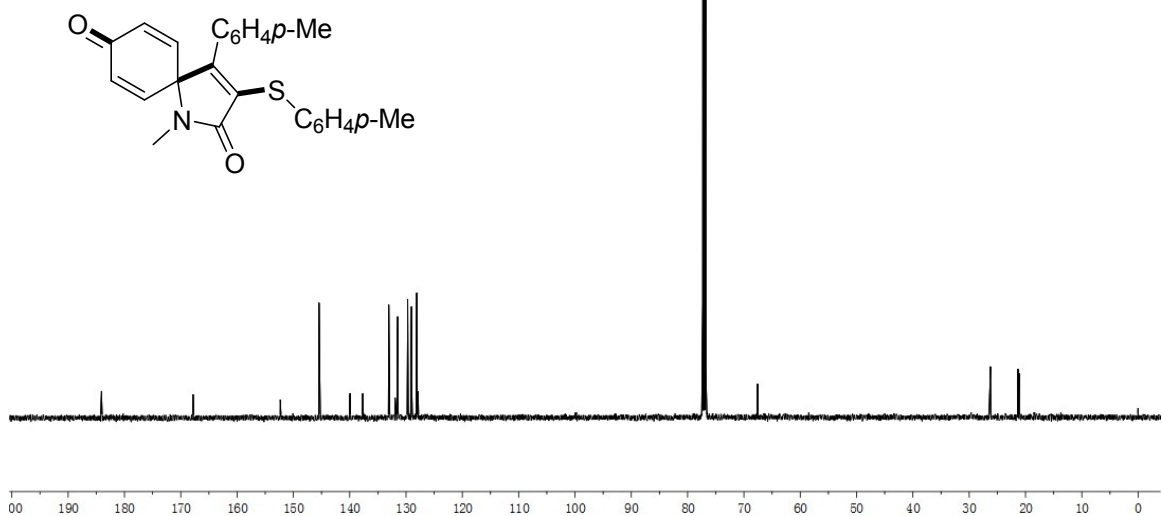

5c

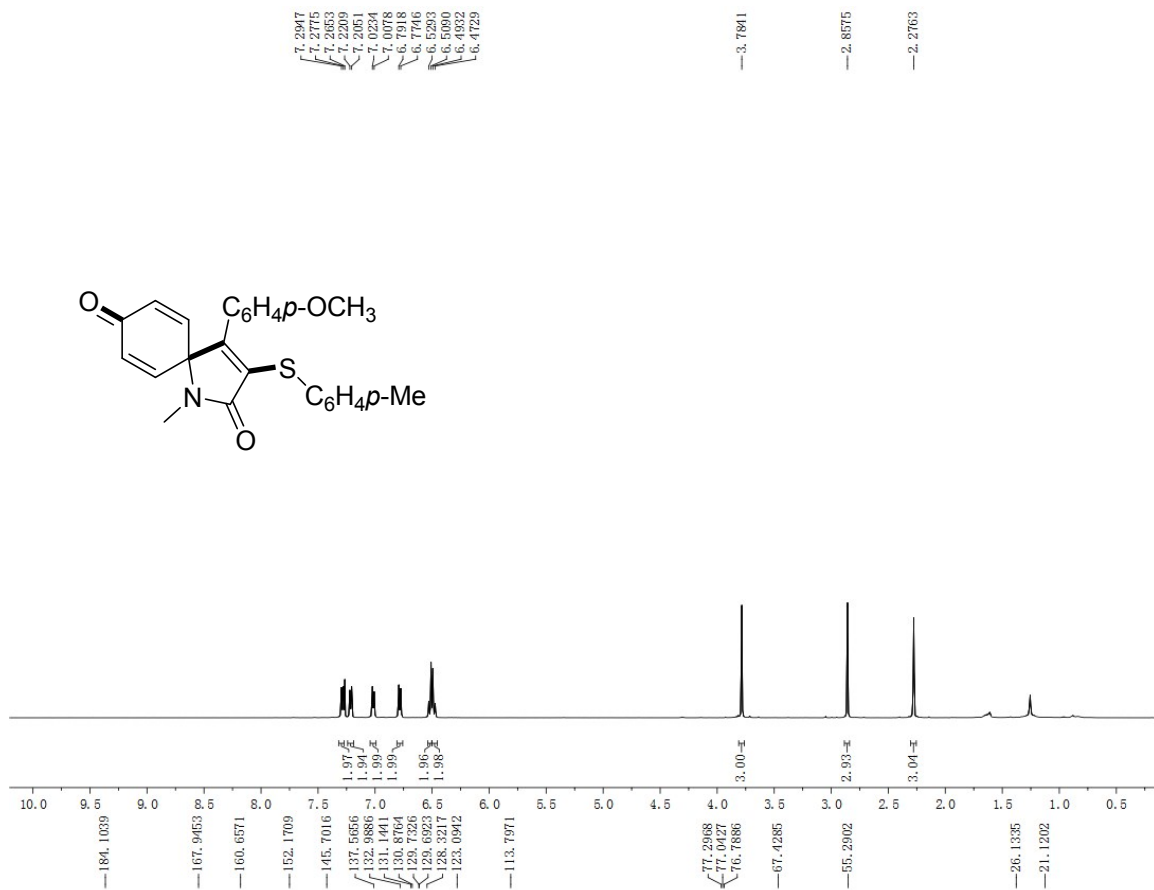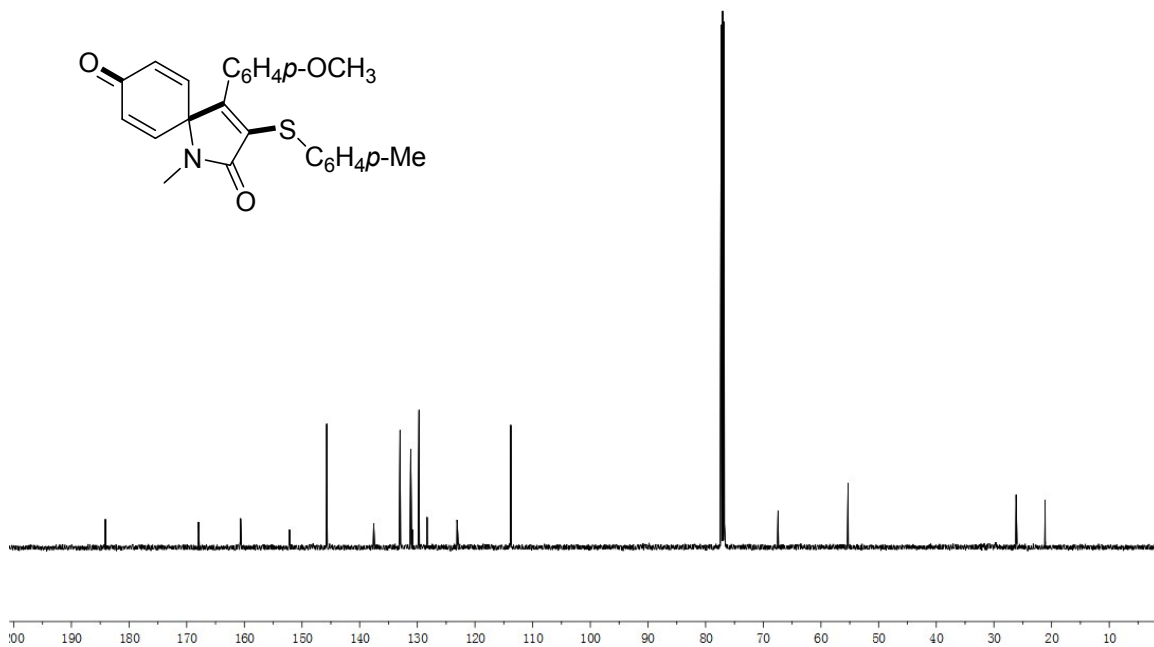

5d

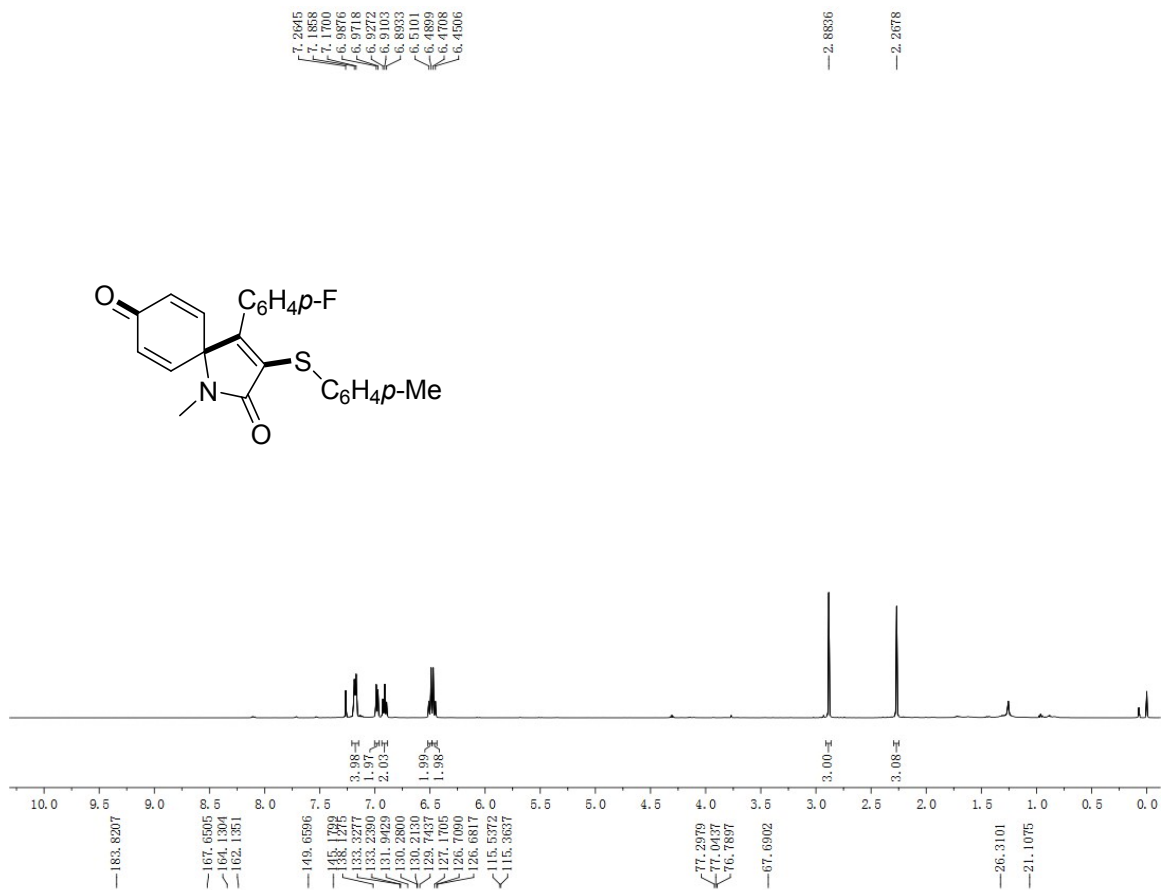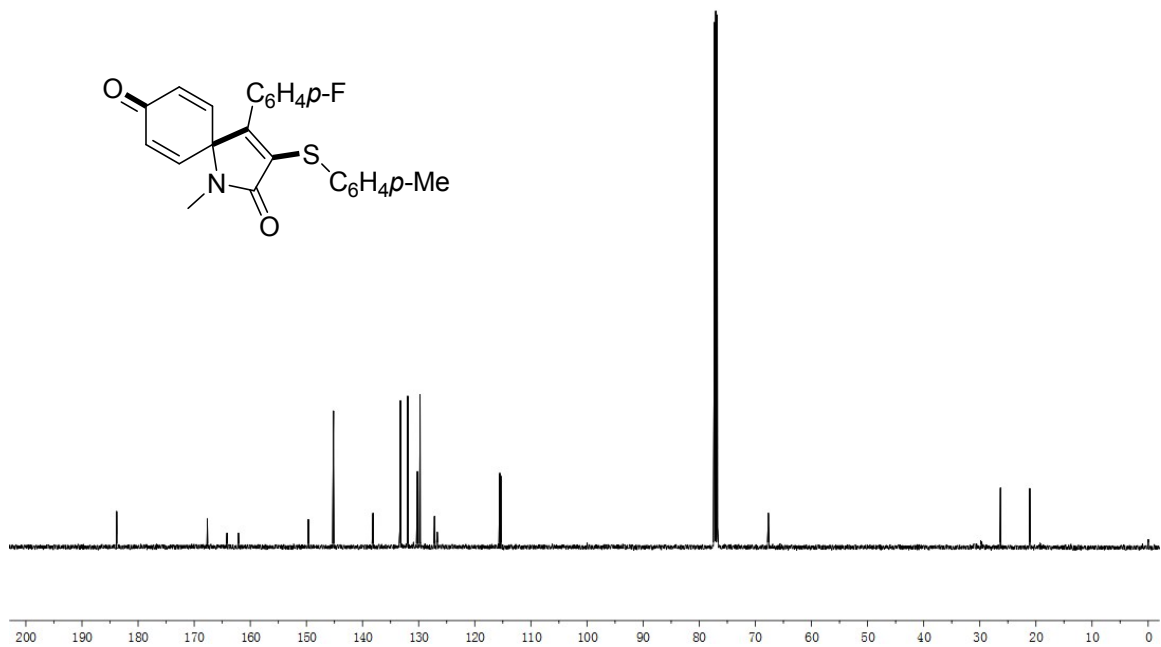

5e

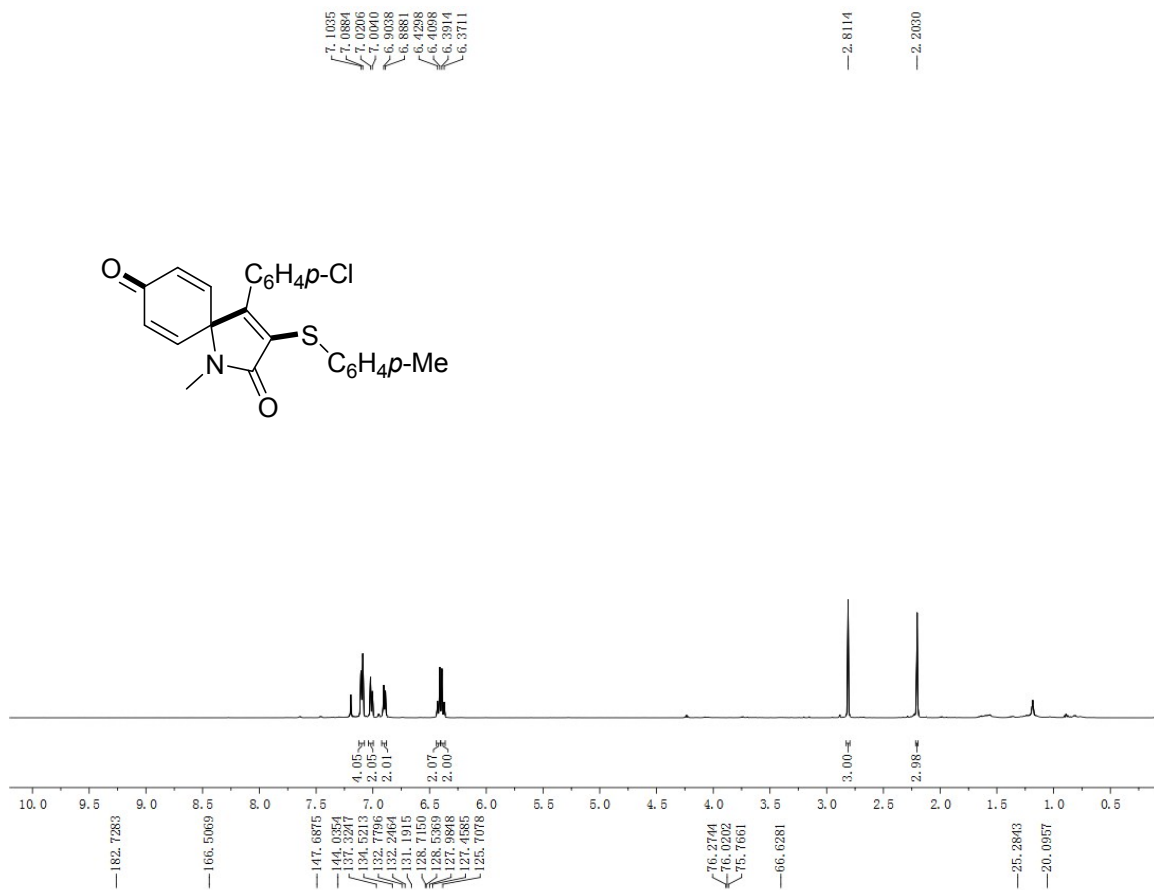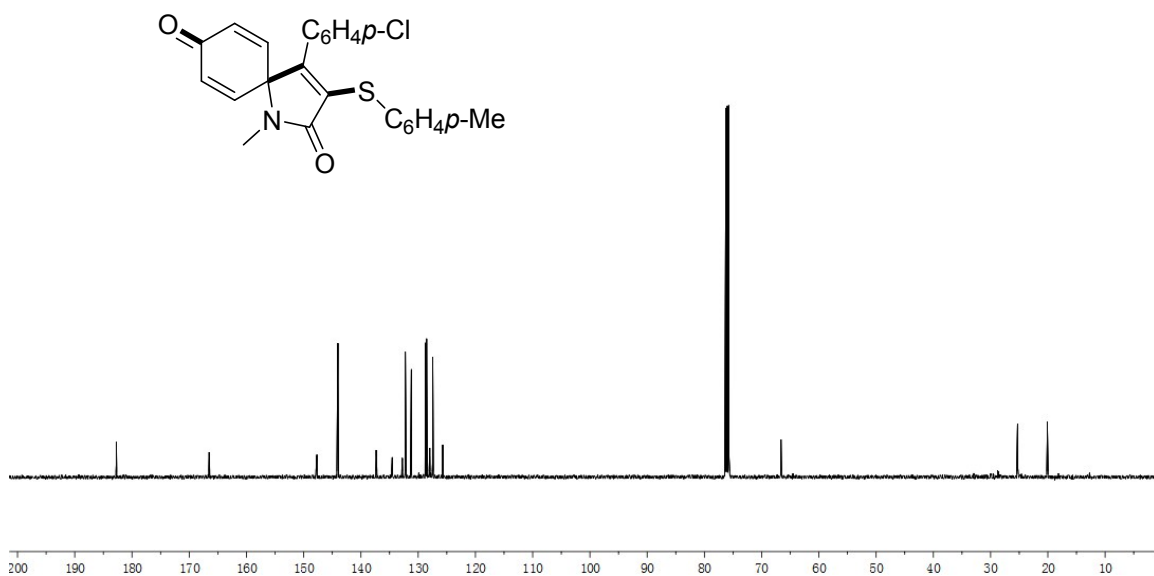

5f

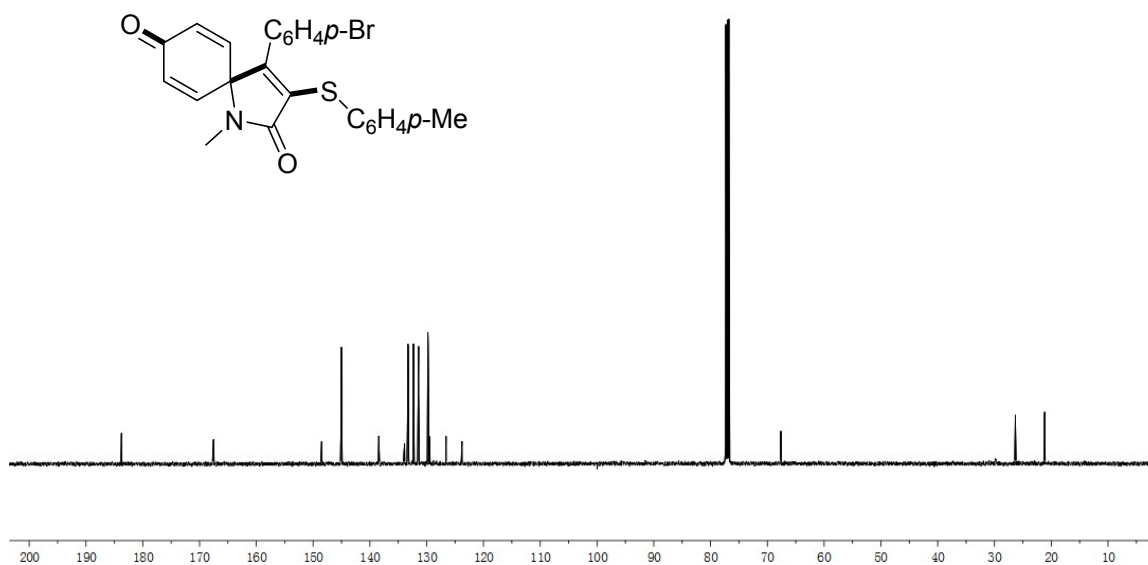

S56

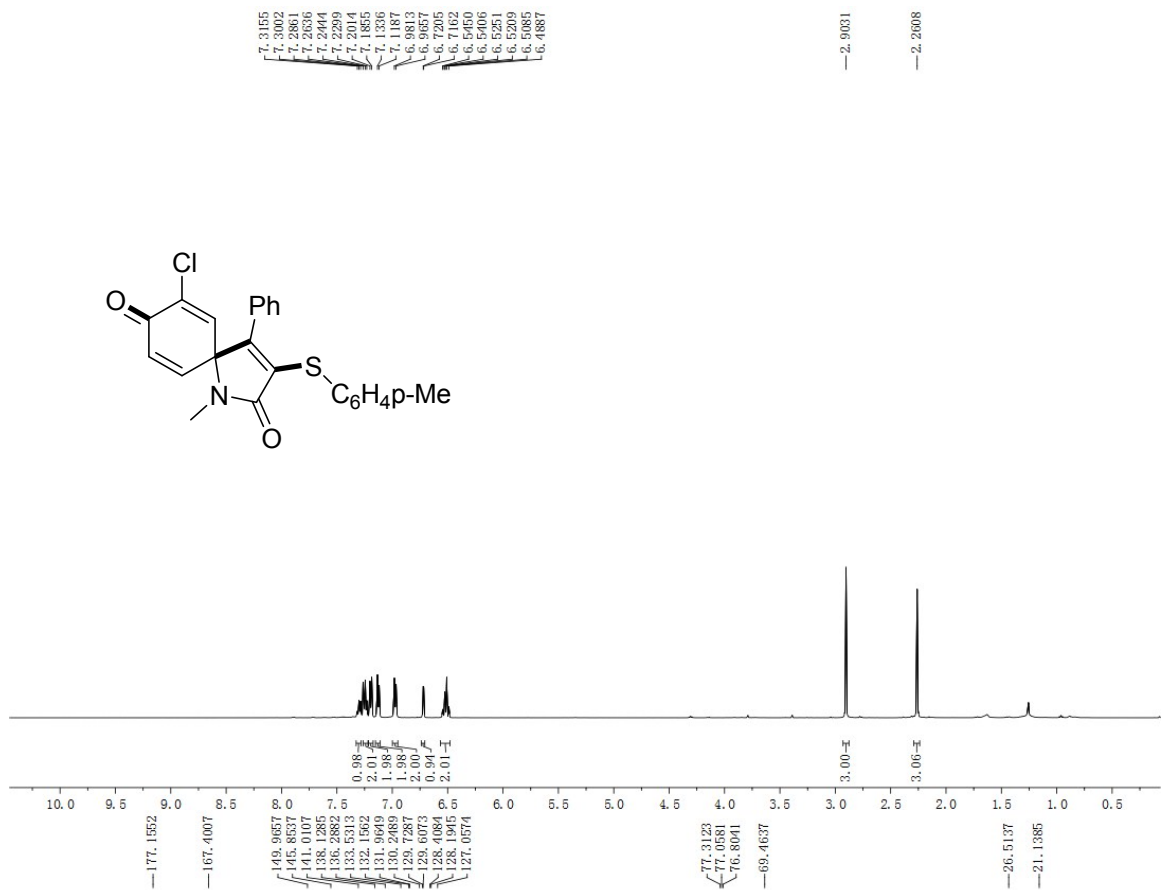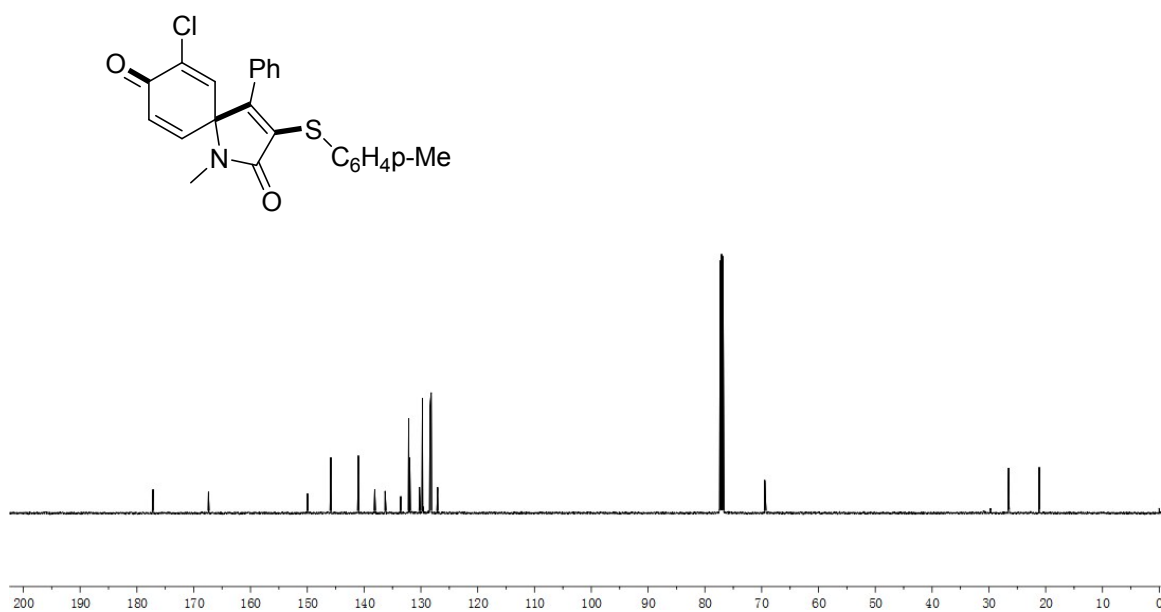

5h

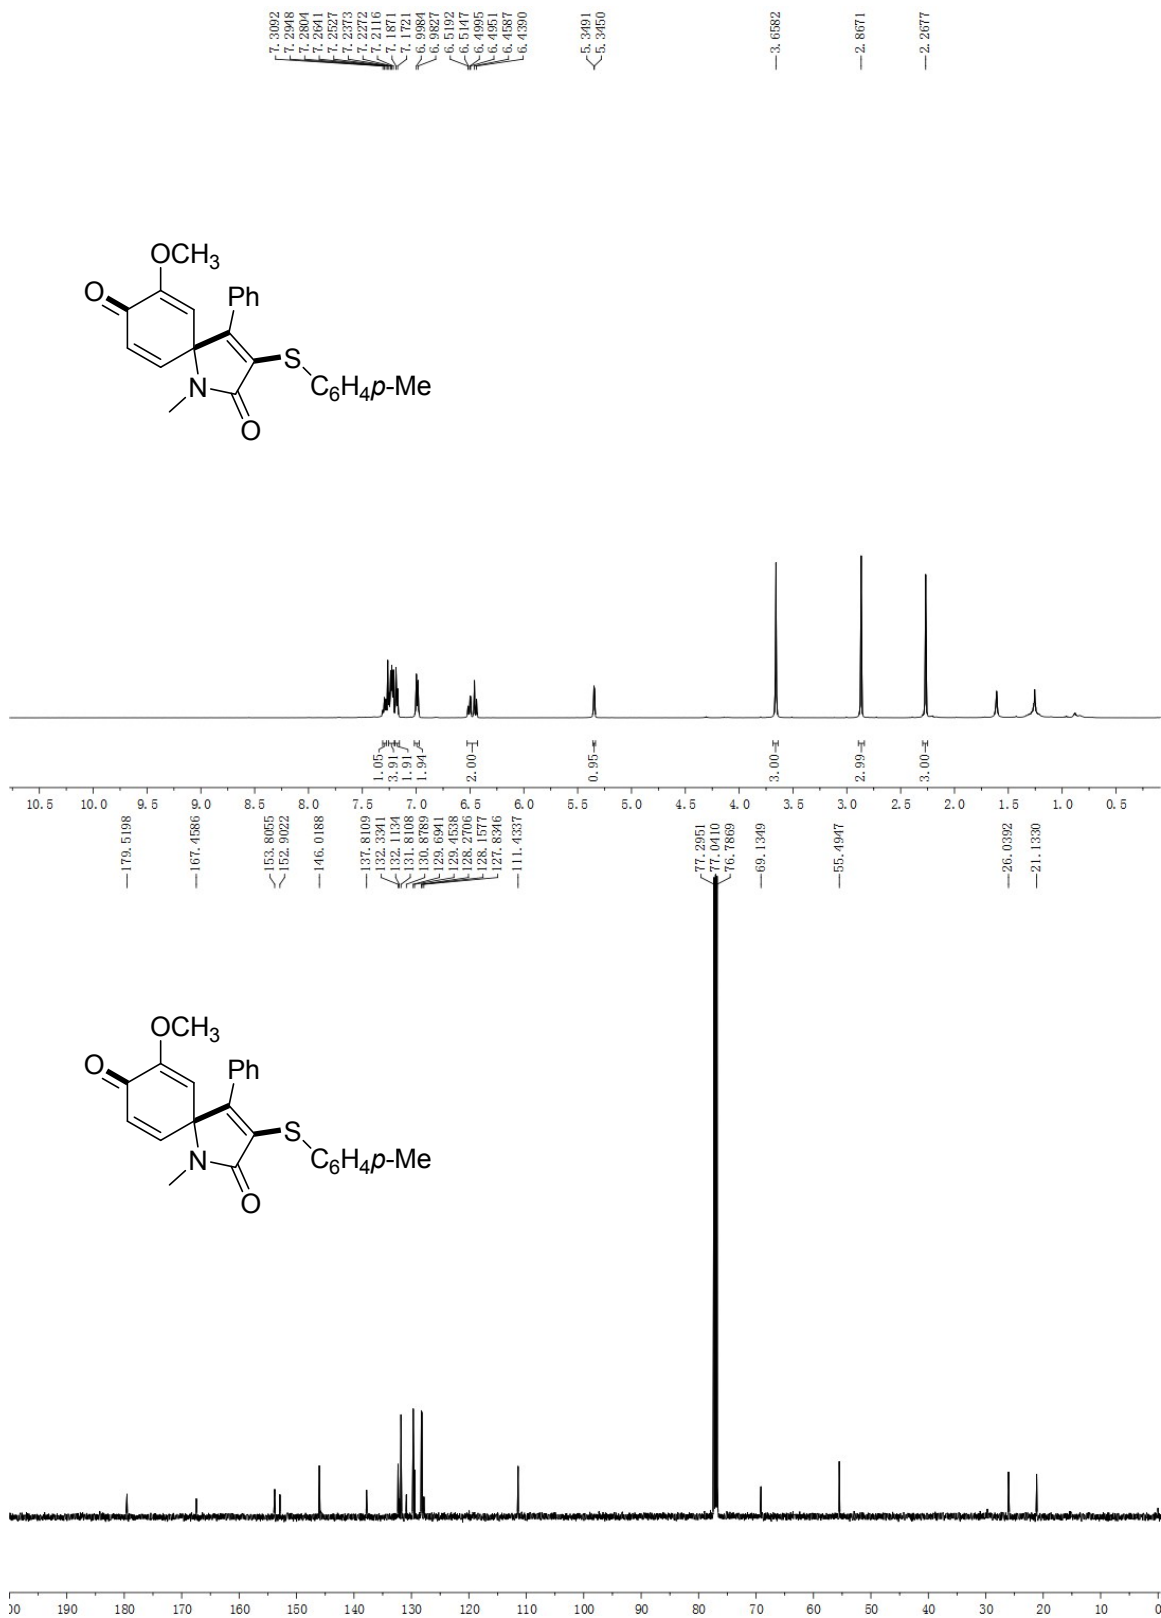

5i

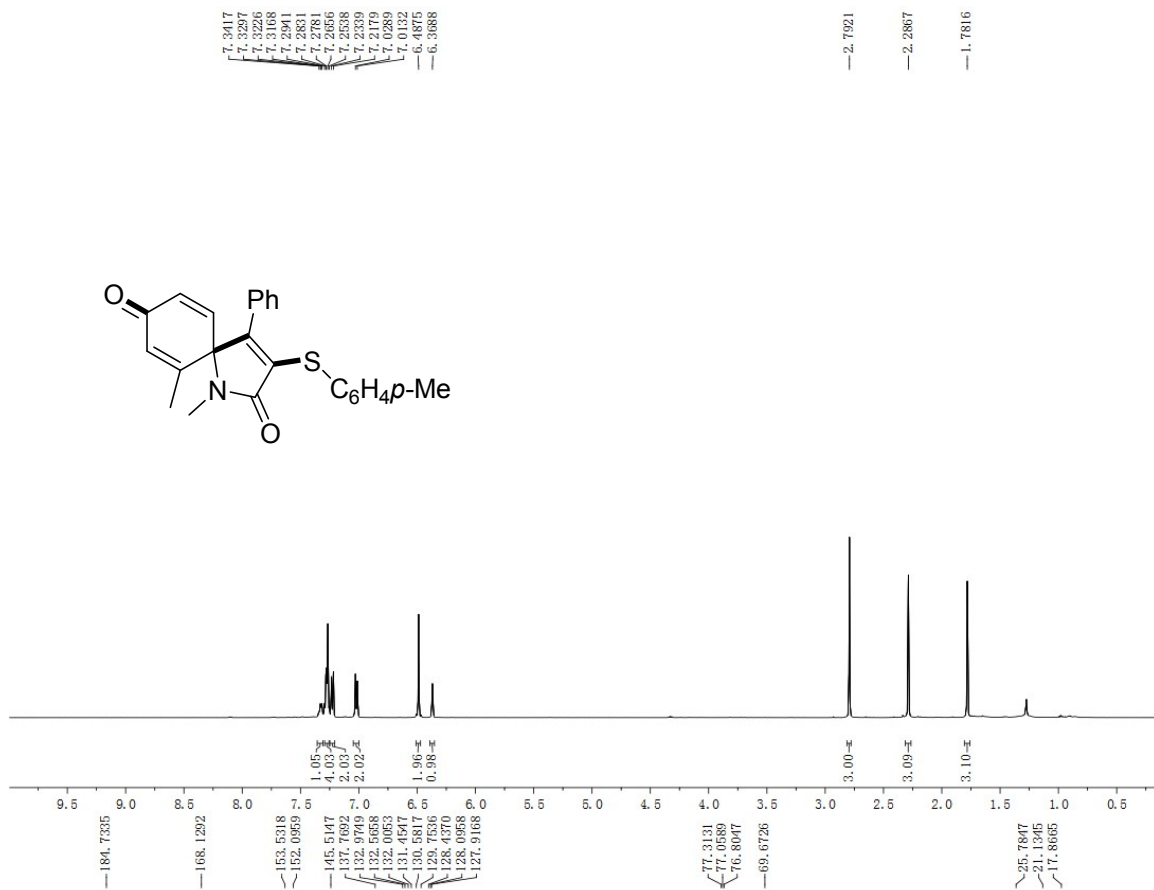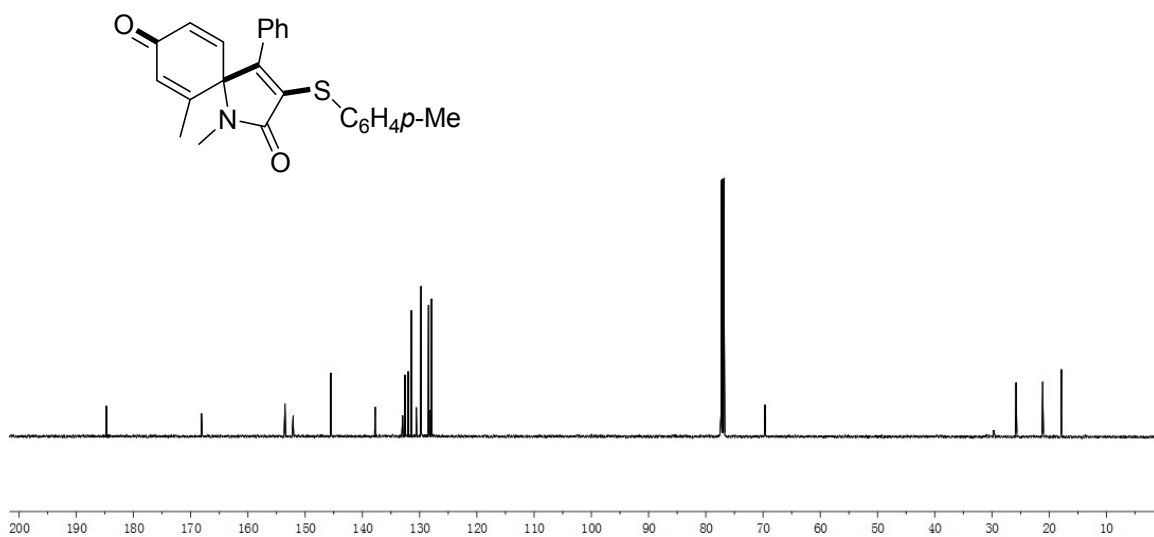

5j

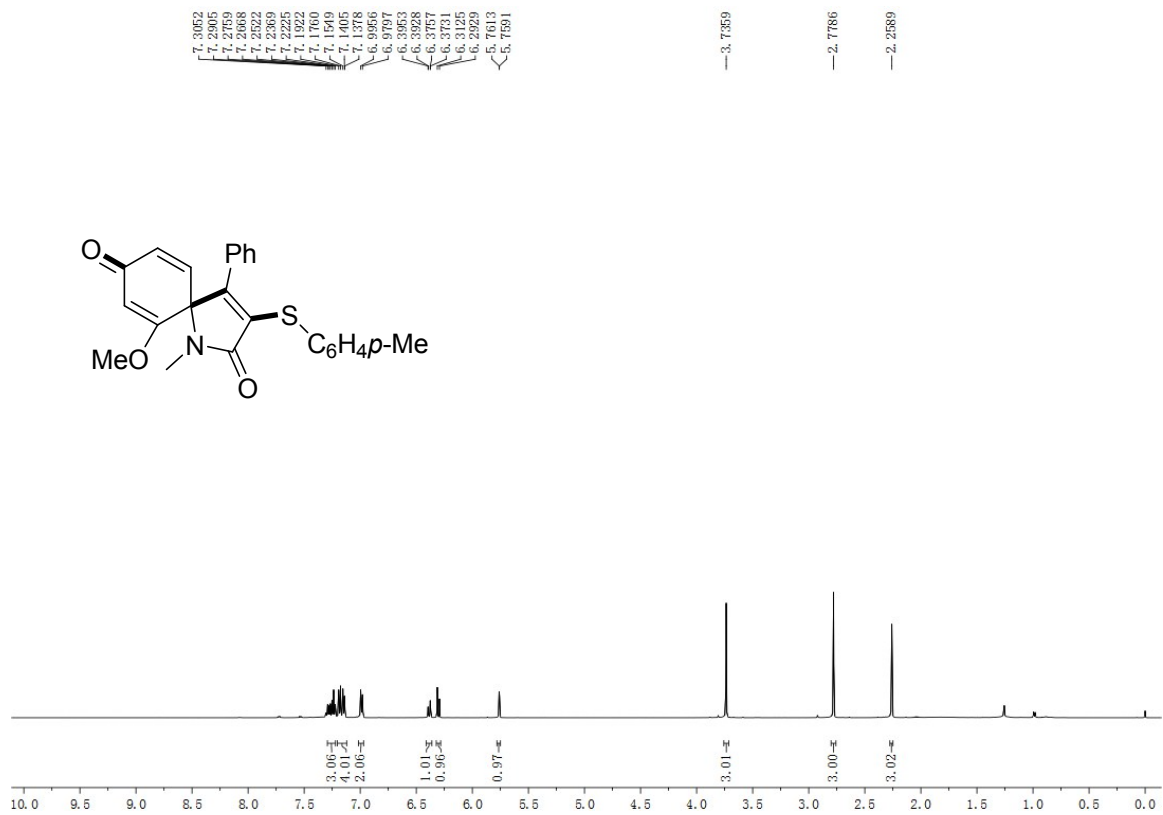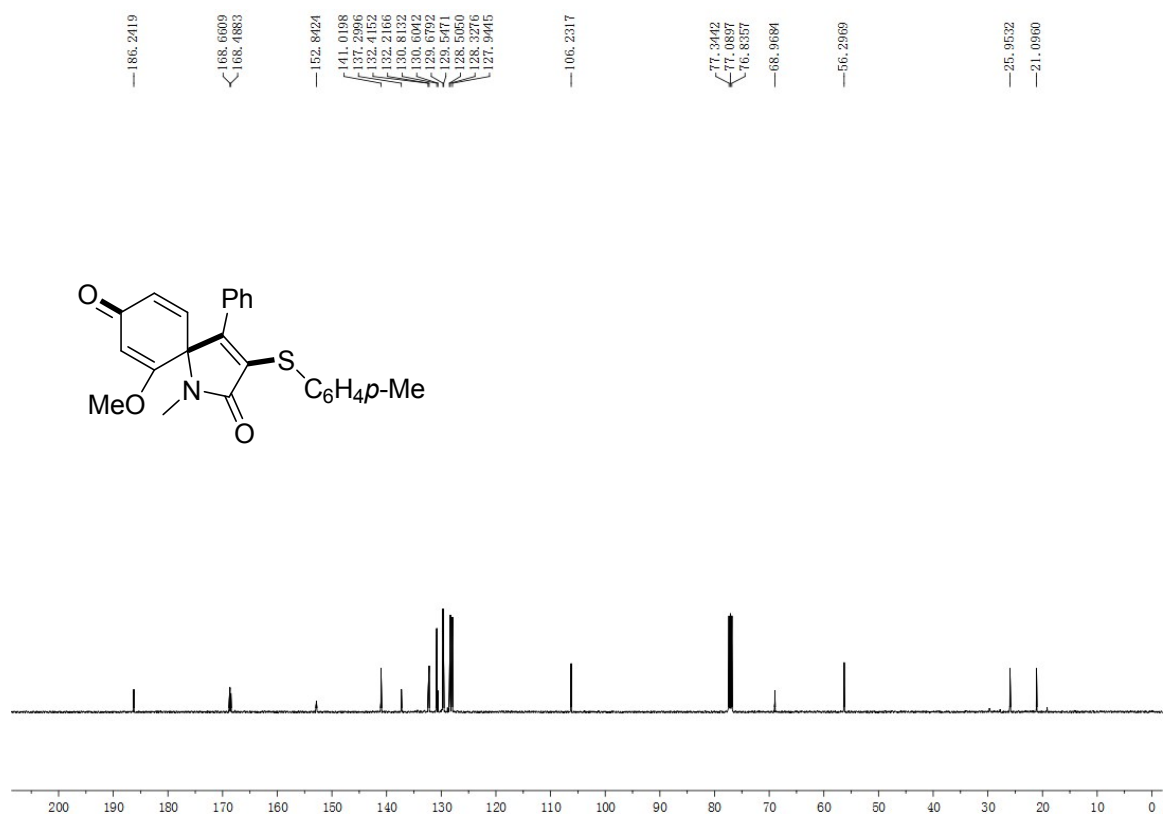

5k

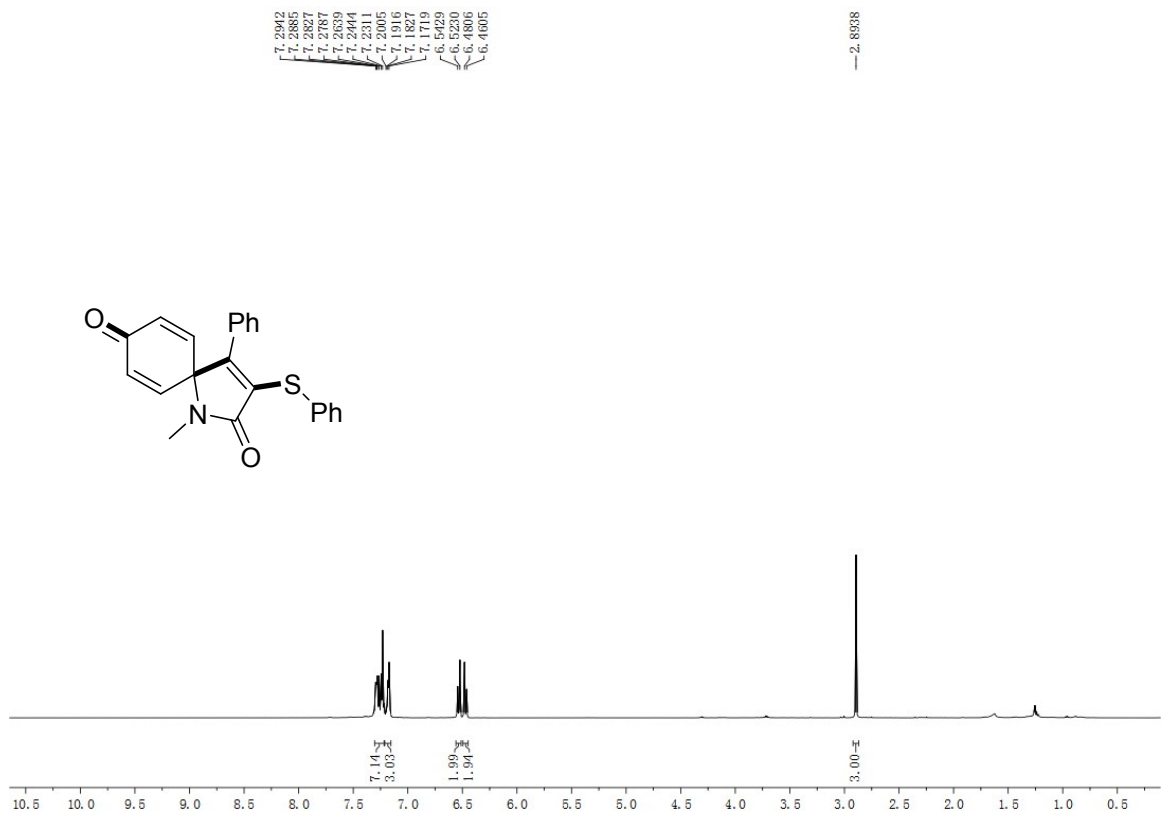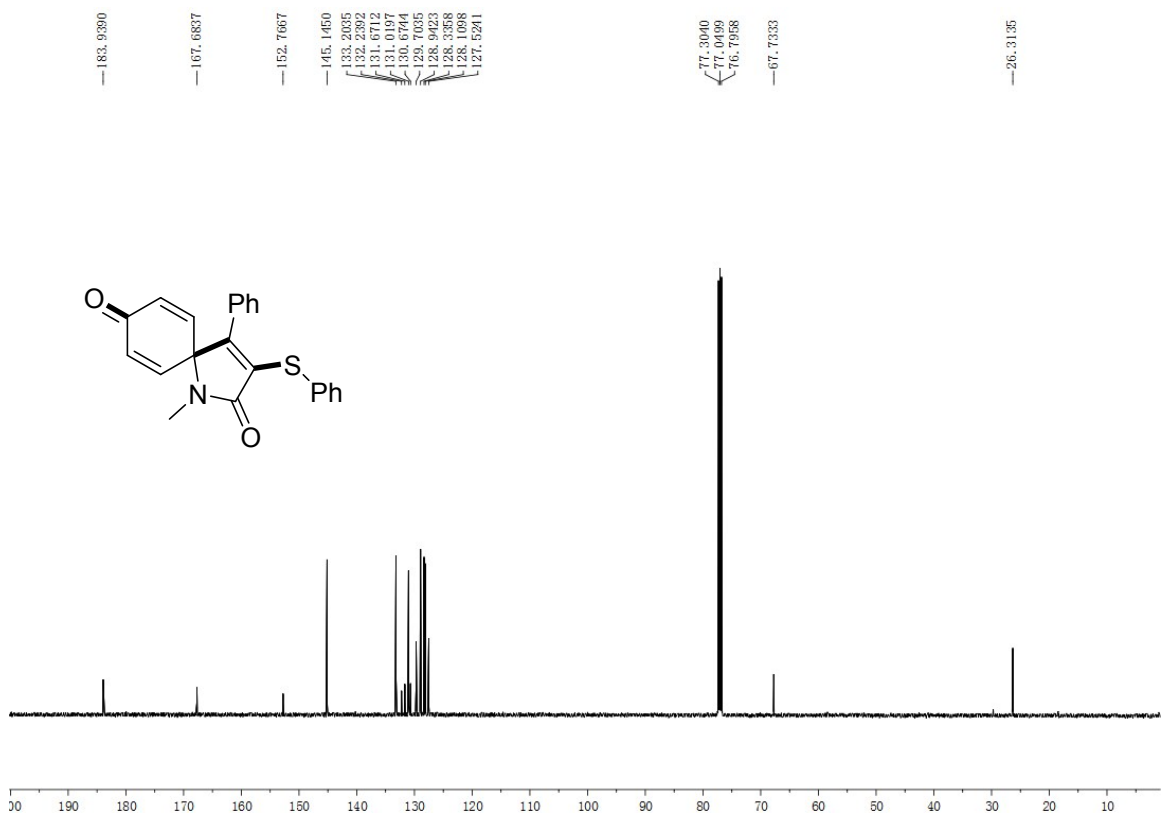

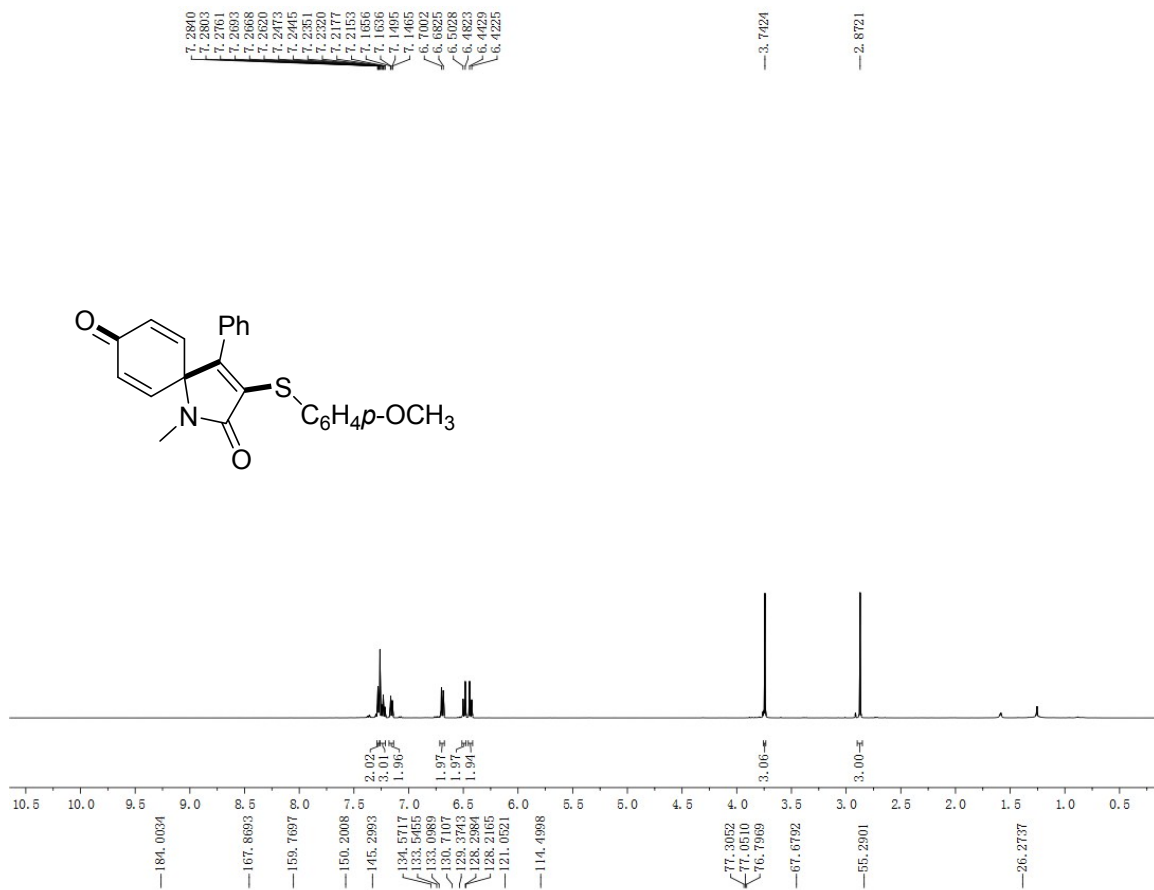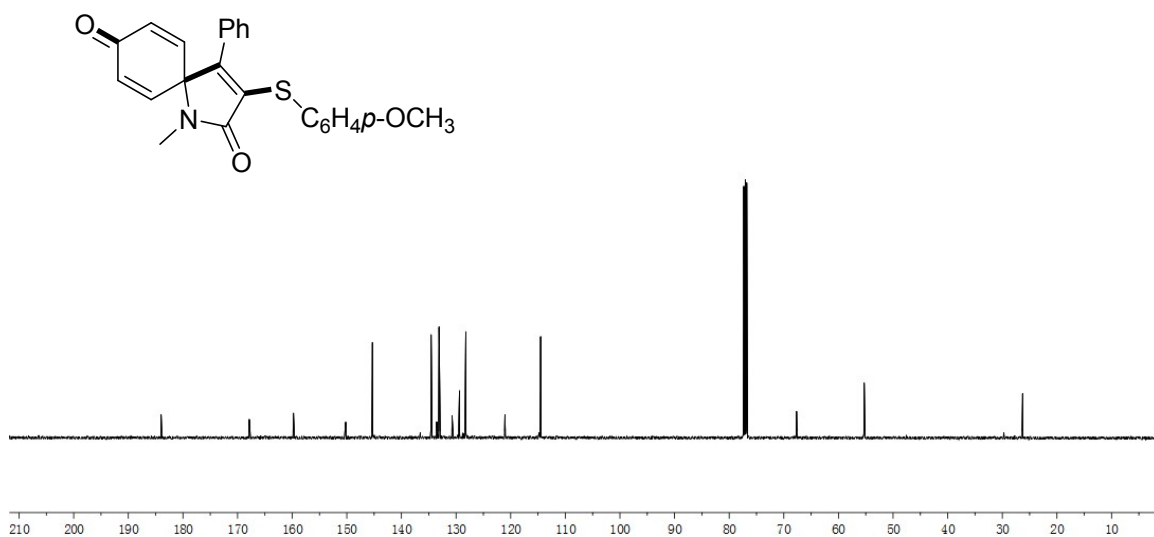

5m

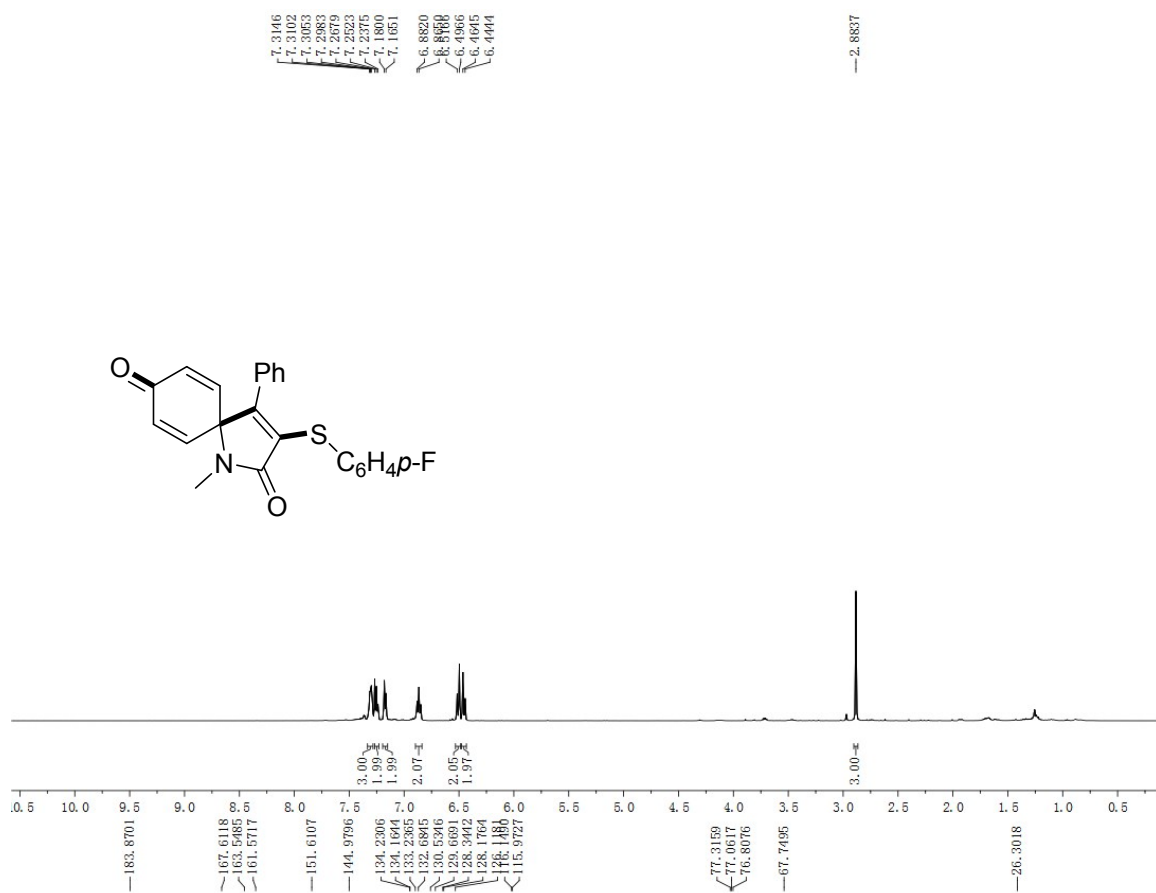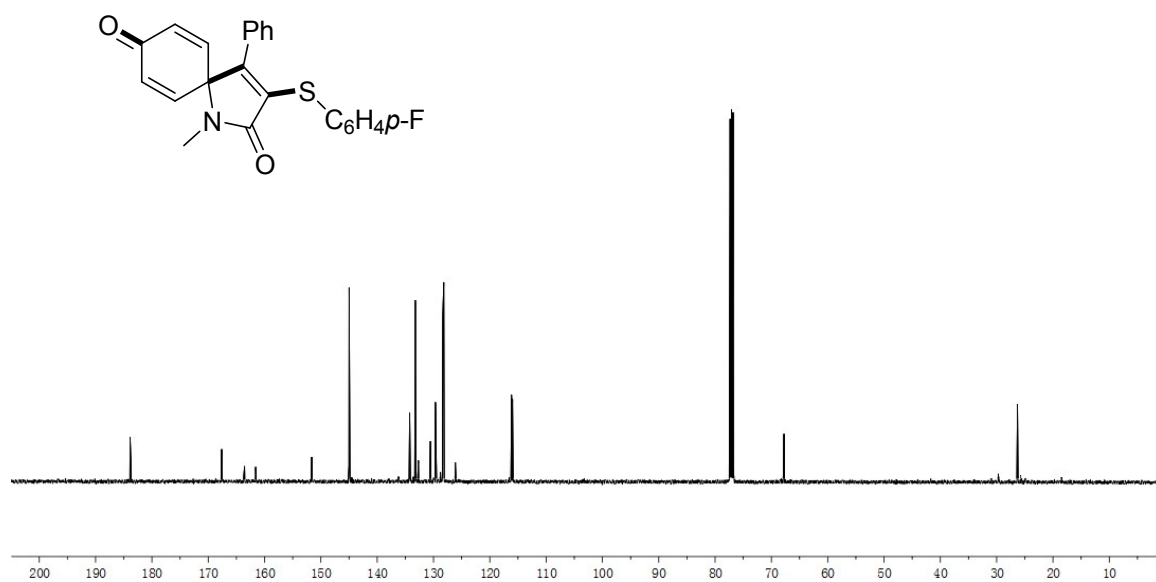

5n

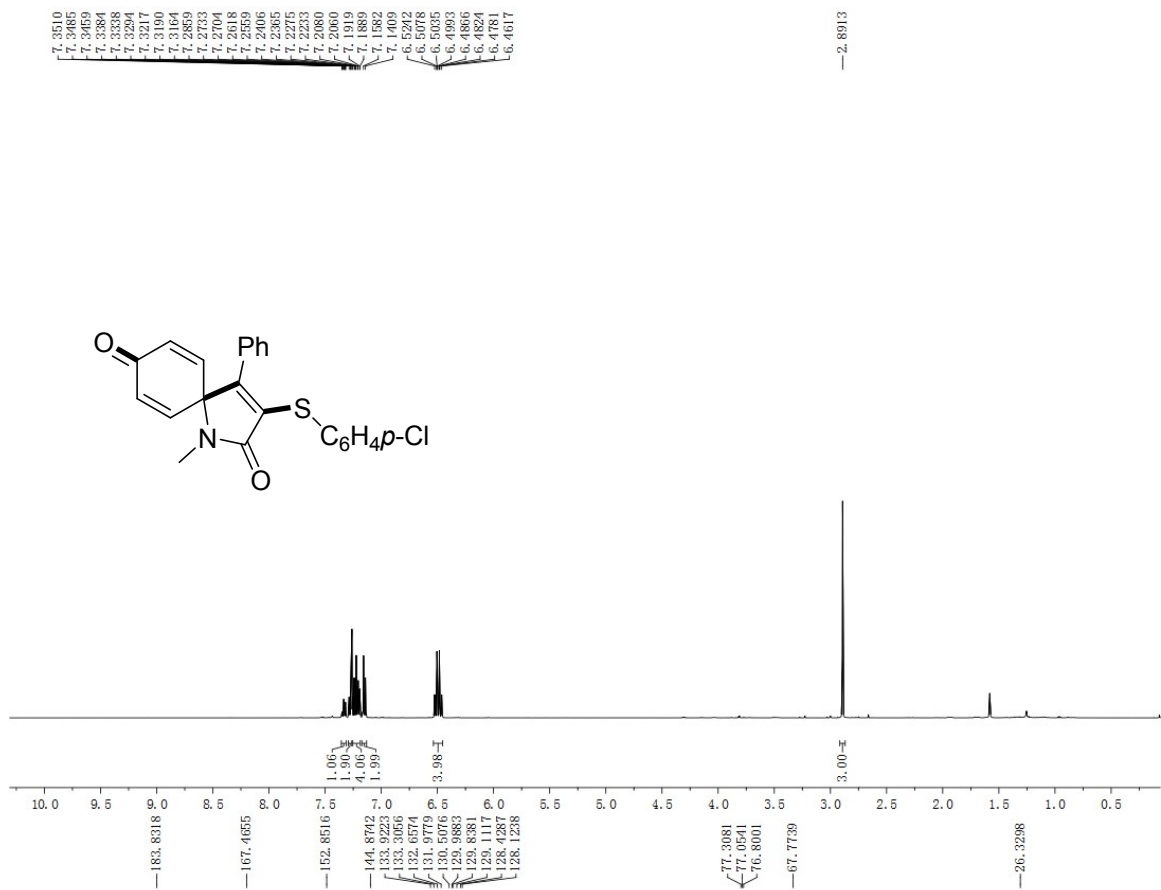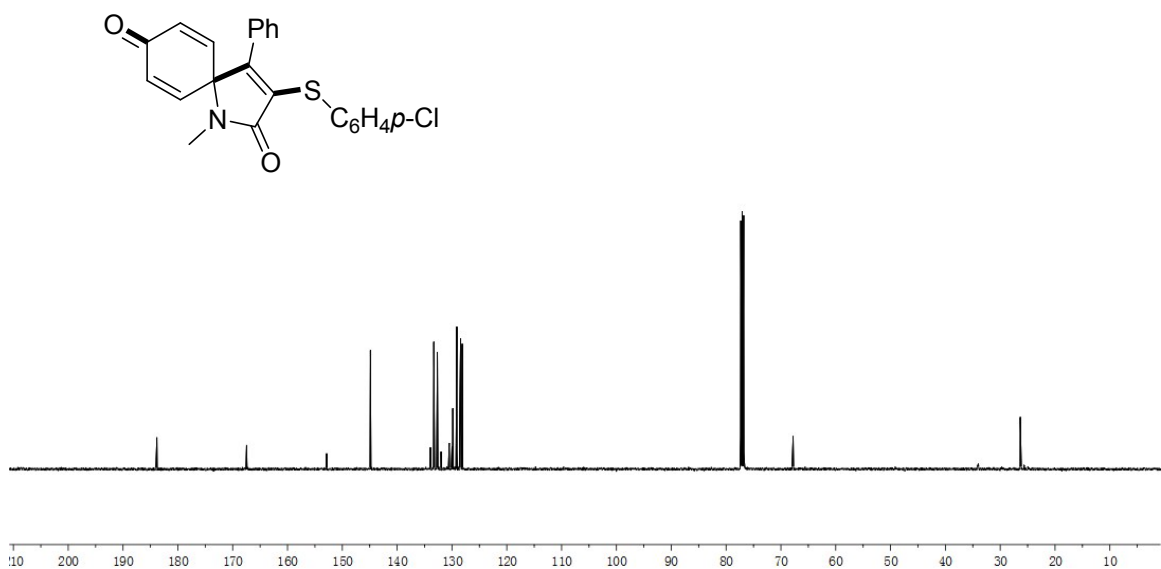

5o

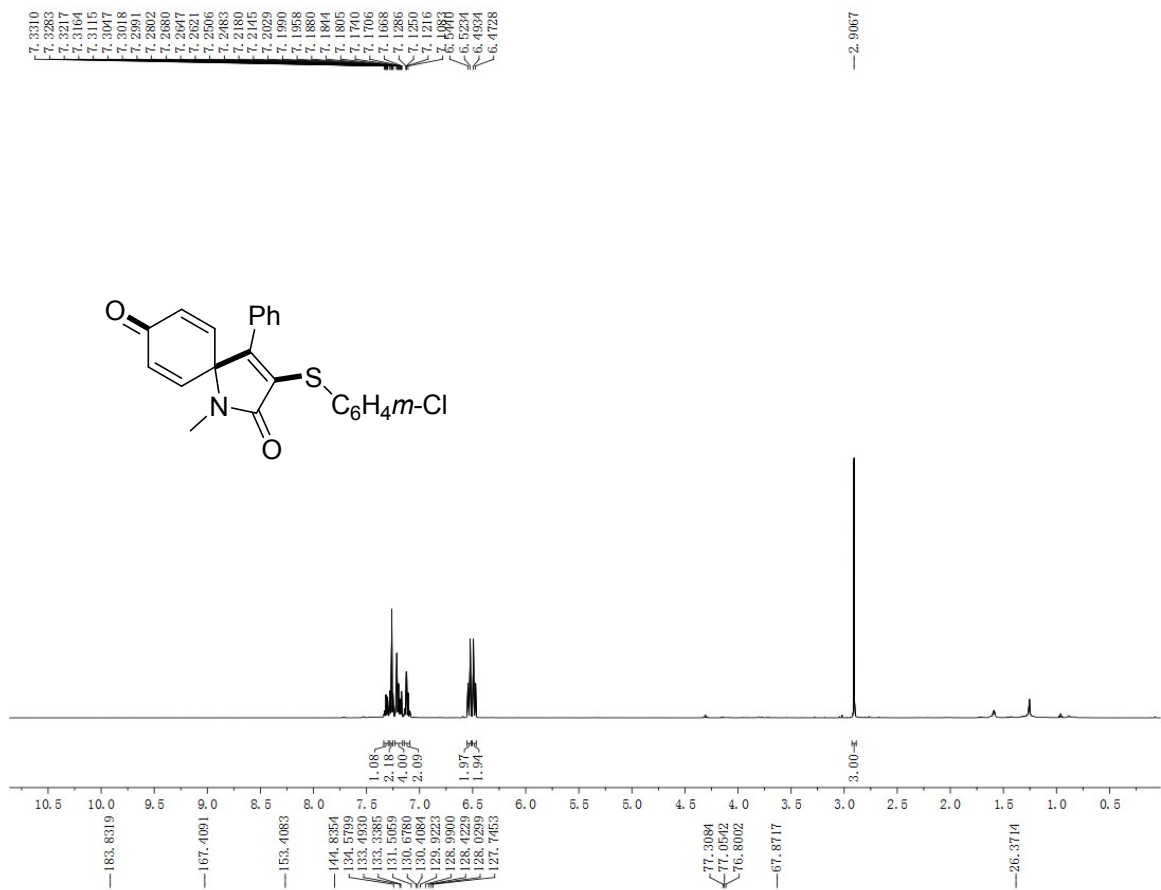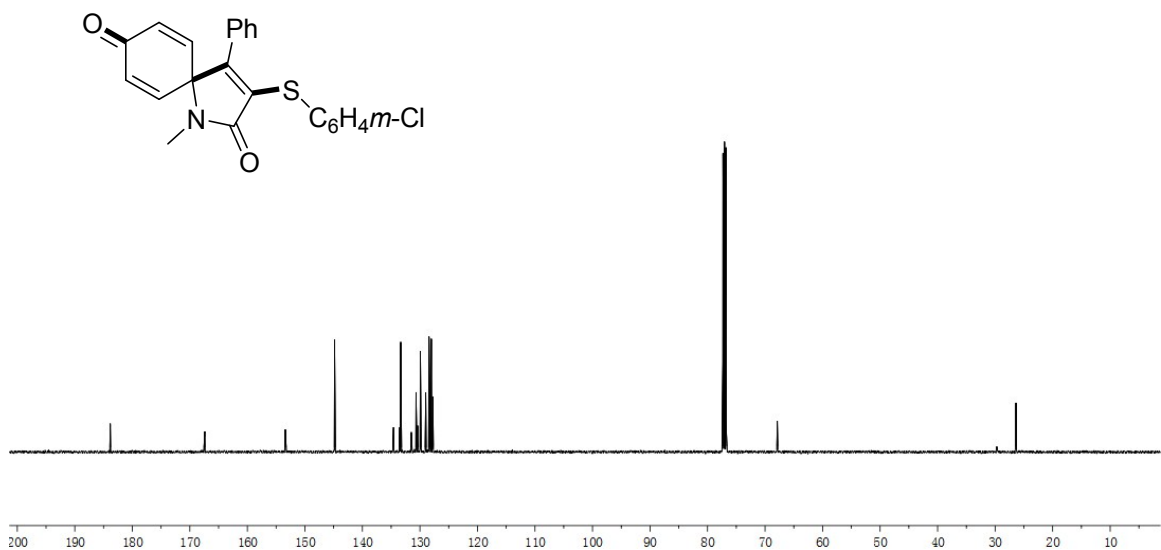

5p

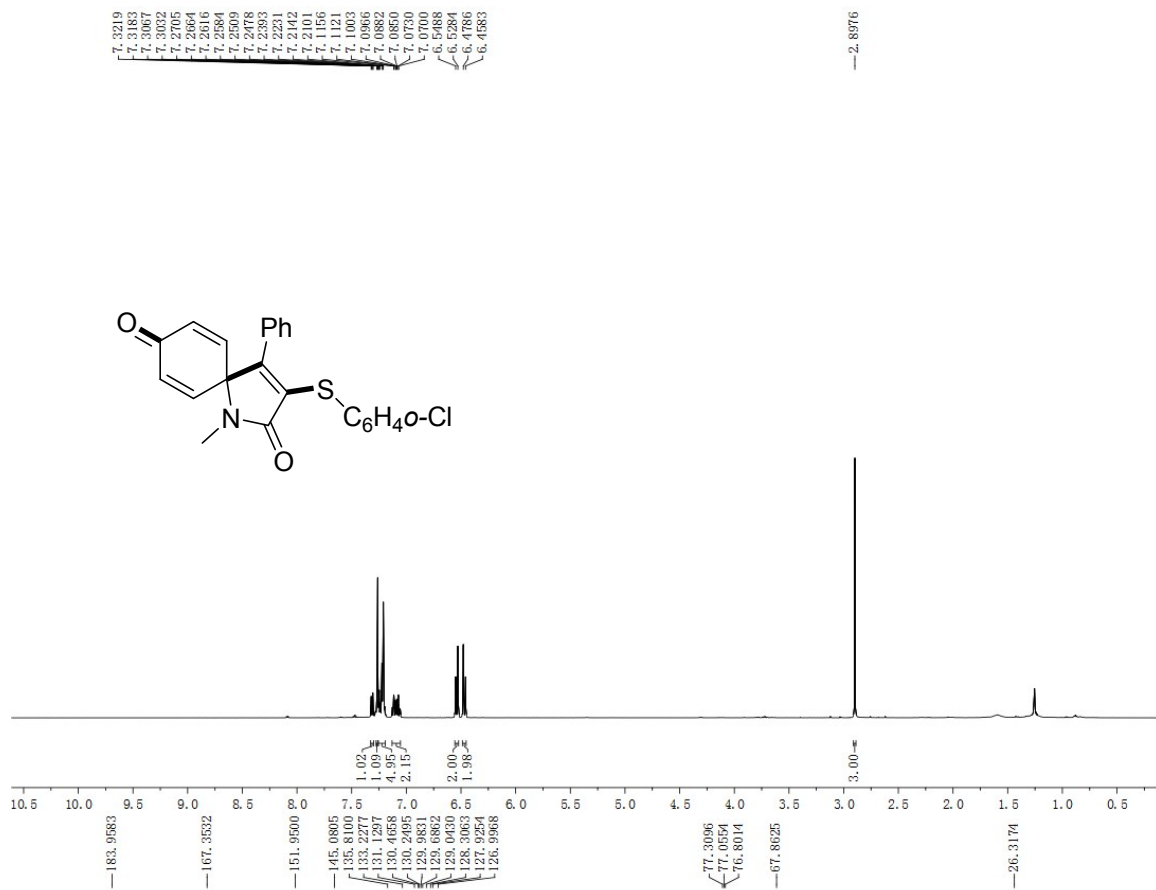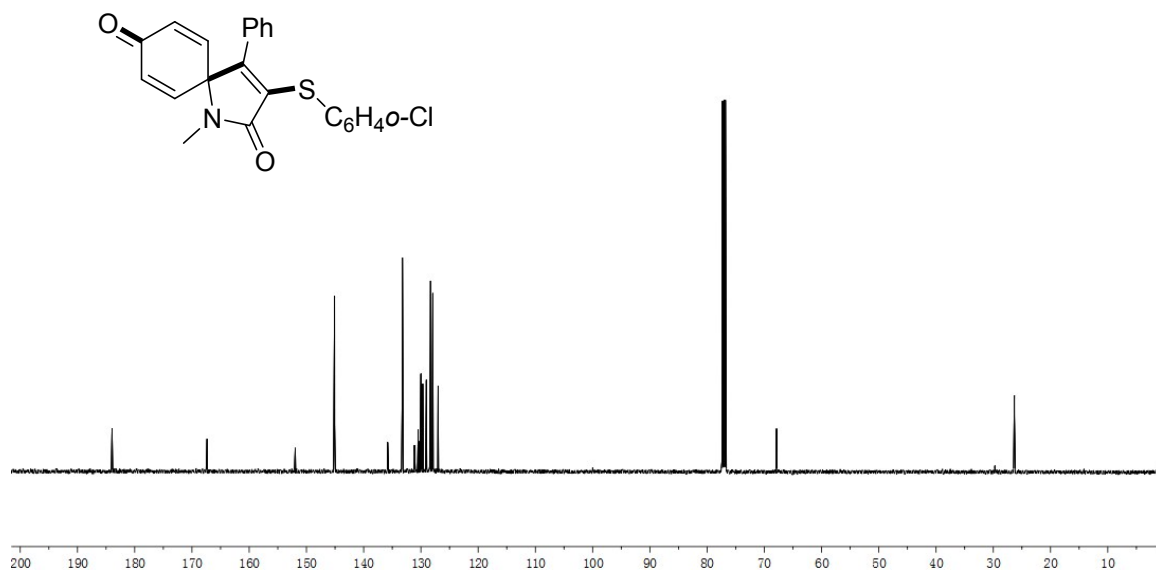

5q

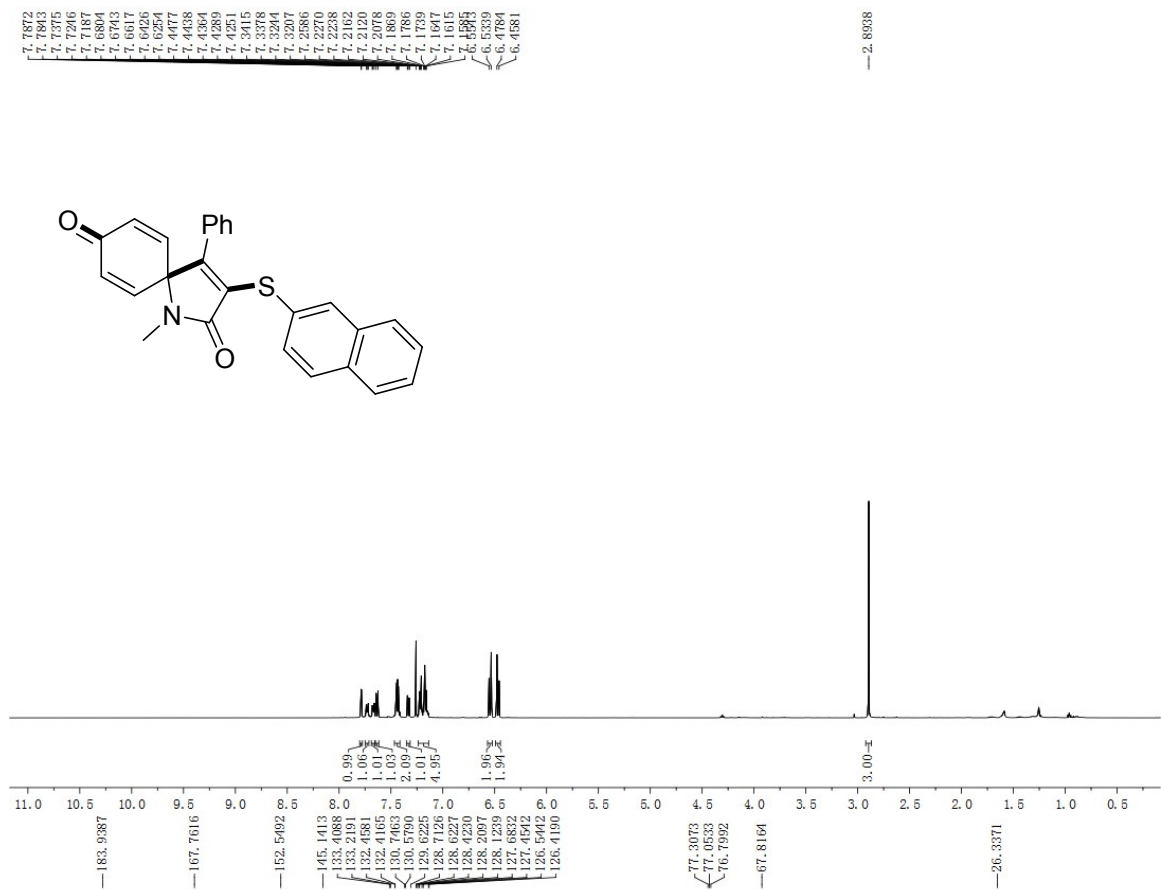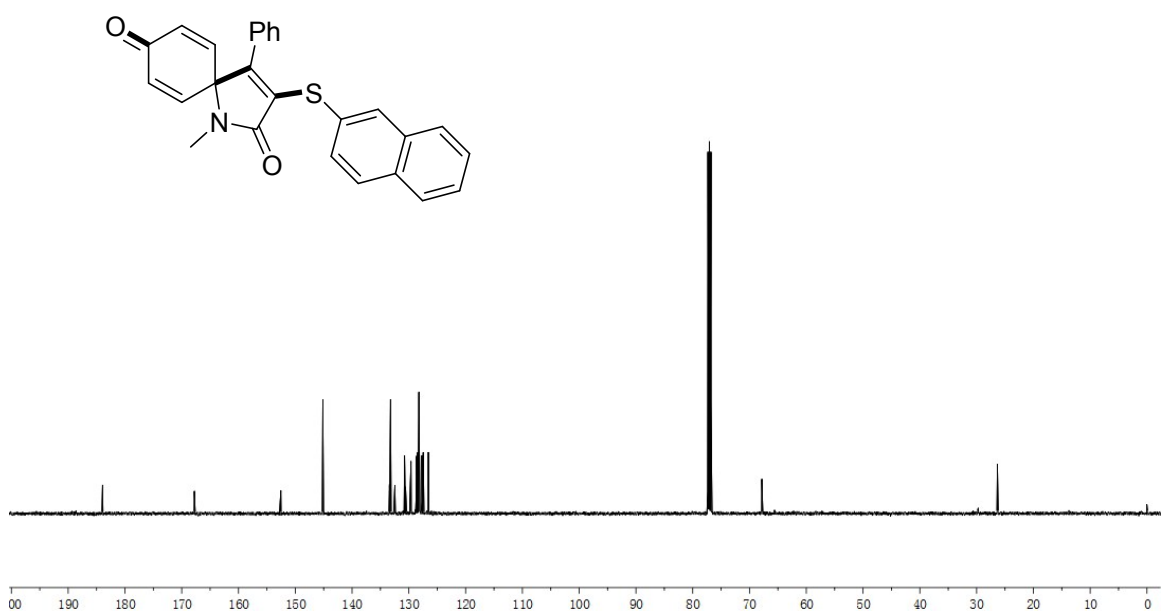

5r

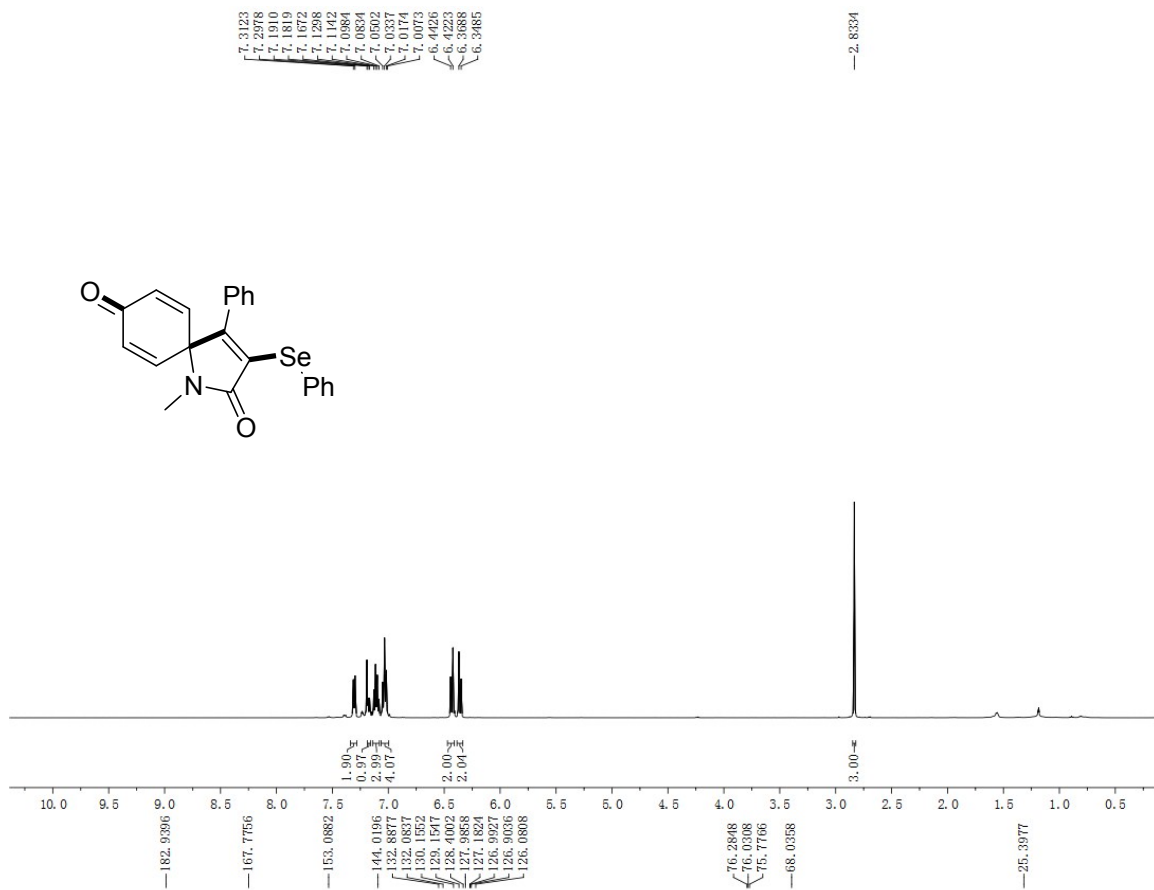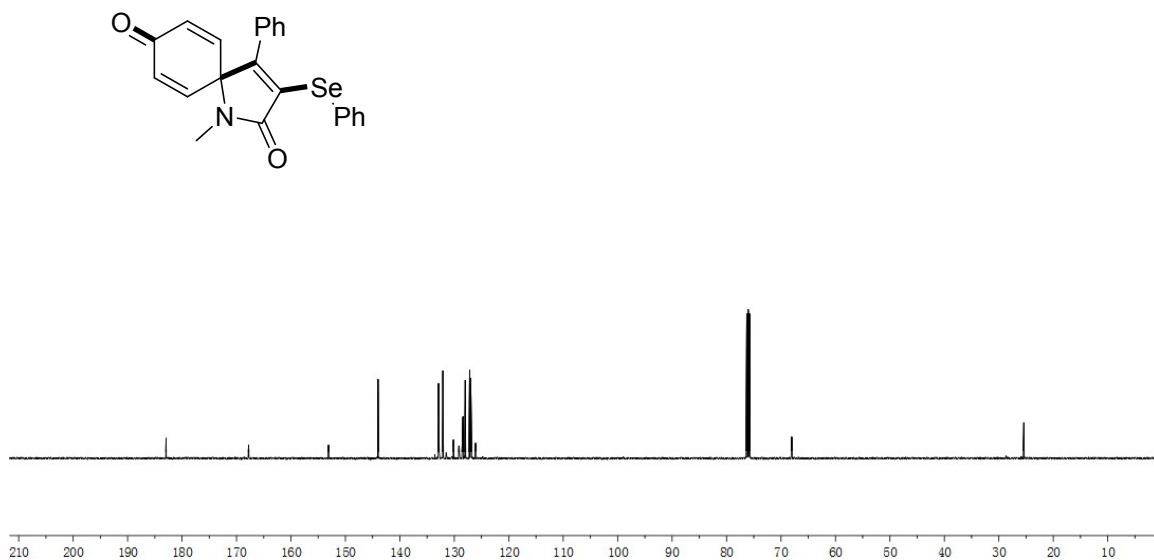

Supplement: c7gc02330h1.pdf [file c7gc02330h1.pdf]
